# Supplementary material for: Assessing the mechanism and therapeutic potential of modulators of the human Mediator complex-associated protein kinases
Source: eLife. 2016 Dec 9;5:e20722. doi: 10.7554/eLife.20722 (PMC5224920; doi:10.7554/eLife.20722)
Supplement: Figure 2—source data 1. — DOI: http://dx.doi.org/10.7554/eLife.20722.008 [file elife-20722-fig2-data1.xlsx]

## Sheet: Information
Details of human colorectal cancer cell line xenograft studies. nr = no response, ns = not significant. Significance was calculated using a 2-way ANOVA or Mann-Whitney 2-tailed test. In some experiments body weight loss required regime modification:
a = 70 x 2 for first week, 1 day treatment break, followed by 2/7 x 1 and 5/7 x 2
b = week 2 to end dose x 2 2/7d x 1 1d
c = treatment break d10 and 11
d = treatment break week 2 d 7-11
e = week 1 dose x 2 4/7 and x 1 3/7, week 2 to end dose x 2 5/7

## Sheet: Fig2_xenograft_summary
CMPD	Tumor model	Regime mg/kg x doses/day	Day assayed	No. mice	TGI %	P value
1	LS513	70 x 2 (3/7 d) and x 1 (2/7 d)b	17	10	81	<0.001
1	SW620	70 x 1c	14	10	31	<0.05
1	SW620	70 x 2 (5/7 d) and x 1 (2/7 d)d	14	10	36	<0.05
1	HCT116	17.5 x 2 (5/7 d)	15	10	31	ns
1	HCT116	35 x 2 (5/7 d)	15	10	41	<0.001
1	HCT116	70 x 2 (5/7 d)	15	10	60	<0.001
3	SW620	5 x 1	14	8	nr	ns
3	SW620	10 x 1	14	8	33	ns
3	SW620	30 x 1	14	8	48	<0.05
3	SW620	30 x 1b	14	9	44	<0.01
3	SW620	30 x 2 (5/7 d) and x 1 (2/7 d)e	14	12	44	<0.01
3	LS1034	30 x 1 (5/7 d)	21	15	55	<0.001
4	SW620	5 x 2	13	11	nr	ns
4	SW620	10 x 1	13	11	nr	ns
4	SW620	50 x 2b	16	8 to 10	51	ns
4	SW620	100 x 1	16	8 to 10	43	ns
4	LS1034	50 x 2	22	8 to 10	52	ns
4	LS1034	100 x 1	22	8 to 10	30	ns
