# Supplementary material for: Assessing the mechanism and therapeutic potential of modulators of the human Mediator complex-associated protein kinases
Source: eLife. 2016 Dec 9;5:e20722. doi: 10.7554/eLife.20722 (PMC5224920; doi:10.7554/eLife.20722)
Supplement: Figure 4—source data 1. — DOI: http://dx.doi.org/10.7554/eLife.20722.017 [file elife-20722-fig4-data1.xlsx]

## Sheet: Information
Input IDs	original probe/gene IDs in the activated dataset(s)
Network object name	Network object name network object name in MetaBase
Actual	number of network objects in the activated dataset(s) which interact with the chosen object
n	number of network objects in the activated dataset(s)
R	number of network objects in the complete database or background list which interact with the chosen object
N	total number of gene-based objects in the complete database or background list
Expected	mean value for hypergeometric distribution (n*R/N)
Ratio	connectivity ratio (Actual/Expected)
z-score	z-score ((Actual-Expected)/sqrt(variance))
p-value	probability to have the given value of Actual or higher (or lower for negative z-score)
SE	Superenhancer

## Sheet: SW620_Transcription factor
SW620														Colo205
Network Object Name	Actual	n	R	N	Expected	Ratio	p-value	z-score	Input IDs	Signal 2h	p-value	Signal 6h	p-value	Enrichment	Signal 2h	Signal 6h
GCR-alpha	146	1420	1150	26819	60.89	2.398	3.481e-23	11.46	A_33_P3216297	1.55412	0.0399362	0.529388	0.0399362	2.16	0	0
SP1	176	1420	1593	26819	84.35	2.087	4.322e-21	10.57						1.866	0	0
p63	69	1420	429	26819	22.71	3.038	1.346e-16	10.06						1.994	0	0
Androgen receptor	114	1420	973	26819	51.52	2.213	1.1e-15	9.112						1.863	0	0
STAT3	84	1420	623	26819	32.99	2.547	3.13e-15	9.235						2.059	0	0
c-Jun	94	1420	795	26819	42.09	2.233	2.333e-13	8.346						2.51	-1.1281	-1.02799
C/EBPalpha	55	1420	374	26819	19.8	2.777	6.72e-12	8.185						2.777	1.83728	1.92248
SMAD1	30	1420	131	26819	6.936	4.325	7.272e-12	9.021						3.109	0	0
C/EBPbeta	74	1420	609	26819	32.25	2.295	2.443e-11	7.643						2.408	0	0
c-Fos	50	1420	342	26819	18.11	2.761	7.512e-11	7.751						2.441	0.578828	1.06943
RelA (p65 NF-kB subunit)	92	1420	865	26819	45.8	2.009	1.481e-10	7.131						1.907	0	0
p53	117	1420	1209	26819	64.01	1.828	1.765e-10	6.964						1.802	0	0
ETS1	52	1420	383	26819	20.28	2.564	4.829e-10	7.29						1.967	0	0
ESR1 (nuclear)	118	1420	1249	26819	66.13	1.784	6.305e-10	6.712						1.647	0	0
SMAD4	37	1420	224	26819	11.86	3.12	7.142e-10	7.533						2.364	0	0
Oct-3/4	114	1420	1209	26819	64.01	1.781	1.4e-09	6.57						1.331	0	0
SMAD3	39	1420	253	26819	13.4	2.911	1.956e-09	7.223	A_23_P48936	-1.61786	1.78856e-08	-1.56408	1.78856e-08	2.495	0	0
HNF3-beta	42	1420	288	26819	15.25	2.754	2.633e-09	7.077						2.051	0	0
ATF-3	27	1420	139	26819	7.36	3.669	3.945e-09	7.458						3.077	0	0
SP3	60	1420	511	26819	27.06	2.218	6.978e-09	6.571						2.311	0	0
KLF4	43	1420	310	26819	16.41	2.62	7.954e-09	6.782						2.036	0	0
SRF	51	1420	405	26819	21.44	2.378	9.476e-09	6.609						2.413	0	0
HIF1A	70	1420	650	26819	34.42	2.034	1.471e-08	6.31						2.256	0	0
SMAD5	19	1420	78	26819	4.13	4.601	1.695e-08	7.53						3.394	0	0
EPAS1	30	1420	179	26819	9.478	3.165	2.02e-08	6.873						2.162	0	0
VDR	35	1420	232	26819	12.28	2.849	2.281e-08	6.689	A_23_P162589	-0.477792	0.000443804	-1.0289	0.000443804	2.809	1.23032	1.04986
TCF7L2 (TCF4)	47	1420	371	26819	19.64	2.393	2.97e-08	6.387	A_23_P127013	-0.287335	0.0212161	-1.28845	0.0212161	2.36	0	0
IRF8	36	1420	251	26819	13.29	2.709	5.448e-08	6.431						2.028	0	0
FKHR	37	1420	268	26819	14.19	2.607	9.744e-08	6.253						2.659	1.01202	0.945315
Fra-1	19	1420	88	26819	4.659	4.078	1.357e-07	6.838						2.545	0	0
EGR1	51	1420	442	26819	23.4	2.179	1.617e-07	5.911	A_23_P214080	-1.5235	9.53938e-06	-1.51467	9.53938e-06	1.935	0	0
PR (nuclear)	36	1420	263	26819	13.93	2.585	1.793e-07	6.109						2.865	0	0
WT1	27	1420	171	26819	9.054	2.982	3.531e-07	6.148						2.501	0	0
SMAD2	24	1420	143	26819	7.571	3.17	4.982e-07	6.151						2.848	0	0
STAT1	41	1420	340	26819	18	2.278	8.284e-07	5.605						2.575	0	0
AHR	34	1420	257	26819	13.61	2.499	8.676e-07	5.708						2.536	0	0
GATA-2	29	1420	201	26819	10.64	2.725	9.185e-07	5.804						2.431	0	0
NRSF	49	1420	444	26819	23.51	2.084	1.048e-06	5.448						1.697	0	0
NANOG	69	1420	714	26819	37.8	1.825	1.118e-06	5.284						1.512	0	0
Pitx2	15	1420	65	26819	3.442	4.358	1.135e-06	6.41						3.133	0	0
FOXO3A	28	1420	193	26819	10.22	2.74	1.257e-06	5.736						2.743	0	0
RARalpha	23	1420	141	26819	7.466	3.081	1.428e-06	5.857						2.888	0	0
ERG	18	1420	97	26819	5.136	3.505	2.986e-06	5.843						2.939	0	0
ETS2	21	1420	127	26819	6.724	3.123	3.232e-06	5.67						2.726	0	0
LHX2	42	1420	377	26819	19.96	2.104	4.77e-06	5.105	A_23_P32165	-1.48879	0.00755876	-0.325228	0.00755876	2.755	0	0
NF-AT2(NFATC1)	20	1420	121	26819	6.407	3.122	5.531e-06	5.531						3.198	0	0
ZNF143	24	1420	980	26819	51.89	0.4625	5.948e-06	-4.053						#N/A	#N/A	#N/A
RXRA	25	1420	177	26819	9.372	2.668	7.42e-06	5.263						2.646	0	0
PEA3	15	1420	75	26819	3.971	3.777	7.58e-06	5.695						#N/A	#N/A	#N/A
FOXQ1 (HFH1)	6	1420	11	26819	0.5824	10.3	8.001e-06	7.296						9.256	0	0
CTCF	23	1420	156	26819	8.26	2.785	8.277e-06	5.286						2.089	0	0
HNF4-alpha	51	1420	510	26819	27	1.889	1.088e-05	4.791						1.717	0	0
C/EBPdelta	23	1420	160	26819	8.472	2.715	1.266e-05	5.144						3.055	0	0
PAX6	20	1420	128	26819	6.777	2.951	1.318e-05	5.232	A_33_P3330149	-1.06205	0.00476586	-0.69282	0.00476586	#N/A	#N/A	#N/A
SOX9	22	1420	150	26819	7.942	2.77	1.404e-05	5.14						2.715	0	0
HOXC6	8	1420	23	26819	1.218	6.569	1.453e-05	6.318						5.312	0	0
Fra-2	15	1420	79	26819	4.183	3.586	1.469e-05	5.443						3.609	0	0
hASH1	13	1420	61	26819	3.23	4.025	1.477e-05	5.593						#N/A	#N/A	#N/A
AP-2A	31	1420	255	26819	13.5	2.296	1.48e-05	4.917						1.837	0	0
GLI-1	15	1420	80	26819	4.236	3.541	1.72e-05	5.382						2.8	0	0
CREB1	331	1420	5099	26819	270	1.226	1.986e-05	4.24						1.126	0	0
FLI1	18	1420	112	26819	5.93	3.035	2.376e-05	5.104						2.545	0	0
NF-kB1 (p50)	46	1420	457	26819	24.2	1.901	2.452e-05	4.594	A_23_P30024	-0.752107	1.43928e-07	-1.04143	1.43928e-07	1.782	0	0
PAX3	10	1420	39	26819	2.065	4.843	2.602e-05	5.678						3.655	0	0
HEY1	11	1420	47	26819	2.489	4.42	2.631e-05	5.549						3.033	-1.64079	-1.39737
GATA-4	23	1420	168	26819	8.895	2.586	2.818e-05	4.875						1.939	0	0
GATA-3	59	1420	642	26819	33.99	1.736	2.933e-05	4.461						1.998	0	0
PPAR-gamma	34	1420	305	26819	16.15	2.105	3.649e-05	4.591						2.07	0	0
JunD	25	1420	194	26819	10.27	2.434	3.65e-05	4.739						2.414	0	0
ELF3	9	1420	33	26819	1.747	5.151	3.869e-05	5.641						4.32	0	0
RFX6	10	1420	41	26819	2.171	4.606	4.165e-05	5.464						#N/A	#N/A	#N/A
OVOL2	5	1420	9	26819	0.4765	10.49	4.352e-05	6.735						#N/A	#N/A	#N/A
TCF7 (TCF1)	10	1420	42	26819	2.224	4.497	5.209e-05	5.362						#N/A	#N/A	#N/A
GATA-6	18	1420	119	26819	6.301	2.857	5.45e-05	4.8	A_23_P304450	-1.28849	6.91471e-05	-1.59609	6.91471e-05	2.567	0	0
PAX5	20	1420	141	26819	7.466	2.679	5.519e-05	4.726						2.744	0	0
FOXP2	25	1420	199	26819	10.54	2.373	5.585e-05	4.596						2.354	0	0
RARbeta	9	1420	35	26819	1.853	4.857	6.436e-05	5.398						4.073	0	0
AP-4	12	1420	61	26819	3.23	3.715	7.216e-05	5.02	A_23_P141092	-0.153864	0.0307245	-2.45891	0.0307245	3.338	0	0
GATA-5	8	1420	29	26819	1.535	5.21	9.567e-05	5.364						3.511	0	0
Lef-1	20	1420	147	26819	7.783	2.57	9.983e-05	4.512						2.771	0	0
PAX8	15	1420	93	26819	4.924	3.046	0.0001063	4.674						#N/A	#N/A	#N/A
Rad21	4	1420	6	26819	0.3177	12.59	0.0001077	6.714						10.18	0	0
BAPX1	12	1420	64	26819	3.389	3.541	0.0001175	4.813						3.818	0	0
MEF2C	13	1420	74	26819	3.918	3.318	0.0001242	4.721	A_23_P320739	3.00812	0.0163917	-0.0100355	0.0163917	#N/A	#N/A	#N/A
p73	20	1420	151	26819	7.995	2.502	0.0001451	4.375						2.023	0	0
EGR2 (Krox20)	16	1420	107	26819	5.665	2.824	0.0001592	4.47	A_23_P46936	2.45296	0.000148242	1.34927	0.000148242	2.664	-1.17439	-1.64887
KLF15	8	1420	31	26819	1.641	4.874	0.00016	5.103						#N/A	#N/A	#N/A
TRPS1	6	1420	17	26819	0.9001	6.666	0.0001627	5.525	A_33_P3361746	1.62985	0.0148833	1.76051	0.0148833	#N/A	#N/A	#N/A
FosB	11	1420	58	26819	3.071	3.582	0.0002015	4.654						#N/A	#N/A	#N/A
MITF	19	1420	143	26819	7.571	2.509	0.0002018	4.279						2.278	0	0
RBP-J kappa (CBF1)	18	1420	132	26819	6.989	2.575	0.0002116	4.29						3.24	0	0
NFIA	11	1420	59	26819	3.124	3.521	0.000236	4.584						2.761	1.67541	1.6066
NOTCH1 precursor	5	1420	12	26819	0.6354	7.869	0.0002393	5.628						#N/A	#N/A	#N/A
SNAIL1	15	1420	101	26819	5.348	2.805	0.0002725	4.297						#N/A	#N/A	#N/A
FOXP3	29	1420	272	26819	14.4	2.014	0.0002835	3.973						#N/A	#N/A	#N/A
HOXA2	8	1420	34	26819	1.8	4.444	0.0003196	4.751						#N/A	#N/A	#N/A
SOX2	51	1420	588	26819	31.13	1.638	0.0003985	3.699						#N/A	#N/A	#N/A
PRDM5	13	1420	83	26819	4.395	2.958	0.0004038	4.225						2.453	0	0
MCR	6	1420	20	26819	1.059	5.666	0.0004443	4.936						#N/A	#N/A	#N/A
POU4F1	6	1420	20	26819	1.059	5.666	0.0004443	4.936						#N/A	#N/A	#N/A
FOXC2	8	1420	36	26819	1.906	4.197	0.0004848	4.539						3.394	0	0
IRF1	23	1420	203	26819	10.75	2.14	0.0004973	3.855						2.809	0	0
HNF3-alpha	24	1420	217	26819	11.49	2.089	0.0005401	3.808						2.534	0	0
PPAR-beta(delta)	16	1420	119	26819	6.301	2.539	0.0005453	3.979						#N/A	#N/A	#N/A
HOXB8	3	1420	4	26819	0.2118	14.16	0.0005691	6.226						15.27	0	0
LBX1	3	1420	4	26819	0.2118	14.16	0.0005691	6.226						#N/A	#N/A	#N/A
ESR2	18	1420	143	26819	7.571	2.377	0.0005698	3.905						2.99	0	0
Oct-1	21	1420	180	26819	9.531	2.203	0.0005822	3.83						2.263	0	0
SOX4	15	1420	109	26819	5.771	2.599	0.0006268	3.955						3.176	0	0
ATF-1	11	1420	66	26819	3.495	3.148	0.0006455	4.131						#N/A	#N/A	#N/A
TWIST1	16	1420	121	26819	6.407	2.497	0.0006568	3.903	A_33_P3414591	1.29677	0.00275424	1.33354	0.00275424	2.188	0	0
TCF7L1 (TCF3)	12	1420	77	26819	4.077	2.943	0.0006979	4.038						#N/A	#N/A	#N/A
TCF8	14	1420	99	26819	5.242	2.671	0.0007132	3.938	A_33_P3640690	-1.29856	1.40396e-05	-0.440561	1.40396e-05	2.263	0	0
RUNX2	20	1420	171	26819	9.054	2.209	0.0007532	3.75						#N/A	#N/A	#N/A
HEY2	6	1420	22	26819	1.165	5.151	0.0007809	4.605						5.554	0	0
SOX11	7	1420	30	26819	1.588	4.407	0.0007983	4.415						#N/A	#N/A	#N/A
PAX2	7	1420	31	26819	1.641	4.265	0.0009844	4.3						#N/A	#N/A	#N/A
SP7	6	1420	23	26819	1.218	4.927	0.001009	4.455						#N/A	#N/A	#N/A
GFI-1	8	1420	40	26819	2.118	3.777	0.001021	4.156						3.055	0	0
SALL4	16	1420	126	26819	6.671	2.398	0.001024	3.72						#N/A	#N/A	#N/A
ETV2	5	1420	16	26819	0.8472	5.902	0.001105	4.638						#N/A	#N/A	#N/A
KLF6	9	1420	50	26819	2.647	3.4	0.001117	4.016	A_33_P3367615	1.34636	0.000893264	1.45276	0.000893264	3.665	0	0
MEIS2	4	1420	10	26819	0.5295	7.555	0.00127	4.902						#N/A	#N/A	#N/A
SHOX	3	1420	5	26819	0.2647	11.33	0.001366	5.463						#N/A	#N/A	#N/A
c-Myb	19	1420	168	26819	8.895	2.136	0.001504	3.492						#N/A	#N/A	#N/A
HNF1-alpha	26	1420	262	26819	13.87	1.874	0.001629	3.362						2.876	0	0
PU.1	35	1420	390	26819	20.65	1.695	0.001719	3.269						1.932	0	0
IA-1	4	1420	11	26819	0.5824	6.868	0.001913	4.602						#N/A	#N/A	#N/A
FOXK2 (ILF1-4)	5	1420	18	26819	0.9531	5.246	0.001983	4.261						#N/A	#N/A	#N/A
IRF2	11	1420	76	26819	4.024	2.734	0.002126	3.578						3.483	0	0
DAX1	5	1420	19	26819	1.006	4.97	0.002575	4.093						#N/A	#N/A	#N/A
Ikaros	10	1420	67	26819	3.547	2.819	0.002645	3.525						3.039	0	0
NRF2	19	1420	177	26819	9.372	2.027	0.002741	3.243						2.416	0	0
RBMS1	2	1420	2	26819	0.1059	18.89	0.002802	5.981						#N/A	#N/A	#N/A
Foxl1	2	1420	2	26819	0.1059	18.89	0.002802	5.981						#N/A	#N/A	#N/A
TAL1	21	1420	204	26819	10.8	1.944	0.00282	3.201						2.396	0	0
T brachyury protein	9	1420	57	26819	3.018	2.982	0.002882	3.542	A_33_P3709150	-1.24798	0.019056	-1.16576	0.019056	#N/A	#N/A	#N/A
STAT6	23	1420	232	26819	12.28	1.872	0.002963	3.155						#N/A	#N/A	#N/A
CDX2	15	1420	127	26819	6.724	2.231	0.002976	3.287						3.207	0	0
REX1	6	1420	28	26819	1.483	4.047	0.003004	3.814						#N/A	#N/A	#N/A
NF-AT4(NFATC3)	8	1420	47	26819	2.489	3.215	0.003008	3.593						3.466	0	0
TBP	14	1420	115	26819	6.089	2.299	0.003055	3.301						2.656	0	0
CSX (Nkx2.5)	9	1420	58	26819	3.071	2.931	0.003254	3.48						#N/A	#N/A	#N/A
HMGA2	5	1420	20	26819	1.059	4.722	0.003286	3.937						#N/A	#N/A	#N/A
FOXC1	5	1420	20	26819	1.059	4.722	0.003286	3.937						#N/A	#N/A	#N/A
SREBP1 (nuclear)	16	1420	142	26819	7.519	2.128	0.003543	3.187						#N/A	#N/A	#N/A
FOXK1	10	1420	70	26819	3.706	2.698	0.003669	3.364						#N/A	#N/A	#N/A
ATF-5	4	1420	13	26819	0.6883	5.811	0.003806	4.103						#N/A	#N/A	#N/A
HSF1	26	1420	279	26819	14.77	1.76	0.003852	3.017						1.752	0	0
COUP-TFII	12	1420	94	26819	4.977	2.411	0.003984	3.24						2.383	0	0
USF1	22	1420	224	26819	11.86	1.855	0.004032	3.038						2.636	0	0
N-Myc	23	1420	238	26819	12.6	1.825	0.004068	3.023	A_24_P94402	1.18161	9.1138e-05	1.82908	9.1138e-05	#N/A	#N/A	#N/A
TEF-3	10	1420	71	26819	3.759	2.66	0.004072	3.312						2.868	0	0
NF-kB p50/p50	10	1420	71	26819	3.759	2.66	0.004072	3.312	A_23_P30024	-0.752107	1.43928e-07	-1.04143	1.43928e-07	3.729	0	0
RFX1	6	1420	30	26819	1.588	3.777	0.004325	3.599						#N/A	#N/A	#N/A
Vax2	3	1420	7	26819	0.3706	8.094	0.004413	4.439						#N/A	#N/A	#N/A
HNF1-beta	10	1420	72	26819	3.812	2.623	0.00451	3.261						3.677	0	0
DLX4 (BP1)	4	1420	14	26819	0.7413	5.396	0.005108	3.89	A_23_P164196	1.2025	0.000445363	0.630032	0.000445363	#N/A	#N/A	#N/A
Nkx2.2	5	1420	22	26819	1.165	4.292	0.005111	3.653						#N/A	#N/A	#N/A
PTF1-p48	5	1420	22	26819	1.165	4.292	0.005111	3.653						#N/A	#N/A	#N/A
MafB	6	1420	31	26819	1.641	3.655	0.005127	3.498						#N/A	#N/A	#N/A
AML1 (RUNX1)	23	1420	244	26819	12.92	1.78	0.005497	2.895	A_24_P34155	0.735956	1.75697e-06	1.02271	1.75697e-06	2.253	0	0
RUNX3	8	1420	52	26819	2.753	2.906	0.005704	3.252						2.741	0	0
EBF	14	1420	124	26819	6.565	2.132	0.006026	2.988	A_24_P156501	1.5423	0.0493838	0.987549	0.0493838	#N/A	#N/A	#N/A
NF-AT3(NFATC4)	7	1420	42	26819	2.224	3.148	0.006086	3.294						#N/A	#N/A	#N/A
PXR	7	1420	42	26819	2.224	3.148	0.006086	3.294						4.364	0	0
Evi-1	11	1420	87	26819	4.606	2.388	0.006139	3.066						#N/A	#N/A	#N/A
SIP1 (ZFHX1B)	5	1420	23	26819	1.218	4.106	0.00625	3.523	A_33_P3243832; A_23_P142560	1.28037	0.0208992	1.20173	0.0208992	5.312	0	0
TR-beta1	16	1420	151	26819	7.995	2.001	0.006433	2.917						2.427	0	0
CSDA	4	1420	15	26819	0.7942	5.036	0.006676	3.697	A_23_P25224	-1.18475	1.82218e-06	-0.600946	1.82218e-06	#N/A	#N/A	#N/A
ARIX	3	1420	8	26819	0.4236	7.082	0.006785	4.068						#N/A	#N/A	#N/A
KLF7	3	1420	8	26819	0.4236	7.082	0.006785	4.068						#N/A	#N/A	#N/A
C/EBPepsilon	6	1420	33	26819	1.747	3.434	0.007049	3.308						#N/A	#N/A	#N/A
KLF11 (TIEG2)	6	1420	33	26819	1.747	3.434	0.007049	3.308						4.32	0	0
NF-kB1 (p105)	9	1420	66	26819	3.495	2.575	0.007765	3.03	A_23_P30024	-0.752107	1.43928e-07	-1.04143	1.43928e-07	#N/A	#N/A	#N/A
MEF2A	10	1420	78	26819	4.13	2.421	0.007964	2.972						#N/A	#N/A	#N/A
NKRF	2	1420	3	26819	0.1588	12.59	0.008108	4.747						#N/A	#N/A	#N/A
POLR2A	2	1420	3	26819	0.1588	12.59	0.008108	4.747						#N/A	#N/A	#N/A
TBX18	2	1420	3	26819	0.1588	12.59	0.008108	4.747						#N/A	#N/A	#N/A
SOX12	2	1420	3	26819	0.1588	12.59	0.008108	4.747						#N/A	#N/A	#N/A
GLIS1	2	1420	3	26819	0.1588	12.59	0.008108	4.747						13.58	0	0
Glis2	2	1420	3	26819	0.1588	12.59	0.008108	4.747						#N/A	#N/A	#N/A
IRXL1	2	1420	3	26819	0.1588	12.59	0.008108	4.747						#N/A	#N/A	#N/A
MYOD	17	1420	169	26819	8.948	1.9	0.008449	2.775						2.651	0	0
BATF	4	1420	16	26819	0.8472	4.722	0.008533	3.521						#N/A	#N/A	#N/A
TEF-1	9	1420	67	26819	3.547	2.537	0.008559	2.978						2.735	0	0
JunB	14	1420	130	26819	6.883	2.034	0.009054	2.794						2.663	0	0
ATF-4	15	1420	144	26819	7.624	1.967	0.009494	2.752						#N/A	#N/A	#N/A
SOX15	3	1420	9	26819	0.4765	6.296	0.009779	3.757						#N/A	#N/A	#N/A
cKrox	3	1420	9	26819	0.4765	6.296	0.009779	3.757						9.051	0	0
FoxD1	3	1420	9	26819	0.4765	6.296	0.009779	3.757						#N/A	#N/A	#N/A
REV-ERBalpha	7	1420	46	26819	2.436	2.874	0.01006	3.008						#N/A	#N/A	#N/A
ERM	4	1420	17	26819	0.9001	4.444	0.0107	3.358						#N/A	#N/A	#N/A
ER81	5	1420	26	26819	1.377	3.632	0.01071	3.175	A_33_P3401156; A_32_P78491	-1.09783	7.21886e-07	-1.36282	7.21886e-07	#N/A	#N/A	#N/A
ARX	5	1420	26	26819	1.377	3.632	0.01071	3.175						#N/A	#N/A	#N/A
NeuroD1 (NDF1)	9	1420	70	26819	3.706	2.428	0.01131	2.829	A_33_P3285965	0.974209	0.0272389	1.55964	0.0272389	#N/A	#N/A	#N/A
ChREBP	9	1420	71	26819	3.759	2.394	0.01236	2.781						3.155	0	0
ZNF281	6	1420	37	26819	1.959	3.063	0.01237	2.969						#N/A	#N/A	#N/A
GLI-2	7	1420	48	26819	2.541	2.754	0.01263	2.876						#N/A	#N/A	#N/A
IRF4	34	1420	429	26819	22.71	1.497	0.01292	2.453						#N/A	#N/A	#N/A
ZNF288	4	1420	18	26819	0.9531	4.197	0.01319	3.208						#N/A	#N/A	#N/A
POU4F2	4	1420	18	26819	0.9531	4.197	0.01319	3.208						#N/A	#N/A	#N/A
EGR4	3	1420	10	26819	0.5295	5.666	0.01343	3.489						#N/A	#N/A	#N/A
CDX1	6	1420	38	26819	2.012	2.982	0.01405	2.891						4.287	2.01595	2.09481
BACH1	6	1420	38	26819	2.012	2.982	0.01405	2.891						#N/A	#N/A	#N/A
TBX3	7	1420	49	26819	2.594	2.698	0.01408	2.813						#N/A	#N/A	#N/A
T-bet	7	1420	49	26819	2.594	2.698	0.01408	2.813						3.325	0	0
POU3F2 (BRN2)	11	1420	98	26819	5.189	2.12	0.01455	2.626						#N/A	#N/A	#N/A
NF-AT1(NFATC2)	11	1420	98	26819	5.189	2.12	0.01455	2.626						3.74	0	0
EKLF1	8	1420	61	26819	3.23	2.477	0.01472	2.731						#N/A	#N/A	#N/A
DBP	31	1420	387	26819	20.49	1.513	0.01483	2.403						1.842	0	0
Scleraxis	2	1420	4	26819	0.2118	9.443	0.01565	3.993						15.27	0	0
BARX1	2	1420	4	26819	0.2118	9.443	0.01565	3.993						10.18	0	0
HAND1	2	1420	4	26819	0.2118	9.443	0.01565	3.993						#N/A	#N/A	#N/A
DPF2	2	1420	4	26819	0.2118	9.443	0.01565	3.993						#N/A	#N/A	#N/A
NRL	7	1420	50	26819	2.647	2.644	0.01565	2.751						4.073	0	0
CUX1	6	1420	39	26819	2.065	2.906	0.01588	2.816						#N/A	#N/A	#N/A
SLUG	8	1420	62	26819	3.283	2.437	0.01614	2.678	A_23_P169039	1.69432	9.65895e-06	1.3538	9.65895e-06	#N/A	#N/A	#N/A
MYOG	25	1420	299	26819	15.83	1.579	0.01664	2.381						#N/A	#N/A	#N/A
COUP-TFI	9	1420	75	26819	3.971	2.266	0.01731	2.597						#N/A	#N/A	#N/A
RelB (NF-kB subunit)	18	1420	197	26819	10.43	1.726	0.01737	2.417						2.067	0	0
BMAL1	12	1420	114	26819	6.036	1.988	0.01767	2.5						#N/A	#N/A	#N/A
EBF2	3	1420	11	26819	0.5824	5.151	0.01774	3.256						#N/A	#N/A	#N/A
FOXP1	6	1420	40	26819	2.118	2.833	0.01787	2.743	A_23_P155257	-1.23288	1.72145e-10	-1.14249	1.72145e-10	3.564	0	0
FOXD3	6	1420	40	26819	2.118	2.833	0.01787	2.743						#N/A	#N/A	#N/A

## Sheet: SW620_Pathway
Enrichment analysis report
Enrichment by Pathway Maps					SW620 filtered 2 fold ANOVA COMPOUND 1
#	Maps	Total	min(pValue)	Min FDR	p-value	FDR	In Data	Network Objects from Active Data	Colo205	Baseline
1	Bone metastases in Prostate Cancer	29	5.49132e-09	5.42542e-06	5.49132e-09	5.42542e-06	12	PTHR1, PTHrP, ErbB2, Osteoprotegerin, Endothelin-1, WNT7B, WNT, SDF-1, CXCR4, Frizzled, DKK1, IBP3	#N/A	#N/A
2	Protein folding and maturation_Insulin processing	20	1.96866e-07	9.72518e-05	1.96866e-07	9.72518e-05	9	Diarginyl insulin, Proinsulin C-peptide, Insulin, Des (64,65) proinsulin, Split (32,33) proinsulin, Insulin processed, Split (64,65) proinsulin, Proinsulin, Des(31,32) proinsulin	#N/A	#N/A
3	Development_Regulation of epithelial-to-mesenchymal transition (EMT)	64	4.43832e-07	0.000146169	4.43832e-07	0.000146169	15	Oncostatin M, VE-cadherin, N-cadherin, Occludin, TGF-beta 2, ACTA2, PDGF-R-alpha, TWIST1, Endothelin-1, TCF8, WNT, SLUG, Frizzled, Bcl-2, SIP1 (ZFHX1B)	PDGF-A, IL-1 beta, Oncostatin M, HEY1, N-cadherin, NOTCH4, ACTA2, PDGF-R-alpha, Endothelin-1, Fibronectin, Claudin-1, WNT, Frizzled, c-Jun	#N/A
4	Cell adhesion_Gap junctions	30	1.14978e-06	0.000283994	1.14978e-06	0.000283994	10	Tubulin beta, Occludin, ZO-3, Tubulin alpha, Connexin 46, Connexin 26, Actin, Connexin 31, Connexin 43, Tubulin (in microtubules)	#N/A	#N/A
5	WNT signaling in HCC	40	2.87087e-06	0.000567285	2.87087e-06	0.000567285	11	WNT4, LGR5, WNT7B, WNT3A, Tcf(Lef), SFRP2, WNT, TCF7L2 (TCF4), Frizzled, DKK1, DACT1	Cyclin D1, WNT3A, SFRP2, c-Myc, FZD7, WNT, GLNA, Frizzled	WNT4, Ep-CAM, NOTUM, p14ARF, FZD6, Tcf(Lef), EGFR, GLNA, DKK1, WNT3, FZD3, Dsh, SFRP5, WNT, Cyclin D1, LGR5, p53, c-Myc, FZD7, DVL-2, Axin, TBX3, Frizzled, DACT1
6	Canonical WNT signaling pathway in colorectal cancer	66	3.85113e-06	0.000634153	3.85113e-06	0.000634153	14	WNT4, FZD1, iNOS, ENC1, CAS-L, CD44, SFRP2, WNT, SLUG, DACT3, TCF7L2 (TCF4), Frizzled, DKK1, WNT6	FZD1, Cyclin D1, CAS-L, p21, Leptin receptor, CD44, FZD10, SFRP2, c-Myc, FZD7, WNT, DACT3, Frizzled	#N/A
7	Role of osteoblasts in bone lesions formation in multiple myeloma	35	5.59307e-06	0.000690744	5.59307e-06	0.000690744	10	Apo-2L(TNFSF10), Osteoprotegerin, WNT3A, SFRP2, WNT, BMP2, Frizzled, Collagen I, FasR(CD95), DKK1	FasL(TNFSF6), Osteoprotegerin, WNT3A, MIP-1-alpha, SFRP2, WNT, Frizzled, Collagen I	#N/A
8	Development_TGF-beta-dependent induction of EMT via SMADs	35	5.59307e-06	0.000690744	5.59307e-06	0.000690744	10	N-cadherin, Occludin, TGF-beta 2, TGF-beta, SMAD3, TWIST1, Endothelin-1, TCF8, SLUG, SIP1 (ZFHX1B)	#N/A	HEY1, E-cadherin, TGF-beta 1, E2A, ETS1, TGF-beta receptor type II, Lef-1, TGF-beta, SMAD4, Vimentin, TCF8, Claudin-1, SLUG, Occludin, HMGA2, SNAIL1, SMAD3, Jagged1, PAI1
9	Beta-catenin-dependent transcription regulation in colorectal cancer	36	7.39944e-06	0.000771643	7.39944e-06	0.000771643	10	PLAUR (uPAR), CD44, Progastrin, IL-8, NRCAM, CD44 soluble, TCF7L2 (TCF4), MDR1, L1CAM, CD44 (EXT)	c-Jun/c-Fos, Cyclin D1, CD44, Claudin-1, CD44 soluble, PLAU (UPA), MDR1, CD44 (EXT)	#N/A
10	Hedgehog signaling in gastric cancer	29	7.81015e-06	0.000771643	7.81015e-06	0.000771643	9	N-cadherin, MSX-2, PTCH1, ROBO1, SUFU, SLUG, Smoothened, SIP1 (ZFHX1B), MEF2C	#N/A	#N/A
11	Th17 cells in CF	54	1.14399e-05	0.00102751	1.14399e-05	0.00102751	12	CFTR, CCL20, GRO-1, NF-kB, IL-21 receptor, GCP2, ROR-alpha, LBP, IL-8, JAK3, TLR4, MD-2	#N/A	#N/A
12	Development_Neural stem cell lineage commitment (schema)	38	1.25639e-05	0.00103443	1.25639e-05	0.00103443	10	DLL1, MAP-1B, PDGF-R-alpha, PTCH1, WNT7A, S100B, MAP2, BMP2, CSPG4 (NG2), Smoothened	#N/A	#N/A
13	SHH signaling in colorectal cancer	31	1.4364e-05	0.00109166	1.4364e-05	0.00109166	9	PDGF-R-alpha, PTCH1, SUFU, WNT, TCF7L2 (TCF4), Frizzled, Smoothened, Bcl-2, SIP1 (ZFHX1B)	#N/A	#N/A
14	DKK1 signaling in multiple myeloma	19	2.32504e-05	0.00164081	2.32504e-05	0.00164081	7	Osteoprotegerin, Krm2, WNT3A, Tcf(Lef), BMP2, Frizzled, DKK1	#N/A	#N/A
15	WNT signaling in gastric cancer	36	5.35398e-05	0.00330608	5.35398e-05	0.00330608	9	CD44, WNT3A, DKK3, Tcf(Lef), WNT7A, SFRP2, WNT, TCF7L2 (TCF4), Frizzled	Cyclin D1, CD44, WNT3A, DKK3, SFRP2, WNT, WNT 8A, Frizzled	#N/A
16	E-cadherin signaling and its regulation in gastric cancer	36	5.35398e-05	0.00330608	5.35398e-05	0.00330608	9	TWIST1, Plakoglobin, TCF8, WNT, Actin, SLUG, BMP2, Frizzled, SIP1 (ZFHX1B)	#N/A	#N/A
17	TGF-beta signaling via SMADs in breast cancer	47	9.14446e-05	0.00531455	9.14446e-05	0.00531455	10	TGF-beta 2, PTHrP, SMAD3, CTGF, TWIST1, CD44, IL-8, SLUG, CD44 soluble, TBX2	#N/A	#N/A
18	Development_Regulation of cytoskeleton proteins in oligodendrocyte differentiation and myelination	58	0.000124127	0.00681319	0.000124127	0.00681319	11	Tubulin beta, Tubulin alpha, MAP-1B, NCAM1, MAP4, PDGF-R-alpha, Gelsolin, MAP2, MRLC, L1CAM, Tubulin (in microtubules)	PDGF-A, Tau (MAPT), MAP6, MAP-1B, NCAM1, PDGF-R-alpha, MAP2, MRLC, Paxillin, TPPP (p24)	Tubulin beta, CDK5R1 (p35), MAP-1B, NCAM1, chTOG, PDGF-A, Myosin II, HDAC6, LIMK1, hnRNP A2, Gelsolin, VAV-1, Paxillin, Myelin basic protein, Tubulin alpha, MAP4, CNP1, Netrin-1, N-WASP, MRLC, L1CAM, TPPP (p24), CDC42, Fyn, Tau (MAPT), MELC, WASF1(WAVE1), Cofilin, Tubulin (in microtubules)
19	Th17 cells in CF (mouse model)	49	0.000132553	0.00689277	0.000132553	0.00689277	10	CFTR, GRO-1, NF-kB, SMAD3, IL-21 receptor, GCP2, LBP, JAK3, TLR4, MD-2	#N/A	#N/A
20	Stem cells_Cooperation between Hedgehog, IGF-2 and HGF signaling pathways in medulloblastoma stem cells	32	0.000139951	0.00691358	0.000139951	0.00691358	8	PTCH1, IRS-1, Tcf(Lef), IGF-2, N-Myc, TCF7L2 (TCF4), Smoothened, Bcl-2	#N/A	#N/A
21	Role of stellate cells in progression of pancreatic cancer	60	0.000170548	0.00802389	0.000170548	0.00802389	11	COL1A1, HB-EGF, GRO-2, ACTA2, COL1A2, SMAD3, CTGF, PDGF-R-alpha, PDGF receptor, IL-8, Collagen I	COL1A1, PDGF-A, HB-EGF, GRO-2, ACTA2, COL1A2, PDGF-R-alpha, c-Fos, PDGF receptor, Fibronectin, Collagen I, c-Jun	#N/A
22	Development_Oligodendrocyte differentiation from adult stem cells	51	0.000188263	0.00845471	0.000188263	0.00845471	10	MCT8, Noggin, FGFR3, PDGF-R-alpha, PTCH1, Endothelin-1, TAT1, BMP2, CSPG4 (NG2), Smoothened	#N/A	#N/A
23	Development_WNT signaling pathway. Part 2	53	0.000262445	0.0112737	0.000262445	0.0112737	10	ENC1, CD44, Progastrin, Tcf(Lef), WNT, SLUG, NRCAM, TCF7L2 (TCF4), Frizzled, DKK1	#N/A	#N/A
24	Development_Hedgehog and PTH signaling pathways in bone and cartilage development	36	0.000337079	0.0138764	0.000337079	0.0138764	8	PTHR1, COL1A1, EGR1, PTHrP, COL1A2, PTCH1, VDR, Smoothened	PTHR1, COL1A1, Cyclin D1, PKA-reg (cAMP-dependent), COL1A2, c-Fos, PLC-beta, PTCH1, VDR, PKA-cat (cAMP-dependent)	#N/A
25	Immune response_Generation of memory CD4+ T cells	37	0.000411408	0.0162187	0.000411408	0.0162187	8	IL-7 receptor, IL7RA, NF-kB, IL4RA, CD44, IL-4R type I, JAK3, Bcl-2	#N/A	#N/A
26	Role of activation of WNT signaling in the progression of lung cancer	77	0.000426808	0.0162187	0.000426808	0.0162187	12	WNT4, FZD1, Sirtuin1, iNOS, WNT3A, DKK3, Tcf(Lef), SFRP2, WNT, TCF7L2 (TCF4), Frizzled, DKK1	FZD1, Cyclin D1, p21, WNT3A, DKK3, NKD1, SFRP2, c-Myc, FZD7, WNT, Frizzled, NOTCH3	WNT4, E-cadherin, iNOS, RUNX3, FZD6, NKD1, Tcf(Lef), Krm1, Porcn, Lef-1, DKK1, WNT3, FZD3, p21, Dsh, JNK1(MAPK8), SFRP5, Sirtuin1, Survivin, WNT, FZD5, LRP6, FZD1, Cyclin D1, FZD9, HOXB9, c-Myc, FZD7, DVL-2, p38 MAPK, Axin, CD147, Frizzled, NOTCH3
27	WNT signaling in proliferative-type melanoma cells	38	0.000498523	0.0182423	0.000498523	0.0182423	8	WNT7B, WNT3A, DKK3, WNT, NRCAM, Frizzled, DKK1, DACT1	TAJ(TNFRSF19), Cyclin D1, WNT3A, DKK3, Fibronectin, c-Myc, WNT, Frizzled	#N/A
28	Neuroendocrine transdifferentiation in Prostate Cancer	48	0.000556565	0.0189454	0.000556565	0.0189454	9	HB-EGF, Chromogranin A, PTHrP, NeuroD1 (NDF1), Progastrin, Tcf(Lef), AMACR, IL-8, TCF7L2 (TCF4)	#N/A	#N/A
29	Inhibition of Ephrin receptors in colorectal cancer	30	0.000579574	0.0189454	0.000579574	0.0189454	7	Ephrin-A receptors, SMAD3, Ephrin-A receptor 1, WNT, Ephrin-B receptors, TCF7L2 (TCF4), Frizzled	#N/A	#N/A
30	Expression targets of Tissue factor signaling in cancer	22	0.000588733	0.0189454	0.000588733	0.0189454	6	PLAUR (uPAR), GRO-1, CTGF, CSF1, IL-8, Coagulation factor V	#N/A	IL-8, PAR2, Coagulation factor X, Tissue factor, Coagulation factor V, PLAU (UPA), GRO-1, Thrombin, GM-CSF, NFKBIE, Cyr61, PLAUR (uPAR), PAR1, CTGF, PAI1
31	Stem cells_Aberrant Hedgehog signaling in medulloblastoma stem cells	15	0.000623082	0.0189454	0.000623082	0.0189454	5	PTCH1, SUFU, IGF-2, N-Myc, Smoothened	#N/A	#N/A
32	Hypoxia-induced EMT in cancer and fibrosis	9	0.000651509	0.0189454	0.000651509	0.0189454	4	CTGF, Lysyl oxidase, TWIST1, LOXL2	#N/A	#N/A
33	Mechanisms of drug resistance in multiple myeloma	49	0.000651968	0.0189454	0.000651968	0.0189454	9	CD44, GCR-alpha, WNT3A, HES1, IL-8, TCF7L2 (TCF4), Frizzled, Bcl-2, MDR1	Cyclin D1, HAS1, p21, CD44, WNT3A, IL8RA, HES1, c-Myc, Frizzled, MDR1	#N/A
34	Immune response_Bacterial infections in normal airways	49	0.000651968	0.0189454	0.000651968	0.0189454	9	CFTR, NF-kB, iNOS, LBP, IL-8, TLR4, IL1RAP, FasR(CD95), MD-2	#N/A	#N/A
35	Development_Regulation of lung epithelial progenitor cell differentiation	41	0.000852896	0.0222445	0.000852896	0.0222445	8	ELF5, WNT3A, Tcf(Lef), GATA-6, WNT, N-Myc, Frizzled, FOXP1	#N/A	#N/A
36	Breast cancer (general schema)	41	0.000852896	0.0222445	0.000852896	0.0222445	8	PTHR1, DLL1, TGF-beta, PTHrP, Somatotropin, ErbB2, PTCH1, Smoothened	#N/A	#N/A
37	Cytoskeleton remodeling_Substance P mediated membrane blebbing	16	0.000869106	0.0222445	0.000869106	0.0222445	5	Tubulin alpha, Dynamin, MLCK, MRLC, Tubulin (in microtubules)	#N/A	#N/A
38	Cell cycle_Role of Nek in cell cycle regulation	32	0.000878073	0.0222445	0.000878073	0.0222445	7	NEK1, Tubulin beta, Tubulin alpha, Insulin processed, IRS-1, Histone H1, Tubulin (in microtubules)	#N/A	Tubulin beta, PI3K cat class IA, Histone H3, IRS-1, MAD2a, NEK6, RCC1, Nek11, Aurora-A, CDK1 (p34), MAD1 (mitotic checkpoint), Tubulin alpha, PI3K reg class IA, Insulin receptor, NEK1, TPX2, Histone H1, Tubulin (in microtubules)
39	Upregulation of IL-8 expression in colorectal cancer	32	0.000878073	0.0222445	0.000878073	0.0222445	7	WNT4, NF-kB1 (p50), IL-8, WNT, TCF7L2 (TCF4), Frizzled, WNT6	#N/A	#N/A
40	Cell adhesion_ECM remodeling	52	0.00102107	0.0252205	0.00102107	0.0252205	9	HB-EGF, PLAUR (uPAR), Collagen IV, CD44, Kallikrein 1, IL-8, IGF-2, Collagen I, Versican	HB-EGF, Collagen II, CD44, TIMP2, IL8RA, Fibronectin, Nidogen, PLAU (UPA), Collagen I, Versican	Laminin 5, CD44, SERPINE2, MMP-1, IL-8, EGFR, Laminin 1, Versican, IBP4, IL8RA, Nidogen, PLAU (UPA), Kallikrein 3 (PSA), Vitronectin, PLAT (TPA), MSN (moesin), MMP-15, MMP-14, PLAUR (uPAR), Collagen II, Collagen IV, TIMP2, IGF-1, Kallikrein 1, PAI1
41	SHH signaling in melanoma	33	0.0010669	0.0257098	0.0010669	0.0257098	7	N-cadherin, SMAD3, PDGF-R-alpha, PTCH1, SUFU, SLUG, Smoothened	#N/A	#N/A
42	Role of adhesion of SCLC cells in tumor progression	35	0.00153924	0.0362088	0.00153924	0.0362088	7	N-cadherin, PTHrP, NCAM1, Collagen IV, SDF-1, CXCR4, ACM3	#N/A	#N/A
43	Role of cell adhesion molecules in progression of pancreatic cancer	45	0.00161256	0.0370513	0.00161256	0.0370513	8	p130CAS, iNOS, NCAM1, Plakoglobin, Collagen IV, Tcf(Lef), Collagen I, L1CAM	#N/A	#N/A
44	Airway smooth muscle contraction in asthma	56	0.00175913	0.0376555	0.00175913	0.0376555	9	L-type Ca(II) channel, alpha 1C subunit, GEFT, BDKRB2, Telokin, MyHC, MLCK, MRLC, IP3 receptor, ACM3	L-type Ca(II) channel, alpha 1C subunit, GEFT, PKA-reg (cAMP-dependent), Telokin, PLC-beta, MyHC, Adenylate cyclase, PKA-cat (cAMP-dependent), MLCK, MRLC, IP3 receptor	#N/A
45	Development_YAP/TAZ-mediated co-regulation of transcription	56	0.00175913	0.0376555	0.00175913	0.0376555	9	ID3, HBP17, SMAD3, CTGF, TWIST1, Endothelin-1, Endothelin-2, SLUG, SIP1 (ZFHX1B)	#N/A	#N/A
46	Inflammatory mechanisms of pancreatic cancerogenesis	67	0.00177622	0.0376555	0.00177622	0.0376555	10	IL-32 (NK4), CCL20, GRO-1, NF-kB, iNOS, IL-8, TLR4, SDF-1, CXCR4, Bcl-2	IL-1 beta, C/EBP, TNF-R2, c-Jun/c-Fos, CCL20, AP-1, TGF-alpha, GRO-1, c-Fos, ICAM1, IL8RA, PLAU (UPA), c-Jun	#N/A
47	Cytoskeleton remodeling_Keratin filaments	36	0.00182942	0.0376555	0.00182942	0.0376555	7	Tubulin beta, Keratin 17, Epiplakin, BPAG1, Tubulin alpha, Keratin 5, Tubulin (in microtubules)	#N/A	#N/A
48	Cell adhesion_Tight junctions	36	0.00182942	0.0376555	0.00182942	0.0376555	7	Occludin, ZO-3, MUPP1, CSDA, Tcf(Lef), Actin, Claudin-7	#N/A	#N/A
49	Canonical Notch signaling pathway in colorectal cancer	47	0.00215401	0.0434318	0.00215401	0.0434318	8	DLL1, CD44, TLE1, HES1, WNT, NUMB, Keratin 20, TCF7L2 (TCF4)	#N/A	#N/A
50	Tumor-stroma interactions in pancreatic cancer	28	0.002299	0.0454282	0.002299	0.0454282	6	COL1A2, PTCH1, SUFU, Smoothened, Collagen I, Thrombospondin 2	#N/A	#N/A

## Sheet: Colo205_Transcription factor
Colo205														SW620
Network Object Name	Actual	n	R	N	Expected	Ratio	p-value	z-score	Input IDs	Signal 2h	p-value	Signal 6h	p-value	Enrichment	Signal 2h	Signal 6h
c-Jun	98	1317	795	26819	39.04	2.51	4.079e-17	9.823	A_33_P3323298	-1.1281	5.10609e-08	-1.02799	5.10609e-08	2.233	0	0
GCR-alpha	122	1317	1150	26819	56.47	2.16	6.51e-16	9.14						2.398	1.55412	0.529388
SP1	146	1317	1593	26819	78.23	1.866	1.522e-13	8.102						2.087	0	0
C/EBPbeta	72	1317	609	26819	29.91	2.408	5.203e-12	7.985						2.295	0	0
C/EBPalpha	51	1317	374	26819	18.37	2.777	4.352e-11	7.864	A_24_P224727	1.83728	4.47431e-09	1.92248	4.47431e-09	2.777	0	0
LHX2	51	1317	377	26819	18.51	2.755	5.842e-11	7.798						2.104	-1.48879	-0.325228
HIF1A	72	1317	650	26819	31.92	2.256	1.072e-10	7.365						2.034	0	0
p53	107	1317	1209	26819	59.37	1.802	2.439e-09	6.487						1.828	0	0
SP3	58	1317	511	26819	25.09	2.311	2.894e-09	6.801						2.218	0	0
HNF1-alpha	37	1317	262	26819	12.87	2.876	7.71e-09	6.934						1.874	0	0
PR (nuclear)	37	1317	263	26819	12.92	2.865	8.556e-09	6.907						2.585	0	0
Androgen receptor	89	1317	973	26819	47.78	1.863	1.243e-08	6.229						2.213	0	0
STAT1	43	1317	340	26819	16.7	2.575	1.429e-08	6.644						2.278	0	0
SRF	48	1317	405	26819	19.89	2.413	1.72e-08	6.514						2.378	0	0
RelA (p65 NF-kB subunit)	81	1317	865	26819	42.48	1.907	2.069e-08	6.161						2.009	0	0
STAT3	63	1317	623	26819	30.59	2.059	5.147e-08	6.079						2.547	0	0
VDR	32	1317	232	26819	11.39	2.809	1.356e-07	6.288	A_23_P162589	1.23032	1.30886e-12	1.04986	1.30886e-12	2.849	-0.477792	-1.0289
c-Fos	41	1317	342	26819	16.79	2.441	1.366e-07	6.096	A_23_P106194	0.578828	0.000248468	1.06943	0.000248468	2.761	0	0
FKHR	35	1317	268	26819	13.16	2.659	1.407e-07	6.205	A_24_P22079	1.01202	2.16659e-07	0.945315	2.16659e-07	2.607	0	0
GATA-3	63	1317	642	26819	31.53	1.998	1.525e-07	5.818						1.736	0	0
TCF7L2 (TCF4)	43	1317	371	26819	18.22	2.36	1.772e-07	5.995						2.393	-0.287335	-1.28845
ESR1 (nuclear)	101	1317	1249	26819	61.33	1.647	5.662e-07	5.319						1.784	0	0
IRF1	28	1317	203	26819	9.969	2.809	8.064e-07	5.879						2.14	0	0
C/EBPdelta	24	1317	160	26819	7.857	3.055	1.065e-06	5.923						2.715	0	0
NF-AT1(NFATC2)	18	1317	98	26819	4.812	3.74	1.203e-06	6.176						2.12	0	0
AHR	32	1317	257	26819	12.62	2.536	1.378e-06	5.621						2.499	0	0
RBP-J kappa (CBF1)	21	1317	132	26819	6.482	3.24	1.879e-06	5.862						2.575	0	0
USF1	29	1317	224	26819	11	2.636	1.928e-06	5.589						1.855	0	0
SMAD3	31	1317	253	26819	12.42	2.495	2.813e-06	5.43						2.911	-1.61786	-1.56408
FOXO3A	26	1317	193	26819	9.478	2.743	3.075e-06	5.524						2.74	0	0
CDX2	20	1317	127	26819	6.237	3.207	3.849e-06	5.665						2.231	0	0
ATF-3	21	1317	139	26819	6.826	3.077	4.383e-06	5.578						3.669	0	0
SMAD1	20	1317	131	26819	6.433	3.109	6.248e-06	5.499						4.325	0	0
ESR2	21	1317	143	26819	7.022	2.99	6.913e-06	5.424						2.377	0	0
NF-AT2(NFATC1)	19	1317	121	26819	5.942	3.198	6.963e-06	5.506						3.122	0	0
HNF3-alpha	27	1317	217	26819	10.66	2.534	9.071e-06	5.155						2.089	0	0
p63	42	1317	429	26819	21.07	1.994	1.847e-05	4.715						3.038	0	0
RARalpha	20	1317	141	26819	6.924	2.888	1.914e-05	5.109						3.081	0	0
RXRA	23	1317	177	26819	8.692	2.646	2.025e-05	4.993						2.668	0	0
SOX4	17	1317	109	26819	5.353	3.176	2.284e-05	5.173						2.599	0	0
SMAD2	20	1317	143	26819	7.022	2.848	2.359e-05	5.036						3.17	0	0
Fra-2	14	1317	79	26819	3.879	3.609	2.756e-05	5.277						3.586	0	0
MYOD	22	1317	169	26819	8.299	2.651	2.955e-05	4.893						1.9	0	0
Lef-1	20	1317	147	26819	7.219	2.771	3.539e-05	4.892						2.57	0	0
NF-kB p50/p50	13	1317	71	26819	3.487	3.729	3.7e-05	5.232						2.66	-0.752107	-1.04143
EGR1	42	1317	442	26819	21.71	1.935	3.72e-05	4.504						2.179	-1.5235	-1.51467
HNF1-beta	13	1317	72	26819	3.536	3.677	4.315e-05	5.168						2.623	0	0
SMAD4	26	1317	224	26819	11	2.364	4.442e-05	4.657						3.12	0	0
SOX9	20	1317	150	26819	7.366	2.715	4.743e-05	4.787						2.77	0	0
GATA-2	24	1317	201	26819	9.871	2.431	5.468e-05	4.629						2.725	0	0
BAPX1	12	1317	64	26819	3.143	3.818	5.735e-05	5.13						3.541	0	0
PAX5	19	1317	141	26819	6.924	2.744	6.279e-05	4.719						2.679	0	0
YB-1	18	1317	130	26819	6.384	2.82	6.778e-05	4.726						#N/A	#N/A	#N/A
TAL1	24	1317	204	26819	10.02	2.396	6.931e-05	4.547						1.944	0	0
AML1 (RUNX1)	27	1317	244	26819	11.98	2.253	7.345e-05	4.469						1.78	0.735956	1.02271
ETS1	37	1317	383	26819	18.81	1.967	7.491e-05	4.333						2.564	0	0
IRF2	13	1317	76	26819	3.732	3.483	7.747e-05	4.927						2.734	0	0
AP-2E	4	1317	6	26819	0.2946	13.58	8.019e-05	7.001						#N/A	#N/A	#N/A
JunD	23	1317	194	26819	9.527	2.414	8.643e-05	4.493						2.434	0	0
FOXQ1 (HFH1)	5	1317	11	26819	0.5402	9.256	0.0001021	6.224						10.3	0	0
SMAD5	13	1317	78	26819	3.83	3.394	0.0001021	4.812						4.601	0	0
WT1	21	1317	171	26819	8.397	2.501	0.0001043	4.474						2.982	0	0
PU.1	37	1317	390	26819	19.15	1.932	0.0001087	4.213						1.695	0	0
PPAR-gamma	31	1317	305	26819	14.98	2.07	0.0001115	4.27						2.105	0	0
CAR	7	1317	24	26819	1.179	5.939	0.0001122	5.501						#N/A	#N/A	#N/A
FOXP2	23	1317	199	26819	9.772	2.354	0.0001273	4.355						2.373	0	0
E2A	16	1317	113	26819	5.549	2.883	0.0001291	4.559						#N/A	#N/A	#N/A
NRL	10	1317	50	26819	2.455	4.073	0.0001341	4.942						2.644	0	0
SOX6	7	1317	25	26819	1.228	5.702	0.0001492	5.345						#N/A	#N/A	#N/A
KLF4	31	1317	310	26819	15.22	2.036	0.0001498	4.171						2.62	0	0
ETS2	17	1317	127	26819	6.237	2.726	0.0001627	4.43						3.123	0	0
PXR	9	1317	42	26819	2.062	4.364	0.0001658	4.958						3.148	0	0
NRF2	21	1317	177	26819	8.692	2.416	0.0001704	4.295						2.027	0	0
HNF3-beta	29	1317	288	26819	14.14	2.051	0.0002143	4.073						2.754	0	0
JunB	17	1317	130	26819	6.384	2.663	0.0002165	4.319						2.034	0	0
ERG	14	1317	97	26819	4.763	2.939	0.0002724	4.348						3.505	0	0
NF-kB1 (p50)	40	1317	457	26819	22.44	1.782	0.00032	3.834						1.901	-0.752107	-1.04143
DBP	35	1317	387	26819	19	1.842	0.0004059	3.79						1.513	0	0
HNF4-alpha	43	1317	510	26819	25.04	1.717	0.0004306	3.715						1.889	0	0
CDX1	8	1317	38	26819	1.866	4.287	0.0004331	4.608	A_23_P58788	2.01595	0.00021242	2.09481	0.00021242	2.982	0	0
RARgamma	11	1317	68	26819	3.339	3.294	0.0004474	4.304						#N/A	#N/A	#N/A
HOXB8	3	1317	4	26819	0.1964	15.27	0.0004553	6.487						14.16	0	0
Scleraxis	3	1317	4	26819	0.1964	15.27	0.0004553	6.487						9.443	0	0
TR-beta1	18	1317	151	26819	7.415	2.427	0.0004554	3.997						2.001	0	0
TFII-I	14	1317	103	26819	5.058	2.768	0.0005103	4.085						#N/A	#N/A	#N/A
TBP	15	1317	115	26819	5.647	2.656	0.0005116	4.045						2.299	0	0
HEY2	6	1317	22	26819	1.08	5.554	0.0005243	4.856						5.151	0	0
Oct-1	20	1317	180	26819	8.839	2.263	0.0005693	3.863						2.203	0	0
cKrox	4	1317	9	26819	0.442	9.051	0.0005978	5.489						6.296	0	0
ChREBP	11	1317	71	26819	3.487	3.155	0.0006535	4.132						2.394	0	0
KLF6	9	1317	50	26819	2.455	3.665	0.0006548	4.287						3.4	1.34636	1.45276
IRF8	25	1317	251	26819	12.33	2.028	0.0006633	3.719						2.709	0	0
SIP1 (ZFHX1B)	6	1317	23	26819	1.129	5.312	0.00068	4.702						4.106	1.28037	1.20173
HOXC6	6	1317	23	26819	1.129	5.312	0.00068	4.702						6.569	0	0
AP-4	10	1317	61	26819	2.996	3.338	0.000722	4.155						3.715	-0.153864	-2.45891
GATA-6	15	1317	119	26819	5.844	2.567	0.0007363	3.893						2.857	-1.28849	-1.59609
EGR2 (Krox20)	14	1317	107	26819	5.254	2.664	0.0007521	3.92	A_23_P46936	-1.17439	2.68896e-06	-1.64887	2.68896e-06	2.824	2.45296	1.34927
c-Rel (NF-kB subunit)	22	1317	212	26819	10.41	2.113	0.0007903	3.698						#N/A	#N/A	#N/A
IRF9	6	1317	24	26819	1.179	5.091	0.0008693	4.556						#N/A	#N/A	#N/A
GFI1B	6	1317	24	26819	1.179	5.091	0.0008693	4.556	A_23_P216845	-1.0566	0.00129206	-0.720776	0.00129206	#N/A	#N/A	#N/A
Oct-2	8	1317	42	26819	2.062	3.879	0.0008783	4.243						#N/A	#N/A	#N/A
ELF3	7	1317	33	26819	1.621	4.32	0.0009402	4.336						5.151	0	0
KLF11 (TIEG2)	7	1317	33	26819	1.621	4.32	0.0009402	4.336						3.434	0	0
Myocardin	3	1317	5	26819	0.2455	12.22	0.001096	5.701						#N/A	#N/A	#N/A
FLI1	14	1317	112	26819	5.5	2.545	0.001184	3.725						3.035	0	0
Pitx2	10	1317	65	26819	3.192	3.133	0.001201	3.912						4.358	0	0
NRSF	37	1317	444	26819	21.8	1.697	0.001287	3.365						2.084	0	0
EPAS1	19	1317	179	26819	8.79	2.162	0.001337	3.543						3.165	0	0
KLF5	10	1317	66	26819	3.241	3.085	0.001354	3.855						#N/A	#N/A	#N/A
RARbeta	7	1317	35	26819	1.719	4.073	0.001359	4.134						4.857	0	0
Aiolos	4	1317	11	26819	0.5402	7.405	0.001447	4.828						#N/A	#N/A	#N/A
Ikaros	10	1317	67	26819	3.29	3.039	0.001522	3.798						2.819	0	0
PIT1	7	1317	36	26819	1.768	3.96	0.001616	4.038						#N/A	#N/A	#N/A
RelB (NF-kB subunit)	20	1317	197	26819	9.674	2.067	0.001742	3.417						1.726	0	0
GLI-1	11	1317	80	26819	3.929	2.8	0.00179	3.664						3.541	0	0
MITF	16	1317	143	26819	7.022	2.278	0.001805	3.483						2.509	0	0
ESE3	5	1317	19	26819	0.933	5.359	0.001849	4.319						#N/A	#N/A	#N/A
NF-AT4(NFATC3)	8	1317	47	26819	2.308	3.466	0.001884	3.845						3.215	0	0
NANOG	53	1317	714	26819	35.06	1.512	0.001932	3.149						1.825	0	0
KLF8	4	1317	12	26819	0.5893	6.788	0.002086	4.557						#N/A	#N/A	#N/A
HLF	3	1317	6	26819	0.2946	10.18	0.002113	5.112	A_33_P3400578	-0.628066	0.0280498	-1.02822	0.0280498	#N/A	#N/A	#N/A
Rad21	3	1317	6	26819	0.2946	10.18	0.002113	5.112						12.59	0	0
NRF3	3	1317	6	26819	0.2946	10.18	0.002113	5.112						#N/A	#N/A	#N/A
ROR-alpha	11	1317	82	26819	4.027	2.732	0.002189	3.569						#N/A	#N/A	#N/A
TEF-3	10	1317	71	26819	3.487	2.868	0.002376	3.582						2.66	0	0
TFIIA alpha/beta chains	2	1317	2	26819	0.09821	20.36	0.00241	6.223						#N/A	#N/A	#N/A
T-bet	8	1317	49	26819	2.406	3.325	0.002478	3.701						2.698	0	0
PAX3	7	1317	39	26819	1.915	3.655	0.00262	3.771						4.843	0	0
Brca1	5	1317	21	26819	1.031	4.849	0.002982	4.009						#N/A	#N/A	#N/A
DLX5	6	1317	30	26819	1.473	4.073	0.002982	3.827	A_33_P3235147	0.791851	0.000452697	2.69059	0.000452697	#N/A	#N/A	#N/A
FOXP1	7	1317	40	26819	1.964	3.564	0.003043	3.687						2.833	-1.23288	-1.14249
AP-2A	23	1317	255	26819	12.52	1.837	0.003824	3.051						2.296	0	0
Fra-1	11	1317	88	26819	4.321	2.545	0.003834	3.3						4.078	0	0
ARNT	10	1317	76	26819	3.732	2.679	0.003941	3.332						#N/A	#N/A	#N/A
CTCF	16	1317	156	26819	7.661	2.089	0.004337	3.099						2.785	0	0
USF2	15	1317	144	26819	7.071	2.121	0.004883	3.066						#N/A	#N/A	#N/A
NFYA	16	1317	158	26819	7.759	2.062	0.004907	3.043						#N/A	#N/A	#N/A
NELF-A	4	1317	15	26819	0.7366	5.43	0.005112	3.9						#N/A	#N/A	#N/A
TEF-1	9	1317	67	26819	3.29	2.735	0.005313	3.232						2.537	0	0
POU2F3	3	1317	8	26819	0.3929	7.636	0.005493	4.266	A_23_P139028	-2.75965	2.44162e-07	-3.05456	2.44162e-07	#N/A	#N/A	#N/A
HSF1	24	1317	279	26819	13.7	1.752	0.005741	2.868						1.76	0	0
TITF1	11	1317	93	26819	4.567	2.409	0.005853	3.092						#N/A	#N/A	#N/A
Oct-3/4	79	1317	1209	26819	59.37	1.331	0.006013	2.673						1.781	0	0
COUP-TFII	11	1317	94	26819	4.616	2.383	0.006343	3.052						2.411	0	0
Max	11	1317	94	26819	4.616	2.383	0.006343	3.052						#N/A	#N/A	#N/A
TWIST1	13	1317	121	26819	5.942	2.188	0.006542	2.976						2.497	1.29677	1.33354
HMX1	2	1317	3	26819	0.1473	13.58	0.006993	4.95						#N/A	#N/A	#N/A
TFIIE, alpha subunit	2	1317	3	26819	0.1473	13.58	0.006993	4.95						#N/A	#N/A	#N/A
GLIS1	2	1317	3	26819	0.1473	13.58	0.006993	4.95						12.59	0	0
TFIIH p62 subunit	2	1317	3	26819	0.1473	13.58	0.006993	4.95						#N/A	#N/A	#N/A
Pdx-1 (IPF1)	13	1317	122	26819	5.991	2.17	0.007002	2.943						#N/A	#N/A	#N/A
PRDM5	10	1317	83	26819	4.076	2.453	0.007386	3.014						2.958	0	0
p73	15	1317	151	26819	7.415	2.023	0.007524	2.864						2.502	0	0
FOXC2	6	1317	36	26819	1.768	3.394	0.007617	3.266						4.197	0	0
HEY1	7	1317	47	26819	2.308	3.033	0.007627	3.17	A_32_P83845	-1.64079	3.81898e-09	-1.39737	3.81898e-09	4.42	0	0
MTF-1	5	1317	26	26819	1.277	3.916	0.007868	3.381						#N/A	#N/A	#N/A
NFIA	8	1317	59	26819	2.897	2.761	0.007921	3.078	A_23_P85682	1.67541	1.28266e-10	1.6066	1.28266e-10	3.521	0	0
HOXB13	3	1317	9	26819	0.442	6.788	0.00794	3.947						#N/A	#N/A	#N/A
HBP1	3	1317	9	26819	0.442	6.788	0.00794	3.947	A_23_P215787	-1.00321	1.76027e-08	-1.12548	1.76027e-08	#N/A	#N/A	#N/A
MEIS1	9	1317	72	26819	3.536	2.545	0.008512	2.984						#N/A	#N/A	#N/A
GATA-4	16	1317	168	26819	8.25	1.939	0.008743	2.776						2.586	0	0
TCF8	11	1317	99	26819	4.862	2.263	0.009288	2.86						2.671	-1.29856	-0.440561
SOX17	7	1317	49	26819	2.406	2.909	0.009573	3.04						#N/A	#N/A	#N/A
c-Jun/c-Jun	3	1317	10	26819	0.4911	6.109	0.01093	3.672	A_33_P3323298	-1.1281	5.10609e-08	-1.02799	5.10609e-08	#N/A	#N/A	#N/A
IRF3	7	1317	51	26819	2.504	2.795	0.01186	2.916						#N/A	#N/A	#N/A
GATA-5	5	1317	29	26819	1.424	3.511	0.01258	3.075						5.21	0	0
GFI-1	6	1317	40	26819	1.964	3.055	0.01272	2.955						3.777	0	0
RUNX3	7	1317	52	26819	2.554	2.741	0.01314	2.856						2.906	0	0
CREB1	282	1317	5099	26819	250.4	1.126	0.0134	2.276						1.226	0	0
CNBP	2	1317	4	26819	0.1964	10.18	0.01353	4.173						#N/A	#N/A	#N/A
DLX1	2	1317	4	26819	0.1964	10.18	0.01353	4.173						#N/A	#N/A	#N/A
JARID2	2	1317	4	26819	0.1964	10.18	0.01353	4.173						#N/A	#N/A	#N/A
FUBP1	2	1317	4	26819	0.1964	10.18	0.01353	4.173						#N/A	#N/A	#N/A
BARX1	2	1317	4	26819	0.1964	10.18	0.01353	4.173						9.443	0	0
EBF3	2	1317	4	26819	0.1964	10.18	0.01353	4.173						#N/A	#N/A	#N/A

## Sheet: Colo205_Pathway
Enrichment analysis report
Enrichment by Pathway Maps					Colo205 filtered 2 fold ANOVA COMP0UNDS 1 and 3
#	Maps	Total	min(pValue)	Min FDR	p-value	FDR	In Data	Network Objects from Active Data	SW620	Baseline
1	Notch signaling in breast cancer	53	2.27692e-07	0.000181265	2.27692e-07	0.000181265	13	NOTCH4 (ICD4), HEY1, NOTCH4, NOTCH3 (3ICD), Cyclin D1, p21, TFF1, CD44, HES1, c-Myc, NUMB, PLAU (UPA), NOTCH3	#N/A	#N/A
2	Development_Regulation of epithelial-to-mesenchymal transition (EMT)	64	3.60726e-07	0.000181265	3.60726e-07	0.000181265	14	PDGF-A, IL-1 beta, Oncostatin M, HEY1, N-cadherin, NOTCH4, ACTA2, PDGF-R-alpha, Endothelin-1, Fibronectin, Claudin-1, WNT, Frizzled, c-Jun	Oncostatin M, VE-cadherin, N-cadherin, Occludin, TGF-beta 2, ACTA2, PDGF-R-alpha, TWIST1, Endothelin-1, TCF8, WNT, SLUG, Frizzled, Bcl-2, SIP1 (ZFHX1B)	#N/A
3	Development_Hedgehog and PTH signaling pathways in bone and cartilage development	36	1.67684e-06	0.000561741	1.67684e-06	0.000561741	10	PTHR1, COL1A1, Cyclin D1, PKA-reg (cAMP-dependent), COL1A2, c-Fos, PLC-beta, PTCH1, VDR, PKA-cat (cAMP-dependent)	PTHR1, COL1A1, EGR1, PTHrP, COL1A2, PTCH1, VDR, Smoothened	#N/A
4	Canonical WNT signaling pathway in colorectal cancer	66	3.33427e-06	0.000799786	3.33427e-06	0.000799786	13	FZD1, Cyclin D1, CAS-L, p21, Leptin receptor, CD44, FZD10, SFRP2, c-Myc, FZD7, WNT, DACT3, Frizzled	WNT4, FZD1, iNOS, ENC1, CAS-L, CD44, SFRP2, WNT, SLUG, DACT3, TCF7L2 (TCF4), Frizzled, DKK1, WNT6	#N/A
5	Inflammatory mechanisms of pancreatic cancerogenesis	67	3.97904e-06	0.000799786	3.97904e-06	0.000799786	13	IL-1 beta, C/EBP, TNF-R2, c-Jun/c-Fos, CCL20, AP-1, TGF-alpha, GRO-1, c-Fos, ICAM1, IL8RA, PLAU (UPA), c-Jun	IL-32 (NK4), CCL20, GRO-1, NF-kB, iNOS, IL-8, TLR4, SDF-1, CXCR4, Bcl-2	#N/A
6	Role of stellate cells in progression of pancreatic cancer	60	6.73486e-06	0.000979789	6.73486e-06	0.000979789	12	COL1A1, PDGF-A, HB-EGF, GRO-2, ACTA2, COL1A2, PDGF-R-alpha, c-Fos, PDGF receptor, Fibronectin, Collagen I, c-Jun	COL1A1, HB-EGF, GRO-2, ACTA2, COL1A2, SMAD3, CTGF, PDGF-R-alpha, PDGF receptor, IL-8, Collagen I	#N/A
7	IL-1 signaling in melanoma	42	7.71169e-06	0.000979789	7.71169e-06	0.000979789	10	GRO-2, IL-1 beta, c-Jun/c-Fos, AP-1, GRO-1, p21, ICAM1, GRO-3, c-Jun, PD-L1	#N/A	#N/A
8	Blood coagulation_Platelet microparticle generation	71	7.79932e-06	0.000979789	7.79932e-06	0.000979789	13	IL-1 beta, PLA2G7, Filamin A, PKC, Alpha-2A adrenergic receptor, PLC-beta, Fibronectin, MyHC, MYLK1, cPLA2, Coagulation factor V, Collagen I, IP3 receptor	#N/A	#N/A
9	Role of cell adhesion in vaso-occlusion in Sickle cell disease	43	9.67089e-06	0.00107992	9.67089e-06	0.00107992	10	IL-1 beta, PECAM1, PKA-reg (cAMP-dependent), CD45, ICAM1, CD44, Fibronectin, PKA-cat (cAMP-dependent), BCAM, CD36	#N/A	#N/A
10	G protein-coupled receptors signaling in lung cancer	74	1.25014e-05	0.00125639	1.25014e-05	0.00125639	13	HB-EGF, PGE2R4, Galpha(i)-specific peptide GPCRs, Cyclin D1, PKA-reg (cAMP-dependent), Amphiregulin, TGF-alpha, Galpha(q)-specific peptide GPCRs, c-Fos, Endothelin-1, CD44, IL8RA, PKA-cat (cAMP-dependent)	#N/A	#N/A
11	Airway smooth muscle contraction in asthma	56	1.95432e-05	0.00178553	1.95432e-05	0.00178553	11	L-type Ca(II) channel, alpha 1C subunit, GEFT, PKA-reg (cAMP-dependent), Telokin, PLC-beta, MyHC, Adenylate cyclase, PKA-cat (cAMP-dependent), MLCK, MRLC, IP3 receptor	L-type Ca(II) channel, alpha 1C subunit, GEFT, BDKRB2, Telokin, MyHC, MLCK, MRLC, IP3 receptor, ACM3	#N/A
12	Transcription_Role of AP-1 in regulation of cellular metabolism	38	2.31614e-05	0.00193977	2.31614e-05	0.00193977	9	c-Jun/c-Fos, Cyclin D1, AP-1, FasL(TNFSF6), Alpha1-globin, ITGA2, c-Fos, p21, c-Jun	#N/A	#N/A
13	Mechanisms of drug resistance in multiple myeloma	49	3.29469e-05	0.00254705	3.29469e-05	0.00254705	10	Cyclin D1, HAS1, p21, CD44, WNT3A, IL8RA, HES1, c-Myc, Frizzled, MDR1	CD44, GCR-alpha, WNT3A, HES1, IL-8, TCF7L2 (TCF4), Frizzled, Bcl-2, MDR1	#N/A
14	Immune response_C5a signaling	50	3.96392e-05	0.00259513	3.96392e-05	0.00259513	10	C5aR, IL-1 beta, Oncostatin M, c-Jun/c-Fos, AP-1, PKC, p67-phox, c-Fos, PLC-beta, c-Jun	#N/A	#N/A
15	Development_VEGF-family signaling	41	4.44232e-05	0.00259513	4.44232e-05	0.00259513	9	Neuropilin-2, VEGFR-1, c-Jun/c-Fos, c-Fos, PLGF, Fibronectin, PLC-gamma, c-Jun, IP3 receptor	#N/A	#N/A
16	Muscle contraction_GPCRs in the regulation of smooth muscle tone	83	4.45487e-05	0.00259513	4.45487e-05	0.00259513	13	L-type Ca(II) channel, alpha 1C subunit, GEFT, MaxiK alpha subunit, PKA-reg (cAMP-dependent), Telokin, PLC-beta, Endothelin-1, MyHC, Adenylate cyclase, PKA-cat (cAMP-dependent), MLCK, MRLC, IP3 receptor	#N/A	#N/A
17	Transcription_Role of VDR in regulation of genes involved in osteoporosis	61	4.52727e-05	0.00259513	4.52727e-05	0.00259513	11	PTHR1, COL1A1, IL-1 beta, c-Jun/c-Fos, FasL(TNFSF6), Osteoprotegerin, c-Fos, VDR, PKA-cat (cAMP-dependent), c-Jun, CALB1	#N/A	#N/A
18	Reproduction_GnRH signaling	72	4.64799e-05	0.00259513	4.64799e-05	0.00259513	12	CaMK I, L-type Ca(II) channel, alpha 1C subunit, c-Jun/c-Fos, PKA-reg (cAMP-dependent), AP-1, c-Fos, PLC-beta, Adenylate cyclase, PKA-cat (cAMP-dependent), MEK6(MAP2K6), c-Jun, IP3 receptor	#N/A	#N/A
19	Immune response_ETV3 affect on CSF1-promoted macrophage differentiation	33	5.54271e-05	0.00284197	5.54271e-05	0.00284197	8	c-Jun/c-Fos, AP-1, CSF1, c-Fos, MSR1, c-Myc, PLAU (UPA), c-Jun	#N/A	#N/A
20	Cell adhesion_ECM remodeling	52	5.65566e-05	0.00284197	5.65566e-05	0.00284197	10	HB-EGF, Collagen II, CD44, TIMP2, IL8RA, Fibronectin, Nidogen, PLAU (UPA), Collagen I, Versican	HB-EGF, PLAUR (uPAR), Collagen IV, CD44, Kallikrein 1, IL-8, IGF-2, Collagen I, Versican	Laminin 5, CD44, SERPINE2, MMP-1, IL-8, EGFR, Laminin 1, Versican, IBP4, IL8RA, Nidogen, PLAU (UPA), Kallikrein 3 (PSA), Vitronectin, PLAT (TPA), MSN (moesin), MMP-15, MMP-14, PLAUR (uPAR), Collagen II, Collagen IV, TIMP2, IGF-1, Kallikrein 1, PAI1
21	Immune response_T regulatory cell-mediated modulation of effector T cell and NK cell functions	53	6.70979e-05	0.00317818	6.70979e-05	0.00317818	10	PGE2R4, PKA-reg (cAMP-dependent), FasL(TNFSF6), STAT4, MIP-1-alpha, KLRK1 (NKG2D), HES1, Granzyme A, PKA-cat (cAMP-dependent), Connexin 43	#N/A	#N/A
22	Cytoskeleton remodeling_TGF, WNT and cytoskeletal remodeling	111	6.95721e-05	0.00317818	6.95721e-05	0.00317818	15	Cyclin D1, RHEB2, Caveolin-1, p21, Fibronectin, MYLK1, c-Myc, WNT, Actin, PLAU (UPA), MLCK, MRLC, Frizzled, Paxillin, c-Jun	#N/A	#N/A
23	Nociception_Nociceptin receptor signaling	76	8.04222e-05	0.0035141	8.04222e-05	0.0035141	12	Prepronociceptin, PKA-reg (cAMP-dependent), PKC, c-Fos, PLC-beta, cPLA2, Actin, Adenylate cyclase, PKA-cat (cAMP-dependent), c-Jun, IP3 receptor, Nociceptin	#N/A	#N/A
24	Role of osteoblasts in bone lesions formation in multiple myeloma	35	8.7166e-05	0.00365008	8.7166e-05	0.00365008	8	FasL(TNFSF6), Osteoprotegerin, WNT3A, MIP-1-alpha, SFRP2, WNT, Frizzled, Collagen I	Apo-2L(TNFSF10), Osteoprotegerin, WNT3A, SFRP2, WNT, BMP2, Frizzled, Collagen I, FasR(CD95), DKK1	#N/A
25	Role of activation of WNT signaling in the progression of lung cancer	77	9.16631e-05	0.00368486	9.16631e-05	0.00368486	12	FZD1, Cyclin D1, p21, WNT3A, DKK3, NKD1, SFRP2, c-Myc, FZD7, WNT, Frizzled, NOTCH3	WNT4, FZD1, Sirtuin1, iNOS, WNT3A, DKK3, Tcf(Lef), SFRP2, WNT, TCF7L2 (TCF4), Frizzled, DKK1	WNT4, E-cadherin, iNOS, RUNX3, FZD6, NKD1, Tcf(Lef), Krm1, Porcn, Lef-1, DKK1, WNT3, FZD3, p21, Dsh, JNK1(MAPK8), SFRP5, Sirtuin1, Survivin, WNT, FZD5, LRP6, FZD1, Cyclin D1, FZD9, HOXB9, c-Myc, FZD7, DVL-2, p38 MAPK, Axin, CD147, Frizzled, NOTCH3
26	Beta-catenin-dependent transcription regulation in colorectal cancer	36	0.000107947	0.00401803	0.000107947	0.00401803	8	c-Jun/c-Fos, Cyclin D1, CD44, Claudin-1, CD44 soluble, PLAU (UPA), MDR1, CD44 (EXT)	PLAUR (uPAR), CD44, Progastrin, IL-8, NRCAM, CD44 soluble, TCF7L2 (TCF4), MDR1, L1CAM, CD44 (EXT)	#N/A
27	WNT signaling in gastric cancer	36	0.000107947	0.00401803	0.000107947	0.00401803	8	Cyclin D1, CD44, WNT3A, DKK3, SFRP2, WNT, WNT 8A, Frizzled	CD44, WNT3A, DKK3, Tcf(Lef), WNT7A, SFRP2, WNT, TCF7L2 (TCF4), Frizzled	#N/A
28	Immune response_MIF - the neuroendocrine-macrophage connector	46	0.000115594	0.004149	0.000115594	0.004149	9	MHC class II, PKA-reg (cAMP-dependent), ABCA1, PKC, PLC-beta, PLA2, cPLA2, PKA-cat (cAMP-dependent), IP3 receptor	#N/A	#N/A
29	IL-6 signaling in colorectal cancer	37	0.000132661	0.00455447	0.000132661	0.00455447	8	TNF-R2, Cyclin D1, Cyclin B, ICAM1, sIL6-RA, HSP70, c-Myc, IL6RA	#N/A	#N/A
30	Mucin expression in CF airways	69	0.000145259	0.00455447	0.000145259	0.00455447	11	IL-1 beta, PGE2R4, CFTR, c-Jun/c-Fos, TGF-alpha, PKC-theta, PLC-beta, PKA-cat (cAMP-dependent), MEK6(MAP2K6), c-Jun, IP3 receptor	#N/A	#N/A
31	Development_Regulation of cytoskeleton proteins in oligodendrocyte differentiation and myelination	58	0.000148378	0.00455447	0.000148378	0.00455447	10	PDGF-A, Tau (MAPT), MAP6, MAP-1B, NCAM1, PDGF-R-alpha, MAP2, MRLC, Paxillin, TPPP (p24)	Tubulin beta, Tubulin alpha, MAP-1B, NCAM1, MAP4, PDGF-R-alpha, Gelsolin, MAP2, MRLC, L1CAM, Tubulin (in microtubules)	#N/A
32	WNT signaling in proliferative-type melanoma cells	38	0.000161861	0.00455447	0.000161861	0.00455447	8	TAJ(TNFRSF19), Cyclin D1, WNT3A, DKK3, Fibronectin, c-Myc, WNT, Frizzled	WNT7B, WNT3A, DKK3, WNT, NRCAM, Frizzled, DKK1, DACT1	#N/A
33	Immune response_Human NKG2D signaling	38	0.000161861	0.00455447	0.000161861	0.00455447	8	c-Jun/c-Fos, AP-1, c-Fos, KLRK1 (NKG2D), ULBP1, PLC-gamma 2, c-Jun, IP3 receptor	#N/A	#N/A
34	Cell adhesion_Cell-matrix glycoconjugates	38	0.000161861	0.00455447	0.000161861	0.00455447	8	CEACAM5, BCAN, NCAM1, ITIH3, CD44, TIMP2, Aggrecan, Versican	#N/A	#N/A
35	Role of Endothelin-1 in inflammation and vasoconstriction in Sickle cell disease	38	0.000161861	0.00455447	0.000161861	0.00455447	8	VEGFR-1, c-Jun/c-Fos, AP-1, c-Fos, Endothelin-1, PLGF, SK4/IK1, c-Jun	#N/A	#N/A
36	Cell adhesion_Integrin-mediated cell adhesion and migration	48	0.000163145	0.00455447	0.000163145	0.00455447	9	Collagen II, RASGRF1, Fibronectin, MyHC, MYLK1, MLCK, MRLC, Collagen I, Paxillin	#N/A	#N/A
37	Immune response_IL-18 signaling	60	0.000198663	0.00539611	0.000198663	0.00539611	10	IL-1 beta, c-Jun/c-Fos, AP-1, FasL(TNFSF6), p67-phox, c-Fos, ICAM1, Fibronectin, MEK6(MAP2K6), c-Jun	#N/A	#N/A
38	VEGF signaling in multiple myeloma	50	0.000225981	0.00578941	0.000225981	0.00578941	9	VEGFR-1, Caveolin-1, ICAM1, FKHR, Fibronectin, c-Myc, PLC-gamma, MDR1, IP3 receptor	#N/A	#N/A
39	WNT signaling in HCC	40	0.000236185	0.00578941	0.000236185	0.00578941	8	Cyclin D1, WNT3A, SFRP2, c-Myc, FZD7, WNT, GLNA, Frizzled	WNT4, LGR5, WNT7B, WNT3A, Tcf(Lef), SFRP2, WNT, TCF7L2 (TCF4), Frizzled, DKK1, DACT1	#N/A
40	Development_Role of Activin A in cell differentiation and proliferation	40	0.000236185	0.00578941	0.000236185	0.00578941	8	PKA-reg (cAMP-dependent), p21, Activin A, VDR, Lefty-1, c-Myc, Adenylate cyclase, PKA-cat (cAMP-dependent)	#N/A	#N/A
41	The role of UV radiation in melanoma development	40	0.000236185	0.00578941	0.000236185	0.00578941	8	HB-EGF, XPG, Amphiregulin, TGF-alpha, FasL(TNFSF6), p21, MEK6(MAP2K6), c-Jun	#N/A	#N/A
42	Influence of bone marrow cell environment on progression of multiple myeloma	52	0.000307704	0.00724654	0.000307704	0.00724654	9	IL-1 beta, VEGFR-1, HAS1, PTCH1, CD44, Fibronectin, PLC-gamma, Collagen I, IP3 receptor	#N/A	#N/A
43	Cell adhesion_Chemokines and adhesion	100	0.000310051	0.00724654	0.000310051	0.00724654	13	GRO-1, Filamin A, Caveolin-1, CD44, Caveolin-2, IL8RA, Fibronectin, c-Myc, Actin, PLAU (UPA), Collagen I, Paxillin, c-Jun	#N/A	#N/A
44	Stromal-epithelial interaction in Prostate Cancer	42	0.000336376	0.00751239	0.000336376	0.00751239	8	PDGF-A, ACTA2, PDGF-R-alpha, TIMP2, Fibronectin, Collagen I, c-Jun, Versican	#N/A	#N/A
45	Immune response_Murine NKG2D signaling	42	0.000336376	0.00751239	0.000336376	0.00751239	8	c-Jun/c-Fos, AP-1, c-Fos, KLRK1 (NKG2D), ULBP1, PLC-gamma 2, c-Jun, IP3 receptor	#N/A	#N/A
46	Cytoskeleton remodeling_Cytoskeleton remodeling	102	0.000377505	0.00798397	0.000377505	0.00798397	13	Filamin A, Caveolin-1, p21, Fibronectin, MyHC, MYLK1, c-Myc, PLAU (UPA), MLCK, MRLC, Collagen I, Paxillin, c-Jun	#N/A	#N/A
47	G-protein signaling_Regulation of CDC42 activity	33	0.000397213	0.00798397	0.000397213	0.00798397	7	LyGDI, DBS, DOCK11, RhoGDI gamma, Caspase-1, B-chimaerin, ASEF2	#N/A	#N/A
48	Role of metalloproteases and heparanase in progression of pancreatic cancer	33	0.000397213	0.00798397	0.000397213	0.00798397	7	HB-EGF, FasL(TNFSF6), MMP-11 (Str-3), CD44, TIMP2, CD44 soluble, CD44 (EXT)	#N/A	#N/A
49	Cytoskeleton remodeling_Thyroliberin in cytoskeleton remodeling	33	0.000397213	0.00798397	0.000397213	0.00798397	7	L-type Ca(II) channel, alpha 1C subunit, PKA-reg (cAMP-dependent), Tau (MAPT), Adenylate cyclase, PKA-cat (cAMP-dependent), PLC-beta1, IP3 receptor	#N/A	#N/A
50	Chemotaxis_CCL19- and CCl21-mediated chemotaxis	33	0.000397213	0.00798397	0.000397213	0.00798397	7	PGE2R4, PKA-reg (cAMP-dependent), c-Fos, PLC-gamma 2, Adenylate cyclase, PKA-cat (cAMP-dependent), IP3 receptor	#N/A	#N/A

## Sheet: CDK8_SE_Transcription factor
Transcription Factors										CDK8 Super-enhancer genes HCT-116_genelist
Network Object Name	Actual	n	R	N	Expected	Ratio	p-value	z-score	Input IDs	Signal	p-value
BTG2	2	352	2	26819	0.02625	76.19	0.0001718	12.26
TCEAL7	1	352	1	26819	0.01313	76.19	0.01313	8.671
KLP1	1	352	1	26819	0.01313	76.19	0.01313	8.671
XPD	1	352	1	26819	0.01313	76.19	0.01313	8.671
BAF60c	1	352	1	26819	0.01313	76.19	0.01313	8.671
MAD4	1	352	1	26819	0.01313	76.19	0.01313	8.671
NPAS3	1	352	1	26819	0.01313	76.19	0.01313	8.671
STRA13	1	352	1	26819	0.01313	76.19	0.01313	8.671
BRM	1	352	1	26819	0.01313	76.19	0.01313	8.671
MAT1	1	352	1	26819	0.01313	76.19	0.01313	8.671
TERT	1	352	1	26819	0.01313	76.19	0.01313	8.671
ZNF238	4	352	8	26819	0.105	38.1	1.959e-06	12.1
OVOL1	2	352	4	26819	0.0525	38.1	0.001013	8.556
ERF	2	352	5	26819	0.06563	30.48	0.001673	7.602
ASH2L	3	352	9	26819	0.1181	25.4	0.0001776	8.442
UBF	2	352	6	26819	0.07875	25.4	0.002488	6.892
HOXB9	2	352	7	26819	0.09188	21.77	0.003454	6.338
BOB1	3	352	11	26819	0.1444	20.78	0.0003421	7.567
Elk-3	4	352	16	26819	0.21	19.05	4.687e-05	8.328
DMTF1	2	352	8	26819	0.105	19.05	0.004565	5.888
SOX1	2	352	9	26819	0.1181	16.93	0.005818	5.513
TLX3	2	352	9	26819	0.1181	16.93	0.005818	5.513
HBP1	2	352	9	26819	0.1181	16.93	0.005818	5.513
MSX1	5	352	25	26819	0.3281	15.24	1.621e-05	8.214
SOX6	5	352	25	26819	0.3281	15.24	1.621e-05	8.214
DEC2	3	352	15	26819	0.1969	15.24	0.0009072	6.361
PAX4	2	352	10	26819	0.1313	15.24	0.00721	5.193
SIP1 (ZFHX1B)	4	352	23	26819	0.3019	13.25	0.0002121	6.778
NOTCH1 precursor	2	352	12	26819	0.1575	12.7	0.01039	4.674
KLF8	2	352	12	26819	0.1575	12.7	0.01039	4.674
Bcl-3	2	352	12	26819	0.1575	12.7	0.01039	4.674
YAP1 (YAp65)	2	352	13	26819	0.1706	11.72	0.01218	4.459
NF-kB2 (p100)	2	352	13	26819	0.1706	11.72	0.01218	4.459
LXR-beta	6	352	40	26819	0.525	11.43	1.29e-05	7.612
ZNF145	6	352	40	26819	0.525	11.43	1.29e-05	7.612
MCR	3	352	20	26819	0.2625	11.43	0.002165	5.38
ITF2	4	352	27	26819	0.3544	11.29	0.0004033	6.168
LYL1	2	352	14	26819	0.1838	10.88	0.01408	4.266
LMO2	2	352	14	26819	0.1838	10.88	0.01408	4.266
GCNF	2	352	14	26819	0.1838	10.88	0.01408	4.266
ChREBP	10	352	71	26819	0.9319	10.73	3.032e-08	9.468
HEY2	3	352	22	26819	0.2888	10.39	0.002869	5.081
SOX3	4	352	30	26819	0.3938	10.16	0.0006105	5.788
JDP2	2	352	15	26819	0.1969	10.16	0.01611	4.092
SIX1	4	352	31	26819	0.4069	9.831	0.0006937	5.674
DEC1 (Stra13)	9	352	71	26819	0.9319	9.658	3.799e-07	8.424	BHLHE40	1	0
GFI1B	3	352	24	26819	0.315	9.524	0.003698	4.818
GCR-beta	3	352	24	26819	0.315	9.524	0.003698	4.818
Neurogenin 2	2	352	17	26819	0.2231	8.964	0.02051	3.788
CIC	2	352	17	26819	0.2231	8.964	0.02051	3.788
THAP11	4	352	35	26819	0.4594	8.707	0.001108	5.262
ATH1	8	352	74	26819	0.9713	8.237	5.769e-06	7.189
Elk-4	3	352	28	26819	0.3675	8.163	0.005758	4.373
SMAD9 (SMAD8)	3	352	28	26819	0.3675	8.163	0.005758	4.373
E2F5	3	352	29	26819	0.3806	7.882	0.006361	4.276
STAT5B	7	352	68	26819	0.8925	7.843	3.083e-05	6.516
ATF-3	14	352	139	26819	1.824	7.674	4.646e-09	9.098
TAF1	3	352	30	26819	0.3938	7.619	0.007	4.183
EKLF1	6	352	61	26819	0.8006	7.494	0.0001481	5.856
CTIP2	3	352	31	26819	0.4069	7.373	0.007676	4.095
Oct-2	4	352	42	26819	0.5513	7.256	0.002204	4.679
PXR	4	352	42	26819	0.5513	7.256	0.002204	4.679
STAT5A	10	352	107	26819	1.404	7.121	1.52e-06	7.316
SP2	4	352	43	26819	0.5644	7.087	0.002405	4.607
PPAR-beta(delta)	11	352	119	26819	1.562	7.043	5.08e-07	7.619
KLF11 (TIEG2)	3	352	33	26819	0.4331	6.926	0.009139	3.928
TBP	10	352	115	26819	1.509	6.625	2.938e-06	6.972
ROR-alpha	7	352	82	26819	1.076	6.504	0.0001033	5.757
C/EBP zeta	8	352	94	26819	1.234	6.484	3.395e-05	6.143
FoxL2	5	352	59	26819	0.7744	6.457	0.00106	4.839
RXRA	14	352	177	26819	2.323	6.026	1.015e-07	7.737
ETS2	10	352	127	26819	1.667	5.999	7.175e-06	6.512
CLOCK	6	352	78	26819	1.024	5.861	0.0005686	4.958
PAX3	3	352	39	26819	0.5119	5.861	0.01445	3.503
CUX1	3	352	39	26819	0.5119	5.861	0.01445	3.503
TFIIB	6	352	79	26819	1.037	5.787	0.0006086	4.914
ATF-1	5	352	66	26819	0.8663	5.772	0.001757	4.476
TITF1	7	352	93	26819	1.221	5.735	0.0002277	5.275
GFI-1	3	352	40	26819	0.525	5.714	0.01547	3.441
SOX4	8	352	109	26819	1.431	5.592	9.774e-05	5.54
NF-kB2 (p52)	8	352	109	26819	1.431	5.592	9.774e-05	5.54
RFX6	3	352	41	26819	0.5381	5.575	0.01654	3.381
KLF2	3	352	41	26819	0.5381	5.575	0.01654	3.381
FOXO3A	14	352	193	26819	2.533	5.527	2.954e-07	7.279
FOXK1	5	352	70	26819	0.9188	5.442	0.00228	4.292
TCF7 (TCF1)	3	352	42	26819	0.5513	5.442	0.01764	3.323
NF-kB p50/p50	5	352	71	26819	0.9319	5.366	0.002427	4.248
WT1	12	352	171	26819	2.244	5.347	2.948e-06	6.576
BMAL1	8	352	114	26819	1.496	5.347	0.0001338	5.363
FosB	4	352	58	26819	0.7613	5.255	0.007091	3.741
TCF12	3	352	44	26819	0.5775	5.195	0.01997	3.211
GATA-6	8	352	119	26819	1.562	5.122	0.0001802	5.197
TCF7L1 (TCF3)	5	352	77	26819	1.011	4.947	0.003456	4
EBF	8	352	124	26819	1.628	4.916	0.000239	5.04
SF1	4	352	63	26819	0.8269	4.837	0.009462	3.517
Fra-2	5	352	79	26819	1.037	4.822	0.003859	3.924
LXR-alpha	6	352	95	26819	1.247	4.812	0.001598	4.292
SMAD2	9	352	143	26819	1.877	4.795	0.000119	5.248
TR-alpha	6	352	96	26819	1.26	4.762	0.001686	4.258
E4BP4	4	352	64	26819	0.84	4.762	0.009991	3.475
EPAS1	11	352	179	26819	2.349	4.682	2.654e-05	5.7
c-Fos	21	352	342	26819	4.489	4.678	6.277e-09	7.895
NF-kB1 (p105)	4	352	66	26819	0.8663	4.618	0.0111	3.393
PRDM5	5	352	83	26819	1.089	4.59	0.004766	3.777
XBP1	9	352	150	26819	1.969	4.571	0.000171	5.058
Ikaros	4	352	67	26819	0.8794	4.549	0.01169	3.354
Bcl-6	9	352	151	26819	1.982	4.541	0.0001798	5.032
NK31	4	352	68	26819	0.8925	4.482	0.0123	3.315
OTX2	4	352	69	26819	0.9056	4.417	0.01292	3.277
Evi-1	5	352	87	26819	1.142	4.379	0.005814	3.64
PR (nuclear)	15	352	263	26819	3.452	4.345	2.365e-06	6.288
PAX5	8	352	141	26819	1.851	4.323	0.0005673	4.562
RARalpha	8	352	141	26819	1.851	4.323	0.0005673	4.562
c-Rel (NF-kB subunit)	12	352	212	26819	2.783	4.313	2.603e-05	5.584
SREBP1 (nuclear)	8	352	142	26819	1.864	4.292	0.0005944	4.537	SREBF1	1	0
C/EBPdelta	9	352	160	26819	2.1	4.286	0.000277	4.807
EGR2 (Krox20)	6	352	107	26819	1.404	4.272	0.002916	3.911
ATF-4	8	352	144	26819	1.89	4.233	0.0006518	4.486
HIF1A	36	352	650	26819	8.531	4.22	4.152e-13	9.583
PAX6	7	352	128	26819	1.68	4.167	0.00154	4.141
Lef-1	8	352	147	26819	1.929	4.146	0.0007462	4.411
YB-1	7	352	130	26819	1.706	4.103	0.001683	4.089
C/EBPalpha	20	352	374	26819	4.909	4.074	1.402e-07	6.905
MYOD	9	352	169	26819	2.218	4.057	0.0004143	4.598
COUP-TFII	5	352	94	26819	1.234	4.053	0.008022	3.419
Max	5	352	94	26819	1.234	4.053	0.008022	3.419
E2A	6	352	113	26819	1.483	4.046	0.003819	3.741
p73	8	352	151	26819	1.982	4.037	0.0008889	4.315
ARNT	4	352	76	26819	0.9975	4.01	0.01786	3.03
HNF3-beta	15	352	288	26819	3.78	3.968	7.127e-06	5.841
EGR1	23	352	442	26819	5.801	3.965	2.639e-08	7.248
KLF4	16	352	310	26819	4.069	3.932	3.97e-06	5.989
RelA (p65 NF-kB subunit)	44	352	865	26819	11.35	3.876	1.701e-14	9.914
HNF3-alpha	11	352	217	26819	2.848	3.862	0.0001501	4.882
NFYA	8	352	158	26819	2.074	3.858	0.001191	4.155
p53	60	352	1209	26819	15.87	3.781	4.831e-19	11.41
C/EBPbeta	30	352	609	26819	7.993	3.753	6.861e-10	7.926
ESR2	7	352	143	26819	1.877	3.73	0.002883	3.774
FOXM1	6	352	123	26819	1.614	3.717	0.005764	3.482
GCR-alpha	56	352	1150	26819	15.09	3.71	1.994e-17	10.83
FKHR	13	352	268	26819	3.518	3.696	6.024e-05	5.115
SMAD3	12	352	253	26819	3.321	3.614	0.000142	4.817
VDR	11	352	232	26819	3.045	3.612	0.0002678	4.609
CDX2	6	352	127	26819	1.667	3.6	0.006715	3.386
AHR	12	352	257	26819	3.373	3.558	0.0001643	4.751
SOX9	7	352	150	26819	1.969	3.556	0.003756	3.62
p63	20	352	429	26819	5.631	3.552	1.214e-06	6.145
JunD	9	352	194	26819	2.546	3.535	0.00111	4.086	JUND	1	0
JunB	6	352	130	26819	1.706	3.516	0.007499	3.317	JUNB	1	0
PPAR-gamma	14	352	305	26819	4.003	3.497	5.742e-05	5.058
SMAD1	6	352	131	26819	1.719	3.49	0.007775	3.294
RelB (NF-kB subunit)	9	352	197	26819	2.586	3.481	0.001236	4.03
ESR1 (nuclear)	57	352	1249	26819	16.39	3.477	1.796e-16	10.34
SP3	23	352	511	26819	6.707	3.429	3.539e-07	6.394
GATA-2	9	352	201	26819	2.638	3.412	0.00142	3.958
SMAD4	10	352	224	26819	2.94	3.401	0.0008031	4.162
ETS1	17	352	383	26819	5.027	3.382	1.451e-05	5.414
c-Jun	35	352	795	26819	10.43	3.354	4.955e-10	7.771
TCF7L2 (TCF4)	16	352	371	26819	4.869	3.286	3.654e-05	5.113	TCF7L2	1	0
c-Myb	7	352	168	26819	2.205	3.175	0.006915	3.261
STAT1	14	352	340	26819	4.463	3.137	0.00018	4.574
Androgen receptor	40	352	973	26819	12.77	3.132	2.005e-10	7.813
SP1	64	352	1593	26819	20.91	3.061	9.029e-16	9.781
STAT3	25	352	623	26819	8.177	3.057	9.099e-07	5.992
TR-beta1	6	352	151	26819	1.982	3.027	0.01494	2.881
Oct-3/4	48	352	1209	26819	15.87	3.025	8.636e-12	8.309
SRF	16	352	405	26819	5.316	3.01	0.0001024	4.7
NF-kB1 (p50)	18	352	457	26819	5.998	3.001	3.974e-05	4.975
PPAR-alpha	7	352	185	26819	2.428	2.883	0.0114	2.964	PPARA	1	0
Elk-1	6	352	160	26819	2.1	2.857	0.0193	2.717
E2F1	30	352	804	26819	10.55	2.843	3.379e-07	6.119
c-Myc	91	352	2475	26819	32.48	2.801	5.21e-20	10.85	MYC	1	0
E2F4	12	352	331	26819	4.344	2.762	0.00154	3.72
SOX2	21	352	588	26819	7.718	2.721	3.858e-05	4.866
USF1	8	352	224	26819	2.94	2.721	0.009808	2.983
HNF4-alpha	18	352	510	26819	6.694	2.689	0.0001586	4.441
AP-2A	9	352	255	26819	3.347	2.689	0.00683	3.125
STAT6	8	352	232	26819	3.045	2.627	0.01194	2.871	STAT6	1	0
TAL1	7	352	204	26819	2.678	2.614	0.01857	2.669
PU.1	13	352	390	26819	5.119	2.54	0.002097	3.532
NANOG	23	352	714	26819	9.371	2.454	8.04e-05	4.542
IRF8	8	352	251	26819	3.294	2.428	0.01833	2.622
NRSF	12	352	444	26819	5.828	2.059	0.01502	2.595
CREB1	136	352	5099	26819	66.92	2.032	5.399e-18	9.445
YY1	26	352	1120	26819	14.7	1.769	0.003764	3.031

## Sheet: CDK8_SE_Toxicity Networks
Enrichment analysis report
Enrichment by Toxicity Networks					CDK8 Super-enhancer genes HCT-116_genelist
#	Networks	Total	pValue	Min FDR	p-value	FDR	In Data	Network Objects from Active Data
1	Inflammation_TGF-beta signaling	49	4.40407e-05	0.00942733	4.40407e-05	0.00942733	8	p38 MAPK, GSK3 alpha/beta, JunB, PPAR-alpha, p38beta (MAPK11), PP2A regulatory, Cyclin D, Cyclin D1
2	Metabolism_RXR-alpha regulation of lipid metabolism	66	6.34837e-05	0.00942733	6.34837e-05	0.00942733	9	p38 MAPK, PKA-cat (cAMP-dependent), SREBP1 precursor, FASN, CYP24A1, PPAR-alpha, IRS-1, c-Myc, CYP4F2
3	Cell cycle_EGFR signaling	59	0.000172482	0.0106193	0.000172482	0.0106193	8	p38 MAPK, GSK3 alpha/beta, Amphiregulin, p38beta (MAPK11), IRS-1, Betacellulin, c-Myc, Epiregulin
4	Cell adhesion_Integrins signaling to Beta-catenin	60	0.000194543	0.0106193	0.000194543	0.0106193	8	GSK3 alpha/beta, TCF7L2 (TCF4), Tcf(Lef), c-Myc, Actin cytoskeletal, WNT, Cyclin D1, Actin
5	Cell adhesion_Vitronectin signaling	60	0.000194543	0.0106193	0.000194543	0.0106193	8	p38 MAPK, GSK3 alpha/beta, TCF7L2 (TCF4), p38beta (MAPK11), Tcf(Lef), c-Myc, Cyclin D1, Actin
6	Cell cycle_TGF-beta 1, TGF-beta 2 signaling	46	0.000214531	0.0106193	0.000214531	0.0106193	7	p38 MAPK, GSK3 alpha/beta, JunB, p38beta (MAPK11), PP2A regulatory, Cyclin D, Cyclin D1
7	Apoptosis_Negative regulation_IGF-receptor signaling	64	0.000307291	0.0130379	0.000307291	0.0130379	8	GSK3 alpha/beta, Bcl-XL, MNK2(GPRK7), Laforin, IRS-1, c-Myc, Cyclin D, Cyclin D1
8	Signal transduction_Wnt receptor signaling pathway	15	0.000582838	0.0216379	0.000582838	0.0216379	4	GSK3 alpha/beta, TCF7L2 (TCF4), Tcf(Lef), WNT
9	Cell cycle_TGF-beta signaling to SMAD3	27	0.000710969	0.023462	0.000710969	0.023462	5	GSK3 alpha/beta, JunB, PP2A regulatory, Cyclin D, Cyclin D1
10	Cell adhesion_PAI1 signaling	60	0.00112914	0.0304868	0.00112914	0.0304868	7	p38 MAPK, GSK3 alpha/beta, TCF7L2 (TCF4), p38beta (MAPK11), Tcf(Lef), Cyclin D1, Actin
11	Cell cycle_APC regulation	60	0.00112914	0.0304868	0.00112914	0.0304868	7	p38 MAPK, Lamin B, Ubiquitin, PKA-cat (cAMP-dependent), CDC25B, c-Myc, GADD45 beta
12	Cell cycle_Cyclin D	62	0.0013746	0.0340214	0.0013746	0.0340214	7	GSK3 alpha/beta, Ubiquitin, TCF7L2 (TCF4), Tcf(Lef), c-Myc, Cyclin D, Cyclin D1
13	Cell cycle_TGF-beta signaling, CDK6	32	0.00159013	0.0363283	0.00159013	0.0363283	5	GSK3 alpha/beta, JunB, PP2A regulatory, Cyclin D, Cyclin D1
14	Cell adhesion_Actin cytoskeleton	49	0.00200069	0.0424431	0.00200069	0.0424431	6	CAPZA, TARA, FAT1, Actin cytoskeletal, VIL2 (ezrin), Actin
15	Signal transduction_Ribosomal protein S6 kinase, 70kDa, polypeptide 1	68	0.00236789	0.0468842	0.00236789	0.0468842	7	GSK3 alpha/beta, Bcl-XL, HGF receptor (Met), IRS-1, PP2A regulatory, Cyclin D, Cyclin D1
16	Cell adhesion_PAI1 signaling, PPAR-beta (delta), RXR-alpha regulation	56	0.00397783	0.0738385	0.00397783	0.0738385	6	GSK3 alpha/beta, TCF7L2 (TCF4), IRS-1, Tcf(Lef), WNT, Caveolin-1
17	Cell cycle_CDC25C regulation	40	0.00436601	0.0762768	0.00436601	0.0762768	5	p38 MAPK, Lamin B, CDC25B, c-Myc, Histone H1
18	Signal transduction_Janus kinase 2 (protein tyrosine kinase)	60	0.00561428	0.0875423	0.00561428	0.0875423	6	GSK3 alpha/beta, Bcl-XL, SOCS3, c-Myc, CCL13, Cyclin D1
19	Signal transduction_STAT6	27	0.00581523	0.0875423	0.00581523	0.0875423	4	Bcl-XL, STAT6, LIF, LIFR
20	Cell adhesion_Collagen III_Actin	14	0.0058951	0.0875423	0.0058951	0.0875423	3	Actin cytoskeletal, VIL2 (ezrin), Actin
21	Apoptosis_p53, p73 regulation	44	0.00660731	0.0934463	0.00660731	0.0934463	5	Adenylate cyclase, PKA-cat (cAMP-dependent), Actin cytoskeletal, GADD45 beta, Actin
22	Development_Skeletal development-Osteopontin signaling	30	0.00852613	0.115103	0.00852613	0.115103	4	PKA-cat (cAMP-dependent), Actin cytoskeletal, VIL2 (ezrin), Actin
23	Blood coagulation_Fibrinogen signaling	31	0.00958611	0.123786	0.00958611	0.123786	4	HABP2, Actin cytoskeletal, VIL2 (ezrin), Actin
24	Inflammation_IL-10 signaling	32	0.0107284	0.132764	0.0107284	0.132764	4	Bcl-XL, SOCS3, c-Myc, Cyclin D1
25	Protein folding_ATFs regulation	70	0.011794	0.140112	0.011794	0.140112	6	BRD2, Galpha(q)-specific peptide GPCRs, P4HB, Galpha(i)-specific peptide GPCRs, IRE1, GPR66
26	Cell cycle_TGF signaling to CDK4	53	0.0143749	0.164205	0.0143749	0.164205	5	GSK3 alpha/beta, JunB, PP2A regulatory, Cyclin D, Cyclin D1
27	Cell cycle_AP-2A, FOXM1, c-Myc, USF1 regulation	20	0.0163839	0.180223	0.0163839	0.180223	3	Lamin B, c-Myc, Histone H1
28	Proliferation_Thrombopoietin signaling	56	0.0179379	0.184448	0.0179379	0.184448	5	GSK3 alpha/beta, Bcl-XL, SOCS3, c-Myc, Cyclin D1
29	Chemotaxis_MAPK cascades	122	0.0180101	0.184448	0.0180101	0.184448	8	p38 MAPK, Ubiquitin, HMGI/Y, SOCS3, p38beta (MAPK11), UBC, c-Myc, CCL13
30	Cell adhesion_Cytoskeleton regulation through Rac 1	38	0.0194279	0.186132	0.0194279	0.186132	4	Cytohesin2, Actin cytoskeletal, VIL2 (ezrin), Actin
31	Cell adhesion_Integrin-matrix adhesion_alpha-2_beta-1 integrin	38	0.0194279	0.186132	0.0194279	0.186132	4	RhoGDI alpha, Actin cytoskeletal, VIL2 (ezrin), Actin
32	Cell cycle_H2A histone	39	0.021202	0.194175	0.021202	0.194175	4	Histone H2, Actin cytoskeletal, Histone H1, Actin
33	Signal transduction_EGFR-signaling	59	0.0220428	0.194175	0.0220428	0.194175	5	p38 MAPK, GSK3 alpha/beta, p38beta (MAPK11), IRS-1, c-Myc
34	Cell adhesion_Integrins signaling to c-Myc	60	0.0235363	0.194175	0.0235363	0.194175	5	GSK3 alpha/beta, IRS-1, Tcf(Lef), c-Myc, Cyclin D1
35	Chemotaxis_PAI1, Fibronectin, VEGF-A, Plasmin signaling	60	0.0235363	0.194175	0.0235363	0.194175	5	p38 MAPK, p38beta (MAPK11), Actin cytoskeletal, Cyclin D1, Actin
36	Chemotaxis_PAI1, Fibronectin, VEGF-A, Thrombopoietin signaling	60	0.0235363	0.194175	0.0235363	0.194175	5	p38 MAPK, p38beta (MAPK11), Actin cytoskeletal, Cyclin D1, Actin
37	Apoptosis_Signaling to Survivin	61	0.025094	0.196129	0.025094	0.196129	5	TNF-R1, Angiopoietin 2, TNF-R2, Tcf(Lef), WNT
38	Cell cycle_AKT signaling	61	0.025094	0.196129	0.025094	0.196129	5	GSK3 alpha/beta, TCF7L2 (TCF4), Tcf(Lef), c-Myc, Cyclin D1
39	Development_Osteoblast differentiation	62	0.0267166	0.199554	0.0267166	0.199554	5	BETA-PIX, Adenylate cyclase, PKA-cat (cAMP-dependent), Actin cytoskeletal, Actin
40	Cell adhesion_Cadherins	24	0.026876	0.199554	0.026876	0.199554	3	FAT1, Actin cytoskeletal, Actin
41	Cell adhesion_Integrin-matrix adhesion_alpha-V_beta-3 integrin	43	0.0292745	0.212062	0.0292745	0.212062	4	RhoGDI alpha, Actin cytoskeletal, VIL2 (ezrin), Actin
42	Cell adhesion_PTP-1B	11	0.0350396	0.24778	0.0350396	0.24778	2	Actin cytoskeletal, Actin
43	Signal transduction_Plasminogen	69	0.0399536	0.269687	0.0399536	0.269687	5	p38 MAPK, HABP2, p38beta (MAPK11), Actin cytoskeletal, Actin
44	Signal transduction_v-Akt murine thymoma viral oncogene homolog 2	69	0.0399536	0.269687	0.0399536	0.269687	5	GSK3 alpha/beta, TCF7L2 (TCF4), Tcf(Lef), c-Myc, Cyclin D1
45	Cell adhesion_MMP-2 signaling	48	0.0416201	0.274692	0.0416201	0.274692	4	Tcf(Lef), c-Myc, Actin cytoskeletal, Actin
46	Cell adhesion_Cytoskeleton regulation through RhoA	29	0.0439778	0.283943	0.0439778	0.283943	3	Actin cytoskeletal, VIL2 (ezrin), Actin
47	Cell cycle_Bloom syndrome_p53 signaling	13	0.0479569	0.303047	0.0479569	0.303047	2	CDC25B, GADD45 beta
48	Cell cycle_Cyclin E	51	0.0502473	0.310905	0.0502473	0.310905	4	Ubiquitin, Cyclin D, Histone H1, Cyclin D1
49	Metabolism_Protein biosynthesis	52	0.053326	0.316756	0.053326	0.316756	4	ZFP36(Tristetraprolin), RPS2, RPL13, TISB
50	Metabolism_Lipid metabolism_Leptin regulation	52	0.053326	0.316756	0.053326	0.316756	4	SREBP1 precursor, SREBP1 (nuclear), PPAR-alpha, IRS-1

## Sheet: CDK8_SE_Pathway Maps
Enrichment analysis report
Enrichment by Pathway Maps					CDK8 Super-enhancer genes HCT-116_genelist
#	Maps	Total	pValue	Min FDR	p-value	FDR	In Data	Network Objects from Active Data
1	Inhibition of Calcitriol/ VDR signaling in colorectal cancer	51	1.12322e-07	9.14298e-05	1.12322e-07	9.14298e-05	9	JunB, Plectin 1, ID2, ID1, CYP24A1, TCF7L2 (TCF4), DKK1, c-Myc, JunD
2	Stem cells_Cooperation between Hedgehog, IGF-2 and HGF signaling pathways in medulloblastoma stem cells	32	6.50606e-07	0.000264797	6.50606e-07	0.000264797	7	Bcl-XL, HGF receptor (Met), TCF7L2 (TCF4), IRS-1, Tcf(Lef), c-Myc, Cyclin D1
3	Development_Beta adrenergic receptors in brown adipocyte differentiation	37	1.85792e-06	0.000329678	1.85792e-06	0.000329678	7	G3P2, p38 MAPK, Adenylate cyclase, PKA-cat (cAMP-dependent), SCD, FASN, PPAR-alpha
4	Regulation of metabolism_Bile acids regulation of glucose and lipid metabolism via FXR	37	1.85792e-06	0.000329678	1.85792e-06	0.000329678	7	GSK3 alpha/beta, NIPK, SREBP1 precursor, SREBP1 (nuclear), SCD, FASN, PPAR-alpha
5	Development_Insulin, IGF-1 and TNF-alpha in brown adipocyte differentiation	53	2.02505e-06	0.000329678	2.02505e-06	0.000329678	8	G3P2, PKA-cat (cAMP-dependent), TNF-R1, SREBP1 (nuclear), SCD, FASN, PPAR-alpha, IRS-1
6	PGE2 pathways in cancer	55	2.70577e-06	0.000367083	2.70577e-06	0.000367083	8	Amphiregulin, Adenylate cyclase, PKA-cat (cAMP-dependent), NURR1, TCF7L2 (TCF4), Tcf(Lef), c-Myc, Cyclin D1
7	WNT signaling in HCC	40	3.2286e-06	0.00037544	3.2286e-06	0.00037544	7	WNT7B, TCF7L2 (TCF4), Tcf(Lef), DKK1, c-Myc, WNT, Cyclin D1
8	LRRK2 in neurons in Parkinson's disease	33	1.32971e-05	0.00135298	1.32971e-05	0.00135298	6	Ubiquitin, PKA-cat (cAMP-dependent), Actin cytoplasmic 2, eEF1A, Actin cytoskeletal, VIL2 (ezrin)
9	ERBB family and HGF signaling in gastric cancer	54	2.53111e-05	0.00175009	2.53111e-05	0.00175009	7	p38 MAPK, Amphiregulin, HGF receptor (Met), TCF7L2 (TCF4), c-Myc, Epiregulin, Cyclin D1
10	G protein-coupled receptors signaling in lung cancer	74	2.57428e-05	0.00175009	2.57428e-05	0.00175009	8	Amphiregulin, PKA-cat (cAMP-dependent), Bcl-XL, Galpha(q)-specific peptide GPCRs, NTSR1, Galpha(i)-specific peptide GPCRs, SSTR5, Cyclin D1
11	Action of GSK3 beta in bipolar disorder	23	2.8953e-05	0.00175009	2.8953e-05	0.00175009	5	NeuroD1 (NDF1), TCF7L2 (TCF4), Tcf(Lef), c-Myc, Cyclin D1
12	Stem cells_Aberrant Wnt signaling in medulloblastoma stem cells	23	2.8953e-05	0.00175009	2.8953e-05	0.00175009	5	TCF7L2 (TCF4), DKK1, c-Myc, WNT, Cyclin D1
13	WNT signaling in proliferative-type melanoma cells	38	3.09789e-05	0.00175009	3.09789e-05	0.00175009	6	WNT7B, NURR1, DKK1, c-Myc, WNT, Cyclin D1
14	Regulation of lipid metabolism_Regulation of lipid metabolism via LXR, NF-Y and SREBP	38	3.09789e-05	0.00175009	3.09789e-05	0.00175009	6	SREBP1 precursor, SREBP1 (nuclear), SCD, FASN, SREBP1 (Golgi membrane), Caveolin-1
15	Development_YAP/TAZ-mediated co-regulation of transcription	56	3.22498e-05	0.00175009	3.22498e-05	0.00175009	7	ID2, Bcl-XL, ID3, ID1, c-Myc, PUMA, Cyclin D1
16	IGF family signaling in colorectal cancer	60	5.0843e-05	0.00258664	5.0843e-05	0.00258664	7	GSK3 alpha/beta, Bcl-XL, IBP, MNK2(GPRK7), IRS-1, MAT2A, Cyclin D1
17	Signal transduction_AKT signaling	43	6.39473e-05	0.00306195	6.39473e-05	0.00306195	6	GSK3 alpha/beta, Bcl-XL, HGF receptor (Met), IRS-1, c-Myc, Cyclin D
18	HGF signaling in colorectal cancer	64	7.74259e-05	0.00346062	7.74259e-05	0.00346062	7	HGF receptor (Met), TCF7L2 (TCF4), c-Myc, Actin cytoskeletal, Cyclin D1, VIL2 (ezrin), JunD
19	Cytoskeleton remodeling_TGF, WNT and cytoskeletal remodeling	111	8.07761e-05	0.00346062	8.07761e-05	0.00346062	9	p38 MAPK, TCF7L2 (TCF4), Tcf(Lef), c-Myc, Actin cytoskeletal, WNT, Cyclin D1, Caveolin-1, Actin
20	Adiponectin in pathogenesis of type 2 diabetes	29	9.43958e-05	0.00384191	9.43958e-05	0.00384191	5	SREBP1 precursor, SREBP1 (nuclear), SCD, FASN, PPAR-alpha
21	Ligand-independent activation of Androgen receptor in Prostate Cancer	67	0.000104033	0.00394852	0.000104033	0.00394852	7	Bcl-XL, IRS-1, Tcf(Lef), PP2A regulatory, c-Myc, FGF1, Cyclin D1
22	Development_PIP3 signaling in cardiac myocytes	47	0.000106717	0.00394852	0.000106717	0.00394852	6	GSK3 alpha/beta, Bcl-XL, HGF receptor (Met), IRS-1, c-Myc, Cyclin D
23	Main genetic and epigenetic alterations in lung cancer	48	0.00012033	0.00425863	0.00012033	0.00425863	6	MSP, Bcl-XL, IBP, HGF receptor (Met), c-Myc, Cyclin D1
24	NETosis in SLE	31	0.000131542	0.00440489	0.000131542	0.00440489	5	Histone H2, Histone H2A, p38 MAPK, Histone H1.2, Histone H1
25	Development_Thromboxane A2 signaling pathway	49	0.000135285	0.00440489	0.000135285	0.00440489	6	p38 MAPK, GSK3 alpha/beta, Adenylate cyclase, PKA-cat (cAMP-dependent), Tcf(Lef), Cyclin D1
26	Development_IGF-1 receptor signaling	52	0.000189161	0.00592218	0.000189161	0.00592218	6	GSK3 alpha/beta, Bcl-XL, IBP, IRS-1, c-Myc, Cyclin D
27	Development_WNT signaling pathway. Part 2	53	0.000210458	0.00615276	0.000210458	0.00615276	6	TCF7L2 (TCF4), Tcf(Lef), DKK1, c-Myc, WNT, Cyclin D1
28	Development_WNT signaling pathway. Part 1. Degradation of beta-catenin in the absence WNT signaling	19	0.000219201	0.00615276	0.000219201	0.00615276	4	Casein kinase I delta, Ubiquitin, TCF7L2 (TCF4), Tcf(Lef)
29	Regulation of lipid metabolism_Regulation of fatty acid synthase activity in hepatocytes	19	0.000219201	0.00615276	0.000219201	0.00615276	4	SREBP1 precursor, SREBP1 (nuclear), FASN, SREBP1 (Golgi membrane)
30	Role of activation of WNT signaling in the progression of lung cancer	77	0.000250956	0.00674019	0.000250956	0.00674019	7	p38 MAPK, TCF7L2 (TCF4), Tcf(Lef), DKK1, c-Myc, WNT, Cyclin D1
31	WNT signaling in gastric cancer	36	0.000273251	0.00674019	0.000273251	0.00674019	5	Ubiquitin, TCF7L2 (TCF4), Tcf(Lef), WNT, Cyclin D1
32	Cell adhesion_Tight junctions	36	0.000273251	0.00674019	0.000273251	0.00674019	5	Claudin-4, Tcf(Lef), ZO-3, Caveolin-1, Actin
33	E-cadherin signaling and its regulation in gastric cancer	36	0.000273251	0.00674019	0.000273251	0.00674019	5	Ubiquitin, HGF receptor (Met), FGF1, WNT, Actin
34	IL-6 signaling in colorectal cancer	37	0.000311815	0.00746522	0.000311815	0.00746522	5	Bcl-XL, SOCS3, TNF-R2, c-Myc, Cyclin D1
35	Cell cycle_Regulation of G1/S transition (part 1)	38	0.000354366	0.00824154	0.000354366	0.00824154	5	JunB, Ubiquitin, PP2A regulatory, Cyclin D, Cyclin D1
36	Cell cycle progression in Prostate Cancer	39	0.000401167	0.00907082	0.000401167	0.00907082	5	p38 MAPK, CDC25B, Tcf(Lef), WNT, Cyclin D1
37	EGFR signaling pathway in colorectal cancer	60	0.000417732	0.00919009	0.000417732	0.00919009	6	Amphiregulin, Bcl-XL, NTSR1, ABCC2, Epiregulin, Cyclin D1
38	Stem cells_Response to hypoxia in glioblastoma stem cells	40	0.000452487	0.00920811	0.000452487	0.00920811	5	Ubiquitin, ID1, Jagged2, HES1, Cyclin D1
39	Development_Astrocyte differentiation from adult stem cells	40	0.000452487	0.00920811	0.000452487	0.00920811	5	ID2, ID3, ID1, HES1, LIF
40	Inhibition of Vitamin D pathway in Prostate Cancer	40	0.000452487	0.00920811	0.000452487	0.00920811	5	VDB, Bcl-XL, CYP24A1, PPAR-alpha, Cyclin D1
41	CFTR-dependent regulation of ion channels in CF	41	0.000508603	0.0100976	0.000508603	0.0100976	5	PKA-cat (cAMP-dependent), SK4/IK1, alpha-ENaC, Actin cytoskeletal, VIL2 (ezrin)
42	Transcription_Sirtuin6 regulation and functions	64	0.000592878	0.0114791	0.000592878	0.0114791	6	Ubiquitin, SREBP1 precursor, SREBP1 (nuclear), SCD, FASN, SREBP1 (Golgi membrane)
43	Regulation of lipid metabolism_Insulin regulation of fatty acid metabolism	89	0.000610555	0.0114791	0.000610555	0.0114791	7	PKA-cat (cAMP-dependent), SREBP1 precursor, SREBP1 (nuclear), SCD, FASN, SREBP1 (Golgi membrane), IRS-1
44	Cytoskeleton remodeling_Hyaluronic acid/ CD44 signaling pathways	43	0.000636355	0.0114791	0.000636355	0.0114791	5	HGF receptor (Met), RhoGDI alpha, Actin cytoskeletal, VIL2 (ezrin), Actin
45	Development_Role of IL-8 in angiogenesis	65	0.000644466	0.0114791	0.000644466	0.0114791	6	Ubiquitin, SREBP1 precursor, SREBP1 (nuclear), FASN, SREBP1 (Golgi membrane), Caveolin-1
46	Cell cycle_Initiation of mitosis	25	0.000662795	0.0114791	0.000662795	0.0114791	4	Lamin B, CDC25B, c-Myc, Histone H1
47	HBV-dependent transcription regulation leading to HCC	25	0.000662795	0.0114791	0.000662795	0.0114791	4	SREBP1 precursor, SCD, FASN, Cyclin D1
48	Canonical WNT signaling pathway in colorectal cancer	66	0.000699468	0.011771	0.000699468	0.011771	6	HGF receptor (Met), TCF7L2 (TCF4), DKK1, c-Myc, WNT, Cyclin D1
49	Influence of smoking on activation of EGFR signaling in lung cancer cells	44	0.000708573	0.011771	0.000708573	0.011771	5	Amphiregulin, Adenylate cyclase, PKA-cat (cAMP-dependent), p38beta (MAPK11), Epiregulin
50	Role of alpha-6/beta-4 integrins in carcinoma progression	45	0.00078675	0.0128083	0.00078675	0.0128083	5	MSP, Plectin 1, HGF receptor (Met), IRS-1, Actin cytoskeletal
