# Supplementary material for: Assessing the mechanism and therapeutic potential of modulators of the human Mediator complex-associated protein kinases
Source: eLife. 2016 Dec 9;5:e20722. doi: 10.7554/eLife.20722 (PMC5224920; doi:10.7554/eLife.20722)
Supplement: Figure 5—source data 1. — DOI: http://dx.doi.org/10.7554/eLife.20722.020 [file elife-20722-fig5-data1.xlsx]

## Sheet: Information
FIG5_ANTIBODIES	Antibodies used for FACS of mouse intestinal epithelial cells.
FIG5_PCR_PRIMERS	Primers used for RT-PCR of gene transcripts in total RNA isolated from mouse intestinal cells.

## Sheet: FIG5_ANTIBODIES
Purpose	Reagent name (stock)	Supplier	Cat No.	mL/106 cells
Dead cells	DAPI (1M)	Sigma	D8417	2
PBLs	PE-Cy5-Anti-Mouse CD45 (0.2mg/ml)	eBioscience	15-0451-82	33
			RRID:AB_468752
Differentiated cells	PE/Cy7-conjugated anti-CD44 (0.2mg/ml)	Biolegend	103030	33
			RRID:AB_830787
	eFluor PE/Cy5-conjugated anti-CD24 (0.2mg/ml)	eBioscience	15-0242-82	33
			RRID:AB_468731
	PE-conjugated anti- CD166 (Alcam) antibody (25μg/ml)	R&D systems	FAB1172p	67
			RRID:AB_2242595
Stem/TA Cells	Rabbit anti-GRP78 (ET-21) (10.7mg/ml)	Sigma	G9043	17
			RRID:AB_2279879
	Anti-rabbit IgG Alexa 488 (0.4mg/ml)	Life Technologies	A-11034	33
			RRID:AB_2576217

## Sheet: FIG5_PCR_PRIMERS
Gene	Expression	Direction	Sequence
Actb1	Reference control	Forward	TGTTACCAACTGGGACGACA
		Reverse	GGGGTGTTGAAGGTCTCAAA
Axin2	Stem + some TA cells	Forward	GCAGCTCAGCAAAAAGGGAAAT
		Reverse	TACATGGGGAGCACTGTCTCGT
Lgr5	Stem cells	Forward	CCTTGGCCCTGAACAAAATA
		Reverse	ATTTCTTTCCCAGGGAGTGG
Ascl2	Stem cells	Forward	CAGGAGCTGCTTGACTTTTCCA
		Reverse	GGGCTAGAAGCAGGTAGGTCCA
Myc	Stem + all TA cells	Forward	CTAGTGCTGCATGAGGAGACAC
		Reverse	GTAGTTGTGCTGGTGAGTGGAG
Suz12	Stem + all TA cells	Forward	CGCCAACCTGGATTTGCTTTTAG
		Reverse	CACTGCTGTATGTTCTCTGCTGCTC
Mki67	TA cells + dividing stem cells	Forward	ATCATTGACCGCTCCTTTAGGT
		Reverse	GCTCGCCTTGATGGTTCCT
Car4	Differentiated cells	Forward	CTGCTAGGACAAAGGTGAACC
		Reverse	CTCCACTGTGTGTTGATTGTTCT
