# Supplementary material for: Assessing the mechanism and therapeutic potential of modulators of the human Mediator complex-associated protein kinases
Source: eLife. 2016 Dec 9;5:e20722. doi: 10.7554/eLife.20722 (PMC5224920; doi:10.7554/eLife.20722)
Supplement: Figure 6—source data 1. — DOI: http://dx.doi.org/10.7554/eLife.20722.023 [file elife-20722-fig6-data1.xlsx]

## Sheet: Figure6_culture conditions
	Cells	Stimuli	Model	Readouts
BT	B cells + PBMCs	anti-IgM/TCRlo	T cell-dependent B cell activation in germinal centres	B cell proliferation; PBMC cytotoxicity; secreted IgG; sIL-17A; sIL-17F; sIL-2; sIL-6; sTNF-alpha
BF4T	Bronchial epithelial cells + fibroblasts	IL-4/TNF-a	Th2-type lung inflammation	CCL2; CCL26; CD106; CD54; CD90; IL-8; IL-1a; Keratin 8/18; MMP-1; MMP-3; MMP-9; PAI-I; proliferation; tPA; uPA
BENo	Bronchial epithelial cells	None	Response to pro-inflammatory stimuli	CCL26; CD54; uPAR; CXCL10; CXCL11; IL-8; CXCL9; EGFR; HLA-DR; IL-1alpha; Keratin 8/18; MMP-1; MMP-9; PAI-I; SRB; tPA; uPA
/HDF3CT	Fibroblasts	Il-1β/TNF-α/IFN-γ/TGF-β	TH1-type inflammation	CCL2; CD106; CD54; Collagen I; CXCL10; IL-8; CXCL9; M-CSF; MMP-1; PAI-I; SRB; TIMP-2
/HDFNo	Fibroblasts	None	Response to pro-inflammatory stimuli	CCL2; CD106; CD54; Collagen I; Collagen III; CXCL10; CXCL11; IL-8; CXCL9; EGFR; M-CSF; MMP-1; PAI-I; proliferation_72 h; SRB; TIMP-1; TIMP-2
HDF3CGF	Fibroblasts	IL-1β/TNF-α/IFN-γ/EGF/bFGF/PDGF	TH1-type inflammation	CCL2; CD106; CD54; Collagen I; Collagen III; CXCL10; CXCL11; IL-8; CXCL9; EGFR; M-CSF; MMP-1; PAI-I; proliferation_72 h; SRB; TIMP-1; TIMP-2
/Mphg	HUVECs + primary macrophages	TLR2 ligand	TH1-type chronic inflammation and macrophage activation	CCL2; CCL3; CD106; CD40; CD62E; CD69; IL-8; IL-1alpha; M-CSF; sIL-10; SRB
LPS	HUVEC + PBMCs	LPS	Th1 type chronic inflammation and monocyte activation	CCL2; CD106; CD141; CD142; CD40; CD62E; CD69; IL-8; IL-1alpha; M-CSF; sPGE2; SRB; sTNF-alpha
HPNo	HUVEC + PBMCs	None	Basal endothelial cell/ T cell interactions	CCL2; CD106; CD141; CD142; CD38; CD40; CD62E; CD69; IL-8; CXCL9/MIG; M-CSF; sPGE2; SRB; sTNF-alpha
Sag	HUVEC + PBMCs	TCR	Th1 and T cell effector response	CCL2; CD38; CD40; CD62E; CD69; IL-8; SAg: CXCL9; cytotoxicity; proliferation; SRB
/th2	HUVEC + Th2 Blasts	TCR/IL-2	Vascular inflammation in a TH1/2 environment	CCL2; CCL26; CD106; CD38; CD40; CD62E; CD62P; CD69; uPAR; Collagen IV; IL-8; CXCL9; PBMC cytotoxicity; sIL-17A; sIL-17F; SRB
3C	HUVEC	IL-1β//TNF-α/IFN-γ	vascular inflammation in a TH1 environment	CCL2; CD106; CD141; CD142; CD54; CD62E; uPAR; IL-8; CXCL9; HLA-DR; proliferation; SRB

## Sheet: Figure6_sourcedata
MODEL	Model	END-POINT	CMPD1 1.00E4 nM	CMPD1 1.00E3 nM	CMPD1 1.00E2 nM	CMPD1 1.00E1 nM	CMPD1 1.00E0 nM	CMPD2 1.00E4 nM	CMPD2 1.00E3 nM	CMPD2 1.00E2 nM	CMPD2 1.00E1 nM	CMPD2 1.00E0 nM	CMPD 3 1.00E4 nM	CMPD3 1.00E3 nM	CMPD3 1.00E2 nM	CMPD3 1.00E1 nM	CMPD3 1.00E0 nM	CMPD4 1.00E4 nM	CMPD4 3.33E3 nM	CMPD4 1.11E3 nM	CMPD4 3.70E2 nM	CMPD4 1.23E2 nM	CMPD4 4.12E1 nM	CMPD4 1.37E1 nM	CMPD4 4.57E0 nM
BT	B cells co-cultured with peripheral blood mononuclear cells and stimulated with anti-IgM and mild T cell receptor stimulation to simulate T cell-dependent B cell activation that occurs in a germinal centre	B cell Proliferation	-0.188255	-0.061526	-0.04227	-0.0416662	0.00341959	-0.0767831	-0.0271376	-0.0569939	-0.0326057	-0.0104573	-0.233295	-0.057633	-0.0562288	-0.0112716	0.00438282	-0.0132311	-0.0184447	0.005131	-0.071703	0.0270597	-0.0401334	-0.0119126	0.00187736
BT	B cells co-cultured with peripheral blood mononuclear cells and stimulated with anti-IgM and mild T cell receptor stimulation to simulate T cell-dependent B cell activation that occurs in a germinal centre	PBMC Cytotoxicity	-0.0629971	-0.0443583	-0.0332152	-0.0151553	0.0536838	-0.0463276	-0.0328915	-0.030268	-0.0301274	0.0315177	-0.0916259	-0.0496023	-0.0270741	-0.016216	0.0335011	-0.0195284	-0.00187656	0.00763797	-0.00304218	0.0181635	-0.0109014	0.0107733	0.00865299
BT	B cells co-cultured with peripheral blood mononuclear cells and stimulated with anti-IgM and mild T cell receptor stimulation to simulate T cell-dependent B cell activation that occurs in a germinal centre	Secreted IgG	-0.511575	-0.308657	-0.110486	-0.0462831	-0.0280996	-0.114036	0.0741527	-0.186139	-0.162762	0.0879264	-0.611446	-0.370319	-0.164828	0.0260435	-0.0736454	-0.33151	-0.298212	-0.271115	-0.278294	-0.255838	-0.160908	-0.141233	0.00641799
BT	B cells co-cultured with peripheral blood mononuclear cells and stimulated with anti-IgM and mild T cell receptor stimulation to simulate T cell-dependent B cell activation that occurs in a germinal centre	sIL-17A	-0.116031	0.22879	0.172996	0.254428	-0.0248482	0.256263	0.216186	0.214014	0.173025	-0.0606663	0.163674	0.262791	0.183691	0.0950795	0.110482	0.321232	0.312206	0.279995	0.240383	0.184843	0.262725	0.187456	0.0293709
BT	B cells co-cultured with peripheral blood mononuclear cells and stimulated with anti-IgM and mild T cell receptor stimulation to simulate T cell-dependent B cell activation that occurs in a germinal centre	sIL-17F	-0.842128	-0.566615	-0.460666	-0.157447	-0.118213	-0.593726	-0.463035	-0.485499	-0.239256	-0.213381	-0.873719	-0.522412	-0.383826	-0.398935	-0.037385	-0.396676	-0.374046	-0.401755	-0.290097	-0.281646	-0.162912	-0.00189833	-0.026856
BT	B cells co-cultured with peripheral blood mononuclear cells and stimulated with anti-IgM and mild T cell receptor stimulation to simulate T cell-dependent B cell activation that occurs in a germinal centre	sIL-2	-0.511707	-0.0688963	0.0427409	0.0438841	0.0944781	-0.00738831	0.0681289	0.108712	0.264141	0.154336	-0.213311	-0.0830992	0.0839879	0.0172354	0.109969	0.0056061	-0.0661318	-0.0103447	-0.00489875	0.0138247	0.0321251	0.0141904	0.0589902
BT	B cells co-cultured with peripheral blood mononuclear cells and stimulated with anti-IgM and mild T cell receptor stimulation to simulate T cell-dependent B cell activation that occurs in a germinal centre	sIL-6	-0.404672	-0.0480302	-0.00193864	0.0585203	-0.0260131	-0.0746401	0.0463606	0.0348038	0.0573467	0.00535714	-0.492959	-0.14728	0.0458039	-0.0160513	0.00820099	-0.0273428	0.00983119	0.0114629	-0.000869423	0.0303381	0.0453472	0.0265847	-0.0125224
BT	B cells co-cultured with peripheral blood mononuclear cells and stimulated with anti-IgM and mild T cell receptor stimulation to simulate T cell-dependent B cell activation that occurs in a germinal centre	sTNF-alpha	-0.619786	-0.00855752	0.00469503	0.0358387	0.0678776	0.00915371	0.0763363	0.0591931	0.0513904	0.0974768	-0.248613	-0.113621	0.0222929	-0.0206638	0.0891814	0.0861665	0.0926809	0.0633482	0.057444	0.0573286	0.0250106	0.0462488	0.0438735
BF4T	peripheral blood mononuclear cells co-cultured with fibroblasts and stimulated with IL-4 and TNF-α to model a Th2-type lung inflammation	CCL2/MCP-1	-0.0947594	-0.0753324	-0.0553993	-0.0303098	0.0276427	-0.0342153	-0.0163508	-0.0245686	-0.0112926	0.0218107	-0.00968635	-0.0421332	-0.0336855	-0.010991	-0.0335796	-0.0104186	-0.0614825	-0.0446221	-0.0387312	-0.0668104	-0.0188846	0.00745977	0.0408629
BF4T	peripheral blood mononuclear cells co-cultured with fibroblasts and stimulated with IL-4 and TNF-α to model a Th2-type lung inflammation	CCL26/Eotaxin-3	-0.122047	-0.119152	-0.13085	-0.0645393	-0.0193654	-0.125327	-0.101943	-0.0855007	-0.107291	-0.0321654	-0.0917771	-0.0983747	-0.0853895	-0.0711634	-0.0118815	-0.144221	-0.183688	-0.209173	-0.176887	-0.191178	-0.203357	-0.133913	-0.0859029
BF4T	peripheral blood mononuclear cells co-cultured with fibroblasts and stimulated with IL-4 and TNF-α to model a Th2-type lung inflammation	CD106/VCAM-1	-0.0639491	-0.0353802	-0.0154819	0.0180033	-0.00586449	0.0434346	0.0435311	0.0424686	0.0333808	0.0430485	0.00481192	-0.0232871	-0.00977317	-0.0042462	0.0665448	-0.0256394	0.00210231	-0.0206041	-0.0040283	-0.0119303	-0.036213	-0.0284977	-0.0176417
BF4T	peripheral blood mononuclear cells co-cultured with fibroblasts and stimulated with IL-4 and TNF-α to model a Th2-type lung inflammation	CD54/ICAM-1	-0.0765019	-0.0719605	-0.058547	-0.0322677	-0.00393772	-0.0426349	-0.0223281	-0.0203487	-0.0272538	-0.003611	-0.0421479	-0.0347805	-0.0338564	-0.03494	0.00691947	-0.0919444	-0.0737711	-0.0864199	-0.0755772	-0.057556	-0.043918	-0.0566526	-0.034452
BF4T	peripheral blood mononuclear cells co-cultured with fibroblasts and stimulated with IL-4 and TNF-α to model a Th2-type lung inflammation	CD90	-0.0352408	-0.00385405	0.0162593	0.00892024	0.00579107	0.000653879	-0.000476168	0.00207712	-0.00904656	-0.0357572	0.0165171	0.00842459	0.00328912	0.00490967	-0.0212116	-0.00365805	0.0110745	-0.00131057	-0.00566695	-0.00126421	0.00440028	-0.0109435	-0.00015313
BF4T	peripheral blood mononuclear cells co-cultured with fibroblasts and stimulated with IL-4 and TNF-α to model a Th2-type lung inflammation	CXCL8/IL-8	-0.0141585	0.0223267	0.0254816	0.0307609	0.011828	0.0295813	0.0471017	0.0497237	0.0477716	0.0397168	0.0221629	0.0300106	0.0396119	0.0456555	0.013224	0.01678	-0.0423104	-0.056087	-0.0423622	-0.020754	-0.0305665	-0.0240168	0.0244367
BF4T	peripheral blood mononuclear cells co-cultured with fibroblasts and stimulated with IL-4 and TNF-α to model a Th2-type lung inflammation	IL-1alpha	-0.0645927	-0.0440487	-0.0323645	0.0239821	0.0154155	-0.00143077	-0.00456149	0.00135564	0.0202984	0.00719323	-0.00203889	-0.00940345	-0.00155233	0.00790753	0.00747115	-0.0392354	-0.0549292	-0.038468	-0.090484	-0.0197099	-0.037804	-0.0235454	-0.0203468
BF4T	peripheral blood mononuclear cells co-cultured with fibroblasts and stimulated with IL-4 and TNF-α to model a Th2-type lung inflammation	Keratin 8/18	0.0399274	0.0302366	-0.00761421	0.0149007	-0.0043499	-0.0230616	0.00669113	0.00929751	-0.00934217	-0.000996697	0.0380685	0.0344834	0.0174584	0.00924222	0.00255549	-0.0201822	-0.0222089	0.0201353	-0.0119077	-0.0222624	0.00848786	-0.00271319	-0.00266209
BF4T	peripheral blood mononuclear cells co-cultured with fibroblasts and stimulated with IL-4 and TNF-α to model a Th2-type lung inflammation	MMP-1	0.0147549	-0.00553173	-0.00866418	-0.00251111	0.0044368	0.0103504	0.0146116	0.00811679	0.0220259	0.0297587	0.00226092	0.000873251	-0.00939027	-0.00364512	0.0130905	-0.0162478	-0.0115872	-0.0162957	-0.00777237	0.00134512	-0.00204287	-0.0154596	0.000793778
BF4T	peripheral blood mononuclear cells co-cultured with fibroblasts and stimulated with IL-4 and TNF-α to model a Th2-type lung inflammation	MMP-3	0.0345826	0.00782356	0.022966	0.00665164	0.0548276	0.0274636	0.0342156	0.0531615	0.07484	0.0817225	0.0729973	0.0304363	0.0318228	0.0234367	0.0561385	0.0139846	-0.0481048	-0.00649746	0.0150946	-0.00735684	0.0270081	0.0490346	0.0542377
BF4T	peripheral blood mononuclear cells co-cultured with fibroblasts and stimulated with IL-4 and TNF-α to model a Th2-type lung inflammation	MMP-9	-0.0764873	-0.0699443	-0.0287061	0.023213	0.0296945	-0.0069979	0.0242598	0.00778585	0.0116115	0.0387337	0.0098692	-0.00872988	-0.0195362	0.00711706	0.0304881	-0.03053	-0.00425139	-0.0114687	-0.0178838	-0.0468985	-0.0112868	-0.0257092	-0.0227115
BF4T	peripheral blood mononuclear cells co-cultured with fibroblasts and stimulated with IL-4 and TNF-α to model a Th2-type lung inflammation	PAI-I	-0.0730784	-0.0293553	-0.0190423	0.0188406	0.0271974	-0.012543	0.0258231	0.039288	0.0231508	-0.00834367	0.012523	0.0220325	-0.0014337	-0.00637864	0.0486564	-0.0593286	-0.0255558	-0.00268556	0.00297583	-0.0127741	-0.00940568	-0.0199372	0.0189538
BF4T	peripheral blood mononuclear cells co-cultured with fibroblasts and stimulated with IL-4 and TNF-α to model a Th2-type lung inflammation	SRB	0.00197319	0.00103689	0.00183956	0.00137151	0.00596321	0.00075225	0.00277413	4.82334e-05	-0.00107721	0.00410576	0.000467428	0.00178943	0.00275746	0.000433908	0.00349039	0.00387598	0.00625034	0.0113607	3.33628e-05	0.00468919	0.000730827	0.00489225	-0.00788082
BF4T	peripheral blood mononuclear cells co-cultured with fibroblasts and stimulated with IL-4 and TNF-α to model a Th2-type lung inflammation	tPA	-0.0591106	-0.034045	0.0214498	0.0485504	0.0516069	0.0371325	0.0707134	0.0631069	0.0466793	0.0510769	0.0282803	0.0450691	0.0412206	0.032383	0.0387042	-0.0218951	0.0149644	0.00680472	0.0272367	0.0316647	0.0249357	0.0485418	0.0570005
BF4T	peripheral blood mononuclear cells co-cultured with fibroblasts and stimulated with IL-4 and TNF-α to model a Th2-type lung inflammation	uPA	-0.0471585	-0.0290986	-0.00010885	0.0240562	0.0164106	0.0165223	0.0232317	0.0218539	0.0338844	0.0455383	-0.0354132	0.0191408	0.017304	-0.000166915	0.0348497	-0.00907378	-0.0194287	-0.0160811	-0.0216451	0.00318586	-0.000269632	0.00869126	-0.00537653
BENo	unstimulated primary bronchial epithelial cells for detection of inflammatory stimuli	CCL26/Eotaxin-3	-0.0101479	0.0237959	0.0116328	0.0104319	0.0242954	0.0476188	0.0204513	0.0382136	0.0359517	0.0712493	0.0417445	0.0158948	0.0292588	-0.0353638	0.0667456	0.0484035	-0.0256565	-0.0328883	-0.0283209	-0.0133483	0.0122205	0.0372875	0.0291696
BENo	unstimulated primary bronchial epithelial cells for detection of inflammatory stimuli	CD54/ICAM-1	0.025445	-0.0875114	-0.0142544	-0.0280559	0.0201933	-0.032507	-0.011201	-0.033894	0.0417284	0.05725	0.0164979	-0.0267925	-0.0864246	-0.015277	0.0166882	-0.115369	-0.0689485	-0.0805676	-0.0915388	-0.0915388	-0.0765822	-0.0618978	-0.040118
BENo	unstimulated primary bronchial epithelial cells for detection of inflammatory stimuli	CD87/uPAR	0.0230349	-0.0334032	0.0673891	0.0440017	0.119883	0.056862	0.0634359	0.110058	0.0622997	0.0498946	0.0383285	0.0419202	0.0744986	0.085691	0.0773925	-0.0140911	-0.0445281	-0.0493852	-0.0251122	-0.00224599	-0.0274277	0.0212095	0.0283011
BENo	unstimulated primary bronchial epithelial cells for detection of inflammatory stimuli	CXCL10/IP-10	0.0457409	-0.0256507	0.0457409	0.0415312	0.0364659	0.072621	0.136341	0.120511	0.118828	0.111689	0.0417326	0.0160198	0.0288591	0.0196363	0.114933	-0.00135101	-0.00592143	-0.0579226	-0.0167766	-0.00987758	-0.033236	-0.0132021	0.0565327
BENo	unstimulated primary bronchial epithelial cells for detection of inflammatory stimuli	CXCL11/I-TAC	0.0191283	-0.00869092	-0.00853134	0.035147	0.0250756	0.0252232	0.0444257	0.081755	0.091748	0.105461	0.0732481	0.0334122	0.0384529	0.032397	0.0385961	-0.0377303	-0.0437828	-0.0479129	-0.0363348	-0.021138	-0.035917	-0.0635005	-0.0352215
BENo	unstimulated primary bronchial epithelial cells for detection of inflammatory stimuli	CXCL8/IL-8	-0.0108662	-0.0335714	0.00674577	0.0182461	-0.00355418	0.0163745	0.0281879	0.0169512	0.0767585	0.0298696	0.0231034	-0.000243538	0.0498249	-0.0151891	0.0162302	-0.032836	-0.0353106	-0.0307845	-0.0273191	-0.0275222	0.0195942	-0.0252935	0.0388438
BENo	unstimulated primary bronchial epithelial cells for detection of inflammatory stimuli	CXCL9/MIG	0.0646322	0.0123407	0.00159024	0.0259298	0.0434115	0.0751723	0.0872536	0.0836644	0.0473477	0.0797423	0.0589468	0.033749	0.0272998	0.0245554	0.0683815	0.0824893	-0.0035725	-0.0035725	-0.00261696	-0.0181638	-0.00405106	-0.109789	0.0497006
BENo	unstimulated primary bronchial epithelial cells for detection of inflammatory stimuli	EGFR	-0.0188585	-0.0171592	0.021332	0.0293216	-0.0133702	0.0434721	0.0343838	0.0655992	0.0773699	0.0749341	0.00756325	0.0279442	-0.0284315	-0.00476277	0.000710179	0.00580168	0.00248241	0.00696495	-0.01423	0.012735	0.00425836	0.0114388	0.014801
BENo	unstimulated primary bronchial epithelial cells for detection of inflammatory stimuli	HLA-DR	-6.12444e-05	-0.0420423	-0.0220025	0.0242357	0.06826	0.0401569	0.115049	0.07477	0.114547	0.133929	0.0142371	0.0485614	0.00205687	0.0838848	0.047538	-0.0323543	0.0163788	0.0361408	-0.00944502	0.00212933	-0.0157852	0.0535603	0.0679205
BENo	unstimulated primary bronchial epithelial cells for detection of inflammatory stimuli	IL-1alpha	-0.0597282	-0.00285597	0.0418512	0.0483225	0.0434606	-0.0202967	0.0472852	0.078212	0.0475621	0.0664489	-0.0534843	0.018374	0.0244728	0.0213239	0.0477696	-0.0335953	-0.0316294	-0.0266924	-0.00882307	0.00800442	0.0102367	-0.0020709	-0.00546272
BENo	unstimulated primary bronchial epithelial cells for detection of inflammatory stimuli	Keratin 8/18	0.0848503	-0.00227763	0.0113705	-0.00703392	0.0337061	0.021834	0.0167118	0.0325033	0.0465761	0.0590049	0.0411492	0.0216797	0.0188146	0.031599	0.0505662	-0.0316596	-0.0328146	3.0465e-05	-0.0130822	-0.0214002	-0.0101284	-0.0183894	-0.0203261
BENo	unstimulated primary bronchial epithelial cells for detection of inflammatory stimuli	MMP-1	-0.0116839	-0.0555326	-0.00465177	0.0075852	0.0166497	0.0391718	0.0389261	0.0546969	0.0627607	0.0599593	-0.0262897	-0.000325016	-0.0438757	0.0218796	0.0280567	0.000562289	-0.0281184	-0.0384718	-0.0381156	-0.0347811	-0.0313318	-0.0370486	-0.0093886
BENo	unstimulated primary bronchial epithelial cells for detection of inflammatory stimuli	MMP-9	0.00265105	0.00908724	-0.0194696	0.00867038	0.03221	0.0310232	0.0557881	0.0154294	-0.0103695	-0.00102943	0.00964242	-0.0156302	-0.0124077	0.0255754	0.0427476	-0.0509714	-0.00863795	-0.00485323	-0.012243	-0.0864908	-0.00297316	-0.0348613	-0.019869
BENo	unstimulated primary bronchial epithelial cells for detection of inflammatory stimuli	PAI-I	-0.118437	-0.122263	-0.0709021	-0.0447086	-0.0104356	-0.100219	-0.0896445	-0.0347312	-0.0498224	-0.0178918	-0.144262	-0.0777049	-0.0793212	0.00289903	0.00954788	-0.0965208	-0.0908722	-0.107123	-0.0718026	-0.0606399	-0.0672098	-0.0450359	-0.000369549
BENo	unstimulated primary bronchial epithelial cells for detection of inflammatory stimuli	SRB	-0.000916062	0.00081171	0.00122126	-0.00117325	0.00319533	0.000999469	0.00290659	0.00209028	0.00135769	0.00451769	-0.0059849	0.000914134	-0.00125901	0.000675107	0.00193705	-0.0201573	-0.011157	0.007955	0.00841929	0.0145018	0.00253268	0.0227061	0.0181245
BENo	unstimulated primary bronchial epithelial cells for detection of inflammatory stimuli	tPA	-0.0135924	-0.0118216	-0.0140363	-0.00235313	0.0487033	0.0397725	0.0490875	0.0376751	0.0263595	0.0278406	0.0148797	-0.00815541	-0.0184998	-0.00177714	0.0143254	-0.114832	-0.0524187	-0.0472815	-0.0624379	-0.0287449	-0.0613376	0.00873766	0.00290054
BENo	unstimulated primary bronchial epithelial cells for detection of inflammatory stimuli	uPA	-0.00420565	-0.016555	0.0183533	0.000658929	0.014934	-0.00474954	0.0206179	0.0318673	0.026127	0.0259242	-0.0017125	0.00376525	0.039405	0.0343613	0.0355533	-0.0408841	-0.0516361	-0.00706488	-0.0188983	-0.019909	-0.0154675	-0.0141732	-0.0201472
/HDF3CT	Il-1β, TNF-α, IFN-γ and TGF-β stimulated human dermal fibroblasts modeling inflammation in a TH1 environment	CCL2/MCP-1	-0.124512	-0.142866	-0.121952	-0.054756	-0.0392701	-0.114494	-0.0939907	-0.108072	-0.0436226	-0.00225027	-0.0525751	-0.111468	-0.0686705	-0.0479058	-0.0104855	-0.123128	-0.101461	-0.115885	-0.0412666	-0.00420335	-0.0249416	0.0371578	0.071045
/HDF3CT	Il-1β, TNF-α, IFN-γ and TGF-β stimulated human dermal fibroblasts modeling inflammation in a TH1 environment	CD106/VCAM-1	-0.0469103	-0.0158882	0.00151624	0.0140719	0.011748	0.00608356	-0.000966613	0.0094557	0.018553	0.0193746	0.00905773	0.0207118	0.014902	0.00259523	0.0263173	0.00543743	0.0048559	0.00824466	0.0173427	0.0171252	0.0092207	0.018819	0.022488
/HDF3CT	Il-1β, TNF-α, IFN-γ and TGF-β stimulated human dermal fibroblasts modeling inflammation in a TH1 environment	CD54/ICAM-1	-0.0952077	-0.0880996	-0.0635302	-0.0511315	0.000785444	-0.089305	-0.0803283	-0.0730921	-0.067415	-0.029897	-0.0807677	-0.0613582	-0.0669889	-0.062459	-0.00804797	-0.0741992	-0.0677239	-0.0590399	-0.0594848	-0.0480621	-0.0542121	-0.0397589	-0.0295637
/HDF3CT	Il-1β, TNF-α, IFN-γ and TGF-β stimulated human dermal fibroblasts modeling inflammation in a TH1 environment	Collagen I	-0.0695773	-0.0833009	-0.0382302	-0.0402971	0.0310528	-0.0417795	-0.0640194	-0.0406919	-0.0382302	-0.000719925	0.00960396	0.027016	0.003671	0.0205466	0.0361294	-0.0503944	-0.0709225	-0.048394	-0.0404831	-0.0273567	-0.0360634	-0.0188212	0.00863226
/HDF3CT	Il-1β, TNF-α, IFN-γ and TGF-β stimulated human dermal fibroblasts modeling inflammation in a TH1 environment	CXCL10/IP-10	-0.0190492	0.00144542	0.00896236	0.0173643	-0.00264042	0.00940051	0.00749005	0.0106353	0.0223935	0.0060906	-0.000289661	0.00333035	0.0115846	0.0169088	0.00306905	-0.00785194	0.00204694	0.00171549	0.00746715	0.0106771	0.0234546	0.0216556	0.00293807
/HDF3CT	Il-1β, TNF-α, IFN-γ and TGF-β stimulated human dermal fibroblasts modeling inflammation in a TH1 environment	CXCL8/IL-8	-0.193101	-0.212473	-0.0926118	-0.0585814	-0.0422575	-0.20594	-0.181998	-0.154193	-0.0542982	-0.0271083	-0.14425	-0.189146	-0.0994543	-0.0281104	-0.0387736	-0.158677	-0.188651	-0.198872	-0.180259	-0.167459	-0.0894018	-0.0560227	-0.0334239
/HDF3CT	Il-1β, TNF-α, IFN-γ and TGF-β stimulated human dermal fibroblasts modeling inflammation in a TH1 environment	CXCL9/MIG	-0.0661635	-0.059106	-0.0294268	0.00287688	0.0114006	-0.0528954	-0.0431397	-0.0307962	0.0152081	0.0186489	-0.0494715	-0.0397916	-0.0223501	0.00967736	0.0198046	-0.0426802	-0.0527916	-0.050804	-0.0463251	-0.0401886	-0.015214	0.00152011	0.0191871
/HDF3CT	Il-1β, TNF-α, IFN-γ and TGF-β stimulated human dermal fibroblasts modeling inflammation in a TH1 environment	M-CSF	-0.128409	-0.0900447	-0.0835754	-0.0652466	-0.0131798	-0.06803	-0.0642074	-0.0445075	-0.0305178	0.0169731	-0.0917002	-0.00149473	-0.0236096	-0.0496629	0.00791059	-0.0346008	-0.0543855	-0.0522567	-0.0524995	-0.0505008	-0.0715481	-0.070661	-0.0719923
/HDF3CT	Il-1β, TNF-α, IFN-γ and TGF-β stimulated human dermal fibroblasts modeling inflammation in a TH1 environment	MMP-1	0.0366704	-0.0187304	0.0325878	0.0786481	0.0380436	0.0346025	0.0136267	0.0269987	0.112431	0.0718411	0.106882	0.0400952	0.0856294	0.0952402	0.0969304	-0.056697	-0.041862	-0.0434855	-0.0206727	0.00166156	0.048846	0.0828539	0.0858229
/HDF3CT	Il-1β, TNF-α, IFN-γ and TGF-β stimulated human dermal fibroblasts modeling inflammation in a TH1 environment	PAI-I	-0.29098	-0.14859	-0.117526	-0.0677476	-0.0224478	-0.12939	-0.119293	-0.0916975	-0.0531292	0.0183356	-0.207715	-0.122849	-0.0743738	-0.0269792	0.0387201	-0.205907	-0.183524	-0.121976	-0.0539992	-0.00645941	-0.00616031	0.0230348	0.0168406
/HDF3CT	Il-1β, TNF-α, IFN-γ and TGF-β stimulated human dermal fibroblasts modeling inflammation in a TH1 environment	SRB	-0.216594	-0.0111585	-0.0258198	-0.0345581	-0.0261614	0.00188633	-0.0196413	-0.00554567	-0.00569054	0.0136162	-0.229682	0.0033434	-0.0231718	-0.00714194	0.0073341	-0.00494348	0.00779302	0.00999606	0.0137849	0.00373391	0.0126677	0.00416869	0.0232967
/HDF3CT	Il-1β, TNF-α, IFN-γ and TGF-β stimulated human dermal fibroblasts modeling inflammation in a TH1 environment	TIMP-2	0.175334	0.0182231	0.00864681	0.0315279	0.00793426	0.0723677	0.0517191	0.0126156	0.0565916	0.0343555	0.27137	0.106978	0.0695303	0.0453542	0.0700251	0.00643411	0.0124308	0.0275865	0.0550158	0.0612014	0.105414	0.0685098	0.0884446
/HDFNo	Unstimulated primary dermal fibroblasts used to detect inflammatory stimuli	CCL2/MCP-1	-0.0766284	-0.100909	-0.0695003	-0.0717787	0.0506143	0.0676992	-0.0265038	0.018017	0.106591	0.0454131	0.0440544	0.025385	0.0417153	0.0274097	0.0278135	0.0395169	-0.0210931	0.0032589	-0.00483737	-0.00874644	0.00706185	-0.0219018	0.0245028
/HDFNo	Unstimulated primary dermal fibroblasts used to detect inflammatory stimuli	CD106/VCAM-1	-0.0442433	-0.0284411	-0.0199043	0.000327912	-0.0576352	0.0673035	0.0491207	0.0198523	0.050201	0.0659182	0.0295778	0.0261701	0.0653976	0.0478569	0.114442	0.0271775	-0.0341132	-0.0668953	-0.0583234	-0.0955208	-0.0468755	0.0203861	0.0103579
/HDFNo	Unstimulated primary dermal fibroblasts used to detect inflammatory stimuli	CD54/ICAM-1	-0.0970204	0.00785689	0.0260365	0.0242023	0.082883	0.0565541	0.0633256	0.0601069	0.090265	0.0989327	-0.0292539	0.0144007	-0.0134799	0.0735874	0.0657621	0.0939045	-0.00483028	-0.0480554	-0.0291164	-0.0132933	-0.0356106	-0.0235125	0.02817
/HDFNo	Unstimulated primary dermal fibroblasts used to detect inflammatory stimuli	Collagen I	0.0486158	-0.00565379	0.0373695	0.0103704	0.0511854	0.0707732	0.10754	0.0996214	0.0841904	0.073777	0.105864	0.0990923	0.0614427	0.0410835	0.0816257	0.0672076	-0.014116	-0.0217271	-0.0546956	-0.0654381	-0.0859505	-0.0803851	-0.0286844
/HDFNo	Unstimulated primary dermal fibroblasts used to detect inflammatory stimuli	Collagen III	0.0452564	0.0615542	0.0578131	0.016413	-0.0336974	0.0729438	0.0369883	0.06075	0.0418305	0.0405292	0.142727	0.10051	0.078669	0.032404	0.0648286	-0.0154179	0.0252287	0.0126474	0.00089115	0.0120293	0.0298048	0.0258949	0.0644096
/HDFNo	Unstimulated primary dermal fibroblasts used to detect inflammatory stimuli	CXCL10/IP-10	-0.0523293	-0.0800994	0.00022924	-0.0223488	0.0707301	0.0505916	0.0288305	0.0520179	0.0618727	0.0818862	-0.0759829	0.00160214	0.0560673	0.0544521	0.034162	0.0132972	-0.0484793	-0.0214959	-0.0399968	-0.0387385	-0.025946	-0.00529928	0.00466732
/HDFNo	Unstimulated primary dermal fibroblasts used to detect inflammatory stimuli	CXCL11/I-TAC	-0.0334152	-0.0406053	-0.0415418	-0.0225119	0.0570057	-0.0147306	0.0222125	-0.0286113	0.000638512	0.0709749	0.023425	-0.00990993	-0.020721	-0.00192119	0.0740391	-0.0464858	-0.030676	-0.0353164	-0.00461863	-0.0450376	-0.0317964	-0.0373001	-0.00186119
/HDFNo	Unstimulated primary dermal fibroblasts used to detect inflammatory stimuli	CXCL8/IL-8	-0.00696623	-0.0416979	-0.00152842	-0.000448976	0.000627788	0.0426229	-0.00423881	0.055765	-0.0300017	0.0629668	0.0109011	0.0126481	0.0406659	0.0368901	0.0590676	0.0317566	-0.0391521	-0.0764344	-0.0764344	-0.102942	-0.0240139	-0.0224341	0.0339781
/HDFNo	Unstimulated primary dermal fibroblasts used to detect inflammatory stimuli	CXCL9/MIG	-0.0470457	-0.0399509	-0.0158987	-0.0443969	0.0409027	0.0437309	0.0189951	0.0682319	0.0691713	0.140541	-0.0742441	0.0525943	0.0914242	0.058244	0.119471	0.126661	-0.0272593	-0.0805376	-0.059328	-0.0754531	-0.0654594	-0.0437803	0.0558624
/HDFNo	Unstimulated primary dermal fibroblasts used to detect inflammatory stimuli	EGFR	0.00115565	-0.00699926	0.0134446	0.00322811	0.0352158	0.0308187	0.0156827	0.0093868	0.0248493	0.0348956	0.0450279	0.0116458	0.019129	0.00859337	0.0215583	0.0514164	0.0462519	-0.00908138	-0.0175655	-0.0112875	0.00663429	0.0353739	0.018716
/HDFNo	Unstimulated primary dermal fibroblasts used to detect inflammatory stimuli	M-CSF	-0.0707967	-0.0361261	-0.08103	-0.0181923	0.0244443	-0.00726283	0.0382376	0.0116772	0.0387002	0.0808208	0.00986933	-0.000463562	0.0199621	0.0475481	0.0658805	0.00380217	-0.0161967	-0.0679682	-0.00531379	0.0133615	-0.0236828	0.0001354	-0.0121671
/HDFNo	Unstimulated primary dermal fibroblasts used to detect inflammatory stimuli	MMP-1	0.00864443	-0.0138848	-0.0143186	0.00754529	0.056783	0.080096	0.108045	0.10859	0.095083	0.152315	0.054196	0.0504735	0.030193	0.0396219	0.0805613	-0.0126708	-0.0333097	-0.0430052	-0.00997777	-0.0320042	-0.0257491	-0.00402984	0.0552842
/HDFNo	Unstimulated primary dermal fibroblasts used to detect inflammatory stimuli	PAI-I	-0.0941056	-0.0701299	-0.0566348	-0.0253836	0.0805432	0.0259135	0.00478202	0.0589373	0.00173575	0.048633	-0.0279946	-0.0343701	-0.0108774	-0.041966	0.0436654	-0.0505582	-0.028733	-0.0518966	-0.0180634	0.00163241	-0.00977335	-0.0122132	0.0750482
/HDFNo	Unstimulated primary dermal fibroblasts used to detect inflammatory stimuli	Proliferation_72hr	0.0784495	0.0315816	0.0214222	-0.0345292	-0.013141	0.0230711	0.0425591	0.0425591	0.0261687	0.00667367	0.00209206	0.0482907	0.0203195	0.000939067	-0.0125452	0.179033	0.156919	0.133618	0.139367	0.086719	0.102262	0.0598219	0.0724199
/HDFNo	Unstimulated primary dermal fibroblasts used to detect inflammatory stimuli	SRB	0.0238876	-0.0319788	-0.0334085	0.00337836	0.0365884	-0.0176693	-0.0105569	-0.046265	-0.0132827	0.0293082	-0.00186552	-0.0207611	-0.0135457	0.0114503	0.0386462	0.000631227	0.00443979	0.0244634	0.0198161	0.00973222	0.0127504	0.00693366	0.0429404
/HDFNo	Unstimulated primary dermal fibroblasts used to detect inflammatory stimuli	TIMP-1	-0.0410602	-0.0299121	-0.0136219	0.00341809	0.0156108	-0.0392129	-0.037557	0.0206185	0.0225416	0.0663117	-0.00689657	0.0103802	-0.0153633	0.0400912	0.0474007	0.0191502	0.0138859	0.00471035	0.00296813	-0.0342741	-0.019727	0.000829225	0.0475408
/HDFNo	Unstimulated primary dermal fibroblasts used to detect inflammatory stimuli	TIMP-2	0.192374	0.0177744	-0.016344	0.0546458	0.0222182	0.104675	0.0899417	0.0812717	0.114409	0.1434	0.202034	0.0799338	0.0912491	0.044911	0.100293	-0.228084	-0.121277	-0.0132756	0.0822071	0.0763187	0.0589822	0.0746688	-0.0567541
HDF3CGF	human dermal fibroblasts stimulated IL-1β, TNF-α, IFN-γ, EGF, bFGF, and PDGF-BB to model inflammation in the Th1 setting	CCL2/MCP-1	-0.212032	-0.189042	-0.132831	-0.062762	-0.00566045	-0.114061	-0.15617	-0.120419	-0.0703622	-0.0180187	-0.120419	-0.140472	-0.0949854	-0.01621	-0.000697866	-0.0618645	-0.117173	-0.0997216	-0.0655736	-0.0758814	-0.140744	-0.0425528	-0.0196641
HDF3CGF	human dermal fibroblasts stimulated IL-1β, TNF-α, IFN-γ, EGF, bFGF, and PDGF-BB to model inflammation in the Th1 setting	CD106/VCAM-1	-0.0138412	0.020193	0.0300845	-0.00136316	-0.0294021	0.0459788	0.0357443	0.0514817	0.00572421	-0.0100756	0.029942	0.0341011	0.00847719	0.0127966	-0.00716926	0.0147272	0.049891	0.0499957	0.0665858	0.0692485	0.0658797	0.0688476	0.0467902
HDF3CGF	human dermal fibroblasts stimulated IL-1β, TNF-α, IFN-γ, EGF, bFGF, and PDGF-BB to model inflammation in the Th1 setting	CD54/ICAM-1	-0.113859	-0.0829547	-0.044908	-0.0351784	0.0101204	-0.053852	-0.0664707	-0.0508085	-0.0211413	0.00725775	-0.0475068	-0.0507459	-0.0457108	-0.003179	0.0219418	-0.0658072	-0.0640166	-0.0699176	-0.0752026	-0.0775928	-0.066274	-0.0579831	-0.0409118
HDF3CGF	human dermal fibroblasts stimulated IL-1β, TNF-α, IFN-γ, EGF, bFGF, and PDGF-BB to model inflammation in the Th1 setting	Collagen I	-0.0133792	-0.0226015	0.06015	0.0160824	0.0395191	0.0364008	0.0397854	0.00565125	0.0135451	0.034878	0.096589	0.0793595	0.0717609	0.0951856	0.0779804	0.0168617	0.00618256	-0.00289064	0.0182897	0.0250094	0.0211318	0.0484074	0.0228986
HDF3CGF	human dermal fibroblasts stimulated IL-1β, TNF-α, IFN-γ, EGF, bFGF, and PDGF-BB to model inflammation in the Th1 setting	Collagen III	0.0384285	0.100415	0.0780759	0.0869648	0.0323446	0.126269	0.0543584	0.0857281	0.0911891	0.0421239	0.00179959	0.0970349	0.0688403	0.043235	0.0452787	0.0275149	0.0514133	0.0519343	0.0659731	0.0682862	0.0822029	0.0940838	0.0814252
HDF3CGF	human dermal fibroblasts stimulated IL-1β, TNF-α, IFN-γ, EGF, bFGF, and PDGF-BB to model inflammation in the Th1 setting	CXCL10/IP-10	-0.0192576	0.043662	0.030276	0.0334677	0.0238488	0.0278465	0.0390963	0.0429567	0.0500362	0.0367687	0.00886729	0.0326118	0.0376959	0.0350681	0.00622926	0.016055	0.0320077	0.0288088	0.0397561	0.0373142	0.0587354	0.038067	0.000432313
HDF3CGF	human dermal fibroblasts stimulated IL-1β, TNF-α, IFN-γ, EGF, bFGF, and PDGF-BB to model inflammation in the Th1 setting	CXCL11/I-TAC	-0.0834233	-0.0624411	-0.0572122	-0.0256818	-0.00167646	-0.0314085	-0.0124125	-0.0100541	-0.0109215	0.014219	-0.0452359	-0.0155353	-0.0190175	-0.00346102	0.0162433	-0.0122167	-0.0215084	-0.0234821	-0.0169501	-0.0322824	-0.0354384	-0.0019234	-0.0055951
HDF3CGF	human dermal fibroblasts stimulated IL-1β, TNF-α, IFN-γ, EGF, bFGF, and PDGF-BB to model inflammation in the Th1 setting	CXCL8/IL-8	-0.0904609	-0.0837935	-0.0398409	-0.0194803	-0.00713649	-0.128165	-0.119266	-0.0948376	-0.0450488	-0.00813898	-0.0915509	-0.0835485	-0.0298252	-0.0257059	-0.00378601	-0.0708278	-0.102547	-0.11061	-0.100448	-0.0805306	-0.0494522	-0.0236181	-0.0127098
HDF3CGF	human dermal fibroblasts stimulated IL-1β, TNF-α, IFN-γ, EGF, bFGF, and PDGF-BB to model inflammation in the Th1 setting	CXCL9/MIG	-0.0745158	-0.0967798	-0.0812823	-0.0165717	-0.00502715	-0.0761089	-0.093322	-0.0770261	-0.0303425	-0.000757206	-0.0768484	-0.0749872	-0.0525531	-0.00175227	0.00440524	-0.0354949	-0.0541141	-0.0453372	-0.0336986	-0.0423839	-0.0241959	-0.0117696	0.00852088
HDF3CGF	human dermal fibroblasts stimulated IL-1β, TNF-α, IFN-γ, EGF, bFGF, and PDGF-BB to model inflammation in the Th1 setting	EGFR	-0.0479705	-0.0687075	-0.108622	-0.00242782	0.0430395	-0.0552411	-0.0521324	-0.0672617	-0.012772	0.0457678	0.0226643	-0.0714516	-0.0243844	-0.00981135	0.0699315	-0.0956674	-0.110954	-0.103133	-0.123073	-0.0971939	-0.0941462	-0.0674346	-0.0426564
HDF3CGF	human dermal fibroblasts stimulated IL-1β, TNF-α, IFN-γ, EGF, bFGF, and PDGF-BB to model inflammation in the Th1 setting	M-CSF	-0.191431	-0.138555	-0.0770685	-0.0460824	-0.0056891	-0.105522	-0.0962608	-0.100334	-0.0751333	-0.0575745	-0.149506	-0.083005	-0.0780005	-0.0530732	0.0151929	-0.030712	-0.0306014	-0.0413502	-0.0558741	-0.0675764	-0.045794	-0.0517327	-0.0510366
HDF3CGF	human dermal fibroblasts stimulated IL-1β, TNF-α, IFN-γ, EGF, bFGF, and PDGF-BB to model inflammation in the Th1 setting	MMP-1	0.0202907	0.0115654	0.00214557	0.0210998	0.0341057	0.00331674	0.00792382	0.0238305	0.0503169	0.0704573	0.0556166	0.020965	0.0300335	0.0519512	0.0457162	-0.0585089	-0.0568429	-0.0707355	-0.0530716	-0.0416379	-0.00128857	0.00572673	0.0134956
HDF3CGF	human dermal fibroblasts stimulated IL-1β, TNF-α, IFN-γ, EGF, bFGF, and PDGF-BB to model inflammation in the Th1 setting	PAI-I	-0.329223	-0.0878406	-0.0510786	-0.00805654	0.0464074	-0.0184191	-0.00266894	-0.00167853	0.00616447	0.086962	-0.210053	-0.0456809	-0.00555397	-0.000591682	0.0716932	-0.087688	-0.0619356	-0.0649841	-0.0134526	-0.031373	0.0329836	0.000430358	-0.0323542
HDF3CGF	human dermal fibroblasts stimulated IL-1β, TNF-α, IFN-γ, EGF, bFGF, and PDGF-BB to model inflammation in the Th1 setting	Proliferation_72hr	-0.387444	-0.275953	-0.250682	-0.161227	-0.0213932	-0.339553	-0.250941	-0.239509	-0.170623	-0.0355839	-0.514631	-0.287162	-0.249444	-0.138767	-0.0189614	-0.248019	-0.193559	-0.243829	-0.186639	-0.1913	-0.178338	-0.129808	-0.119145
HDF3CGF	human dermal fibroblasts stimulated IL-1β, TNF-α, IFN-γ, EGF, bFGF, and PDGF-BB to model inflammation in the Th1 setting	SRB	-0.221017	-0.0233761	-0.00923611	-0.030738	-0.00417813	-0.00651247	0.000361089	0.000238199	-0.00801305	0.000176741	-0.209062	-0.0236357	-0.0178313	-0.0146716	-0.00882804	-0.00367286	-0.00825082	-0.00191064	0.0205023	0.0235681	0.0101387	0.0160402	0.0176359
HDF3CGF	human dermal fibroblasts stimulated IL-1β, TNF-α, IFN-γ, EGF, bFGF, and PDGF-BB to model inflammation in the Th1 setting	TIMP-1	-0.128451	-0.062665	-0.0921302	-0.056431	0.0137946	-0.0671062	-0.052665	-0.0591907	-0.00984906	0.0253405	-0.0447828	-0.0578087	-0.0570045	-0.0187953	0.0314687	-0.111424	-0.0748115	-0.0779206	-0.0693075	-0.0681041	-0.0700497	-0.033214	-0.00988109
HDF3CGF	human dermal fibroblasts stimulated IL-1β, TNF-α, IFN-γ, EGF, bFGF, and PDGF-BB to model inflammation in the Th1 setting	TIMP-2	0.19102	0.134143	0.119122	0.0891255	0.0729501	0.105778	0.124218	0.12126	0.116973	0.118469	0.276487	0.169653	0.1404	0.138176	0.0911182	-0.0652988	-0.0412206	0.0635147	0.123261	0.0756398	0.0987711	0.0490519	0.135824
/Mphg	Huvec endothelial cells co-cultured with primary blood derived macrophages and stimulated with a TLR2 ligand used to model TH1-type chronic inflammation and macrophage activation	CCL2/MCP-1	-0.125964	-0.106695	-0.0975536	-0.0306792	0.0140845	-0.107065	-0.0848591	-0.0442274	-0.0324199	0.0215199	-0.116185	-0.072525	-0.0613965	-0.000600199	0.0391474	-0.0143853	-0.0913047	-0.110817	-0.110221	-0.108775	-0.0887031	-0.0542029	-0.00499295
/Mphg	Huvec endothelial cells co-cultured with primary blood derived macrophages and stimulated with a TLR2 ligand used to model TH1-type chronic inflammation and macrophage activation	CCL3/MIP-1alpha	-0.0935424	-0.0957919	-0.0521298	-0.0143246	0.0139634	-0.064441	-0.0337687	-0.0184021	-0.0159236	0.000424452	0.0388297	-0.0296395	-0.0196006	-0.0106467	0.00824349	0.0196583	-9.82456e-05	-0.0109569	-0.00946268	0.0153991	0.0149655	0.000182397	-0.00218066
/Mphg	Huvec endothelial cells co-cultured with primary blood derived macrophages and stimulated with a TLR2 ligand used to model TH1-type chronic inflammation and macrophage activation	CD106/VCAM-1	-0.0340554	-0.0124394	0.0248468	0.0136453	0.0561894	0.0266551	0.0207856	0.0495465	0.0519758	0.0685691	0.0221669	-0.0137577	0.0185521	0.0295374	0.0387019	0.00508012	0.0246816	-0.001305	0.0269207	0.0169616	-0.0125981	0.00749763	0.00353697
/Mphg	Huvec endothelial cells co-cultured with primary blood derived macrophages and stimulated with a TLR2 ligand used to model TH1-type chronic inflammation and macrophage activation	CD40	-0.0228726	-0.0040591	-0.0664589	-0.0509093	0.0139361	-0.000109724	0.00225037	0.0139731	-0.000835554	0.00850691	-0.00502313	-0.0152965	0.0124925	-0.0257784	0.00693243	0.0635733	0.0390643	0.0270035	-0.0197534	-0.00204752	-0.0547102	-0.0536605	-0.0869279
/Mphg	Huvec endothelial cells co-cultured with primary blood derived macrophages and stimulated with a TLR2 ligand used to model TH1-type chronic inflammation and macrophage activation	CD62E/E-Selectin	-0.185621	-0.253231	-0.176513	-0.118966	0.00514318	-0.155976	-0.178185	-0.160457	-0.135707	-0.0461421	-0.0623899	-0.186759	-0.170985	-0.12515	0.0152414	-0.0799572	-0.0936951	-0.086918	-0.0935255	-0.108101	-0.119746	-0.144159	-0.110829
/Mphg	Huvec endothelial cells co-cultured with primary blood derived macrophages and stimulated with a TLR2 ligand used to model TH1-type chronic inflammation and macrophage activation	CD69	-0.0165455	0.0436772	0.0279098	0.0239479	0.0387596	0.0609856	0.0357268	-0.0294253	0.026122	0.0375674	0.0225242	0.0392173	0.04268	0.0182246	0.0283791	0.239283	0.199949	0.186515	0.184672	0.181116	0.130991	0.0831573	0.0116485
/Mphg	Huvec endothelial cells co-cultured with primary blood derived macrophages and stimulated with a TLR2 ligand used to model TH1-type chronic inflammation and macrophage activation	CXCL8/IL-8	-0.0774978	-0.00816951	-0.0115135	-0.0321367	0.0231087	0.023453	0.0119014	0.00848643	-0.000920393	0.0532499	0.00728259	-0.0343423	-0.00692213	-0.00563233	0.0388769	0.133219	0.0431023	0.00818071	0.00142989	0.0138061	0.0370261	0.000538027	-0.0236606
/Mphg	Huvec endothelial cells co-cultured with primary blood derived macrophages and stimulated with a TLR2 ligand used to model TH1-type chronic inflammation and macrophage activation	IL-1alpha	-0.0856346	-0.0376285	-0.0342143	0.00109001	0.0412141	0.0242654	0.0190602	0.0330922	0.022611	0.0413199	-0.0390272	-0.0375016	0.0250353	0.012097	0.0338466	-0.064807	-0.0443837	-0.0484223	-0.030321	-0.0490238	-0.0146091	-0.00593809	0.0184386
/Mphg	Huvec endothelial cells co-cultured with primary blood derived macrophages and stimulated with a TLR2 ligand used to model TH1-type chronic inflammation and macrophage activation	M-CSF	-0.0478041	-0.0954908	-0.0565538	-0.0415675	0.00475674	-0.0535282	-0.0464178	-0.0368352	-0.0327284	-0.0187764	0.00866433	-0.0704705	-0.0357405	-0.0346486	-0.01502	0.0542014	-0.0212189	-0.0239822	-0.0174545	-0.0279683	-0.024526	-0.0411677	-0.00991709
/Mphg	Huvec endothelial cells co-cultured with primary blood derived macrophages and stimulated with a TLR2 ligand used to model TH1-type chronic inflammation and macrophage activation	sIL-10	-0.184396	-0.14188	-0.0162446	0.0798511	0.0612092	-0.266409	-0.136844	-0.0645269	0.0449226	0.0737157	-0.237751	-0.159357	-8.75455e-05	0.0750103	0.0134228	-0.0612035	-0.159107	-0.122133	-0.159211	-0.0999131	-0.0205043	0.0232737	0.0375663
/Mphg	Huvec endothelial cells co-cultured with primary blood derived macrophages and stimulated with a TLR2 ligand used to model TH1-type chronic inflammation and macrophage activation	SRB	-0.0441292	-0.0238389	-0.0188735	-0.0166255	-0.0067655	-0.0207666	-0.0169245	-0.0166041	-0.0133704	-0.00691165	-0.0588218	-0.0172452	-0.0169673	-0.0121851	-0.00252763	-0.0163097	-0.0133667	-0.0104253	-0.00508695	-0.00947955	-0.00546481	-0.00726866	0.00102092
/Mphg	Huvec endothelial cells co-cultured with primary blood derived macrophages and stimulated with a TLR2 ligand used to model TH1-type chronic inflammation and macrophage activation	SRB-Mphg	-0.00995878	-0.0134026	-0.00176801	0.00176085	-0.00776182	-0.00675709	0.00779887	0.018176	0.00609718	0.0175664	-0.01253	-0.00429103	0.0119383	0.00204192	0.00918308	0.000540167	0.00473468	-0.0197552	-0.00482891	0.00118334	0.00504302	0.00407616	0.0107791
LPS	Huvec endothelial cells co-cultured with peripheral blood mononuclear cells and stimulated with LPS to model a Th1 type chronic inflammation and monocyte activation response	CCL2/MCP-1	-0.169788	-0.121146	-0.0881954	-0.0321304	0.0152825	-0.102451	-0.0963499	-0.0569072	-0.0311092	0.00700506	-0.187292	-0.112312	-0.0693513	-0.00212175	0.00928292	-0.0808606	-0.0669152	-0.0443437	-0.0292004	-0.0256969	-0.00282371	0.00499935	-0.00276005
LPS	Huvec endothelial cells co-cultured with peripheral blood mononuclear cells and stimulated with LPS to model a Th1 type chronic inflammation and monocyte activation response	CD106/VCAM-1	-0.0429929	0.0474293	0.0332005	0.0429277	0.0516192	0.0347218	0.0545837	0.0518316	0.0190625	0.0520174	0.00361908	0.0224558	0.0471342	0.0560321	0.0284361	0.0790223	0.0959397	0.105148	0.0926032	0.0927907	0.0895647	0.0664852	0.050634
LPS	Huvec endothelial cells co-cultured with peripheral blood mononuclear cells and stimulated with LPS to model a Th1 type chronic inflammation and monocyte activation response	CD141/Thrombomodulin	0.0243832	0.0625418	0.0653891	0.0418889	0.0244777	0.0618921	0.0543275	0.0702635	0.0638815	0.0412984	0.0380592	0.0520278	0.0462246	0.0416164	0.0188665	0.127326	0.0753375	0.0900121	0.0916477	0.0867682	0.0901486	0.0560837	0.0581459
LPS	Huvec endothelial cells co-cultured with peripheral blood mononuclear cells and stimulated with LPS to model a Th1 type chronic inflammation and monocyte activation response	CD142/Tissue Factor	-0.117022	0.0714695	0.0364892	0.0341787	0.0454368	0.0801322	0.0860237	0.0841217	0.0861028	0.0927717	0.120737	0.070569	0.070651	0.0503578	0.0572563	0.0789822	0.107956	0.0966353	0.143948	0.139295	0.11525	0.0726655	0.0620325
LPS	Huvec endothelial cells co-cultured with peripheral blood mononuclear cells and stimulated with LPS to model a Th1 type chronic inflammation and monocyte activation response	CD40	-0.163864	-0.102012	-0.129544	-0.13305	-0.0153038	-0.101109	-0.100207	-0.0979614	-0.0978495	-0.0566502	-0.132565	-0.0890935	-0.0917349	-0.0782572	-0.0105161	-0.108582	-0.112186	-0.136754	-0.162146	-0.152191	-0.179881	-0.186874	-0.173833
LPS	Huvec endothelial cells co-cultured with peripheral blood mononuclear cells and stimulated with LPS to model a Th1 type chronic inflammation and monocyte activation response	CD62E/E-Selectin	-0.113682	-0.0587924	-0.0389405	-0.0150957	0.0215045	-0.0169215	-0.0124268	0.00260927	0.0136064	0.0148576	0.00786061	-0.023013	-0.0205209	-0.026549	0.0149964	0.0104912	0.0046074	0.000345265	-0.0097534	0.00579754	-0.0318258	-0.0204265	-0.0173186
LPS	Huvec endothelial cells co-cultured with peripheral blood mononuclear cells and stimulated with LPS to model a Th1 type chronic inflammation and monocyte activation response	CD69	-0.0798442	0.00125252	-0.0423493	0.0262634	0.0241356	0.0339428	0.0224258	0.0501131	-0.0238555	-0.00795066	-0.0430957	0.015083	0.0476953	-0.00156721	0.0278525	0.0295496	0.0592342	0.0430809	0.00558908	0.00187103	0.017111	-0.0085944	0.0194619
LPS	Huvec endothelial cells co-cultured with peripheral blood mononuclear cells and stimulated with LPS to model a Th1 type chronic inflammation and monocyte activation response	CXCL8/IL-8	-0.267304	-0.193985	-0.0656366	-0.0228805	0.00345079	-0.154248	-0.147779	-0.121775	-0.0354392	-0.00258484	-0.222337	-0.168539	-0.0913291	-0.028086	0.0200978	-0.169344	-0.192879	-0.191179	-0.136572	-0.0751528	-0.043841	-0.0369478	-0.0243467
LPS	Huvec endothelial cells co-cultured with peripheral blood mononuclear cells and stimulated with LPS to model a Th1 type chronic inflammation and monocyte activation response	IL-1alpha	-0.24033	-0.0656762	-0.0531633	0.00856983	0.043954	-0.0695338	0.000950429	0.0333834	0.0412937	0.0567751	-0.226053	-0.0642916	-0.00727107	-0.0115822	0.0635617	0.124606	0.0659548	0.0162627	0.0441514	0.0443014	0.0170621	-0.0715814	-0.00758301
LPS	Huvec endothelial cells co-cultured with peripheral blood mononuclear cells and stimulated with LPS to model a Th1 type chronic inflammation and monocyte activation response	M-CSF	-0.0625467	-0.00131164	-0.0630731	0.00285665	0.0411666	-0.0210982	-0.00123549	-0.00613591	-0.00306667	0.0189956	-0.0216565	-0.00767869	-0.0204611	-0.0176845	0.051336	0.0291199	0.0232223	0.0155601	-0.0117758	-0.000400792	-0.00230047	0.00322924	-0.00509195
LPS	Huvec endothelial cells co-cultured with peripheral blood mononuclear cells and stimulated with LPS to model a Th1 type chronic inflammation and monocyte activation response	sPGE2	0.0452466	0.154951	0.18568	0.0997532	0.0111979	0.182136	0.172924	0.155204	0.125727	0.0702477	0.0078668	0.0395785	0.0962691	0.127653	0.0334824	0.164169	0.178853	0.23874	0.188856	0.245273	0.230362	0.171265	0.123717
LPS	Huvec endothelial cells co-cultured with peripheral blood mononuclear cells and stimulated with LPS to model a Th1 type chronic inflammation and monocyte activation response	SRB	-0.125611	-0.066167	-0.0741141	-0.0723031	-0.0448559	-0.0697165	-0.0659946	-0.0684146	-0.0649043	-0.024333	-0.141964	-0.0821796	-0.0764033	-0.0533669	-0.0176506	-0.140936	-0.12987	-0.125617	-0.095548	-0.0894105	-0.0533662	-0.0398975	-0.0159206
LPS	Huvec endothelial cells co-cultured with peripheral blood mononuclear cells and stimulated with LPS to model a Th1 type chronic inflammation and monocyte activation response	sTNF-alpha	-0.521582	-0.0503508	0.0121985	0.0133648	0.0125407	-0.175297	0.034491	0.0393038	0.0363616	0.0282681	-0.328043	-0.0299096	0.0284233	0.0235466	0.016865	-0.0505602	0.0570199	0.13336	0.0994413	0.0482197	0.0808405	0.0384898	-0.0574112
HPNo	Huvec endothelial cells co-cultured with un-stimulated peripheral blood mononuclear cells to model model basal endothelial cell/ T cell interactions	CCL2/MCP-1	-0.0850589	-0.0250405	-0.0221098	-0.00247933	-0.0190174	0.0147955	0.0224412	0.000303505	0.0166361	0.0466327	-0.00405254	-0.0494211	0.000996437	0.0174702	0.00888668	0.0388967	0.0576182	0.0525918	0.274344	0.0403849	0.148345	0.0525918	-0.0755687
HPNo	Huvec endothelial cells co-cultured with un-stimulated peripheral blood mononuclear cells to model model basal endothelial cell/ T cell interactions	CD106/VCAM-1	-0.0625185	0.169667	0.215995	0.152935	0.0322702	0.147483	0.20464	0.274382	0.183054	0.121752	0.0690426	0.0976538	0.205549	0.134464	0.0415465	0.341781	0.304551	0.395958	0.374619	0.306752	0.250487	0.175127	0.143812
HPNo	Huvec endothelial cells co-cultured with un-stimulated peripheral blood mononuclear cells to model model basal endothelial cell/ T cell interactions	CD141/Thrombomodulin	-0.00951998	0.0247704	0.000477913	-0.0140173	0.00190851	0.0176243	0.0273684	0.00504659	-0.00596278	0.013151	0.0317325	0.0072226	0.00808996	-0.0155777	0.0102149	0.000659623	0.0189535	0.0214375	0.0445945	0.0249564	0.0306279	0.0222018	0.0217652
HPNo	Huvec endothelial cells co-cultured with un-stimulated peripheral blood mononuclear cells to model model basal endothelial cell/ T cell interactions	CD142/Tissue Factor	-0.0748766	-0.0146067	-0.00509941	-0.00664098	0.0527643	-0.0510469	-0.00853258	0.00286331	0.0353596	0.00820237	-0.0241482	0.00670738	0.0389277	0.0390822	0.0890662	0.0629373	0.021994	0.063557	0.0450534	0.061384	0.096206	0.00990071	0.0168523
HPNo	Huvec endothelial cells co-cultured with un-stimulated peripheral blood mononuclear cells to model model basal endothelial cell/ T cell interactions	CD38	-0.133051	0.00524089	-0.00708404	0.0048128	0.0189703	-0.0951057	-0.0284671	0.0143023	-0.0161581	0.00763041	-0.0699707	-0.0407544	-0.0111528	-0.0494992	0.00412698	0.0810902	0.0241854	-0.0399009	-0.027539	-0.0219109	-0.0515353	-0.0659209	-0.0597765
HPNo	Huvec endothelial cells co-cultured with un-stimulated peripheral blood mononuclear cells to model model basal endothelial cell/ T cell interactions	CD40	-0.050146	-0.0582474	-0.0634827	-0.072146	-0.00817002	-0.0478174	-0.0552839	-0.0551363	-0.0677168	-0.0478174	-0.0220352	-0.0243668	-0.0674129	-0.0591404	-0.0283734	-0.0328414	-0.0930065	-0.13011	-0.186164	-0.171247	-0.089488	-0.106157	-0.07524
HPNo	Huvec endothelial cells co-cultured with un-stimulated peripheral blood mononuclear cells to model model basal endothelial cell/ T cell interactions	CD62E/E-Selectin	-0.0276481	0.00618034	-0.0704344	-0.0362801	-0.00593856	0.0390999	0.00526003	0.00911229	0.022775	0.0563102	-0.0450871	0.000815183	0.0201122	-0.0536542	0.029971	0.0797445	-0.0202908	0.0144713	0.0260092	-0.026977	-0.00169428	-0.035014	0.0448427
HPNo	Huvec endothelial cells co-cultured with un-stimulated peripheral blood mononuclear cells to model model basal endothelial cell/ T cell interactions	CD69	-0.059451	-0.072019	-0.0748	-0.00296528	0.047293	-0.0244542	-0.00708335	0.0349021	-0.0967339	0.011148	0.00407114	-0.0169011	0.0167578	-0.0110802	-0.0105986	0.150359	0.0399805	0.0627293	0.0124334	0.0391456	0.0200683	-0.00478957	0.0754691
HPNo	Huvec endothelial cells co-cultured with un-stimulated peripheral blood mononuclear cells to model model basal endothelial cell/ T cell interactions	CXCL8/IL-8	-0.0357874	0.0204572	-0.0232329	-0.0754548	0.0126609	0.0240393	0.0138799	0.00816185	-0.00618824	0.0215217	-0.00209974	-0.0123222	-0.00647163	0.00458399	0.0342247	0.0300244	-0.0396711	-0.048445	-0.0248085	0.0109807	0.0225626	-0.0226378	0.030572
HPNo	Huvec endothelial cells co-cultured with un-stimulated peripheral blood mononuclear cells to model model basal endothelial cell/ T cell interactions	CXCL9/MIG	-0.0785007	-0.0240491	-0.0442301	-0.00237563	0.0345684	-0.0626494	-0.00341907	0.0195433	-0.00446503	0.0617331	-0.0523387	0.0135569	0.0448385	0.0922355	0.0599311	-0.0254822	0.0181273	-0.0910172	-0.067105	-0.0251947	-0.0408506	-0.0675801	-0.000203464
HPNo	Huvec endothelial cells co-cultured with un-stimulated peripheral blood mononuclear cells to model model basal endothelial cell/ T cell interactions	M-CSF	-0.138255	-0.0850864	-0.065517	-0.0403309	0.0214625	-0.0288401	0.0511621	-0.0378069	-0.0148515	0.0178614	-0.078772	-0.0557035	-0.0431243	0.0110185	0.0366368	0.0752752	0.0337568	0.0735659	-0.0634991	-0.0838673	-0.0305471	0.0147749	0.0116676
HPNo	Huvec endothelial cells co-cultured with un-stimulated peripheral blood mononuclear cells to model model basal endothelial cell/ T cell interactions	sPGE2	0.00223968	0.0771469	0.0326382	0.0256864	0.0103217	0.012792	0.0539119	0.0446903	0.0255659	0.045482	0.016309	0.0563213	0.138748	0.0218102	0.0253561	0.0663626	0.037668	0.0429918	0.0397769	0.0301021	0.0161561	0.00254425	0.0046151
HPNo	Huvec endothelial cells co-cultured with un-stimulated peripheral blood mononuclear cells to model model basal endothelial cell/ T cell interactions	SRB	-0.0852246	0.000563303	0.00265616	-0.00303196	-0.0345533	-0.0142024	0.0014854	0.0114468	-0.0425418	-0.102325	-0.0584929	0.00780333	0.00598389	-0.00131488	-0.0584929	-0.0534138	-0.057514	-0.0344325	-0.0173319	-0.00486237	-0.0026592	0.0270661	0.0353443
HPNo	Huvec endothelial cells co-cultured with un-stimulated peripheral blood mononuclear cells to model model basal endothelial cell/ T cell interactions	sTNF-alpha	-0.0417185	-0.0276102	-0.00256635	0.0103436	0.0551915	0.229641	-0.00069841	0.0367794	0.0452454	0.139802	0.0246426	-0.00632649	0.491684	0.0681083	0.138451	-0.0361535	-0.0214836	-0.0194278	-0.0219991	0.0102961	0.0150582	0.00644853	0.127871
SAg	Huvec endothelial cells co-cultured with peripheral blood mononuclear cells and stimulated T cell receptor ligands to model a Th1 and T cell effector response	CCL2/MCP-1	-0.256867	-0.124465	-0.0828477	-0.016127	0.0374684	-0.110894	-0.0724906	-0.0657206	-0.0116277	0.0316834	-0.171061	-0.092109	-0.0380406	-0.016127	0.0300599	-0.077268	-0.104202	-0.124805	-0.122717	-0.0918438	-0.0557465	-0.0189948	0.0398904
SAg	Huvec endothelial cells co-cultured with peripheral blood mononuclear cells and stimulated T cell receptor ligands to model a Th1 and T cell effector response	CD38	-0.193554	-0.0593112	-0.0442537	-0.0387444	0.0199905	-0.0581377	-0.068954	-0.0402125	-0.0633525	-0.0234554	-0.10911	-0.050409	-0.0497895	-0.0427719	0.0228054	-0.0311816	-0.0559881	-0.0632993	-0.0797842	-0.0872274	-0.0624957	-0.0642387	-0.052095
SAg	Huvec endothelial cells co-cultured with peripheral blood mononuclear cells and stimulated T cell receptor ligands to model a Th1 and T cell effector response	CD40	-0.27278	-0.158991	-0.168533	-0.124217	-0.0743521	-0.143789	-0.121654	-0.13062	-0.168929	-0.0846592	-0.221717	-0.108303	-0.142521	-0.128379	-0.041209	-0.104248	-0.138063	-0.103413	-0.136813	-0.136121	-0.123641	-0.116638	-0.0837172
SAg	Huvec endothelial cells co-cultured with peripheral blood mononuclear cells and stimulated T cell receptor ligands to model a Th1 and T cell effector response	CD62E/E-Selectin	-0.251272	0.0343866	0.0940493	0.0752325	0.0824935	0.0216037	0.114811	0.115141	0.0947038	0.0862359	0.106468	0.0492881	0.0634059	0.105193	0.0593771	0.0994962	0.12468	0.135362	0.118554	0.13042	0.123936	0.101426	0.0697427
SAg	Huvec endothelial cells co-cultured with peripheral blood mononuclear cells and stimulated T cell receptor ligands to model a Th1 and T cell effector response	CD69	-0.311846	0.0436305	0.0207857	0.0267837	0.00766744	0.0058541	0.049849	0.0260905	0.0183913	0.0330416	-0.0757909	0.05882	0.0527947	0.0369159	0.00161776	0.140252	0.147917	0.16558	0.127792	0.139999	0.125549	0.100418	0.0615552
SAg	Huvec endothelial cells co-cultured with peripheral blood mononuclear cells and stimulated T cell receptor ligands to model a Th1 and T cell effector response	CXCL8/IL-8	-0.317887	-0.243976	-0.119195	-0.0163587	0.0726562	-0.208341	-0.195544	-0.132744	-0.0377443	0.0670892	-0.221127	-0.270772	-0.167398	-0.0468695	0.0638906	-0.2773	-0.259215	-0.27173	-0.284113	-0.108301	-0.119391	-0.0603258	0.00692104
SAg	Huvec endothelial cells co-cultured with peripheral blood mononuclear cells and stimulated T cell receptor ligands to model a Th1 and T cell effector response	CXCL9/MIG	-0.128366	-0.0773063	-0.0711033	-0.0273132	0.00204774	-0.0614873	-0.0607958	-0.0547973	-0.0181462	-0.00404045	-0.0864406	-0.0721003	-0.0396662	-0.015325	0.0127008	-0.0465163	-0.0847238	-0.0974366	-0.085018	-0.0758164	-0.0459511	-0.0288619	-0.0308577
SAg	Huvec endothelial cells co-cultured with peripheral blood mononuclear cells and stimulated T cell receptor ligands to model a Th1 and T cell effector response	PBMC Cytotoxicity	-0.0133757	-0.0166308	7.52011e-05	0.00368625	0.0402027	0.00851506	0.00529424	0.00147518	0.0147441	0.0379572	-0.026875	-0.0141092	0.0136485	0.0135144	0.0387441	0.0128567	-0.00278051	0.00715445	-0.0396369	-0.0320251	-0.00103725	0.00518036	0.015011
SAg	Huvec endothelial cells co-cultured with peripheral blood mononuclear cells and stimulated T cell receptor ligands to model a Th1 and T cell effector response	Proliferation	-0.351296	0.00878182	0.0423475	0.0298072	0.0308191	-0.0406533	0.00964902	0.0214197	0.0174961	0.0241395	-0.217232	0.00729524	0.0180301	0.0301786	0.0192235	-0.00286964	-0.0162348	-0.000931929	-0.0112919	0.0297017	0.000937937	-0.0205192	0.00876651
SAg	Huvec endothelial cells co-cultured with peripheral blood mononuclear cells and stimulated T cell receptor ligands to model a Th1 and T cell effector response	SRB	-0.178775	-0.0581996	-0.0552796	-0.0513097	-0.0122414	-0.0530756	-0.0486213	-0.0555491	-0.0312472	-0.0131453	-0.149825	-0.0548756	-0.0523523	-0.0331636	-0.013292	-0.132687	-0.178601	-0.167906	-0.14641	-0.148812	-0.101631	-0.0583395	0.0288952
/TH2	Huvec endothelial cell co-cultured with TH2 blasts and stimulated with TCR and IL-2 to model vascular inflammation in a TH1/2 environment	CCL2/MCP-1	-0.118805	-0.123278	-0.093921	0.00151111	0.0393184	-0.0926157	-0.0816762	-0.0442131	-0.0128143	0.0462029	-0.0532165	-0.0458818	-0.0359641	0.00196062	0.0453906	-0.115252	-0.125393	-0.0842315	-0.110835	-0.0995946	-0.0803656	-0.0291303	-0.000419374
/TH2	Huvec endothelial cell co-cultured with TH2 blasts and stimulated with TCR and IL-2 to model vascular inflammation in a TH1/2 environment	CCL26/Eotaxin-3	-0.202083	-0.165825	-0.149175	-0.123338	-0.0303798	-0.165825	-0.177291	-0.160411	-0.1601	-0.0812639	-0.135967	-0.13382	-0.131878	-0.123814	-0.0448862	-0.131131	-0.151109	-0.167022	-0.170062	-0.151986	-0.156546	-0.151839	-0.103181
/TH2	Huvec endothelial cell co-cultured with TH2 blasts and stimulated with TCR and IL-2 to model vascular inflammation in a TH1/2 environment	CD106/VCAM-1	-0.00790839	0.0241118	0.0260152	0.0341965	0.0382161	0.00327208	0.0171191	0.0349301	0.0328389	0.0309652	0.00293839	0.0277097	0.0233307	0.0335465	0.0304813	-0.00393634	0.00864849	0.0336494	0.022723	0.0248647	0.00903823	0.0203336	0.0168801
/TH2	Huvec endothelial cell co-cultured with TH2 blasts and stimulated with TCR and IL-2 to model vascular inflammation in a TH1/2 environment	CD38	-0.0367699	-0.028872	-0.0120238	-0.0120238	-0.0103332	-0.0349406	-0.0242013	-0.0077908	-0.0400099	-0.0151975	-0.0162605	-0.0119862	-0.00367248	-0.0106333	0.0115306	-0.0353164	-0.0226298	-0.00587643	0.0195293	-0.00142914	0.00589396	0.0152925	-0.0045309
/TH2	Huvec endothelial cell co-cultured with TH2 blasts and stimulated with TCR and IL-2 to model vascular inflammation in a TH1/2 environment	CD40	-0.148829	-0.136197	-0.113034	-0.0775019	-0.0195658	-0.115385	-0.09506	-0.118977	-0.103519	-0.0630693	-0.0614869	-0.0799672	-0.09506	-0.0778745	-0.00983208	-0.240199	-0.16692	-0.166155	-0.169012	-0.161869	-0.169852	-0.155858	-0.109816
/TH2	Huvec endothelial cell co-cultured with TH2 blasts and stimulated with TCR and IL-2 to model vascular inflammation in a TH1/2 environment	CD62E/E-Selectin	-0.136381	-0.00804925	0.033282	0.0435216	0.0562822	-0.0291734	0.0101544	0.044635	0.0294455	0.0311695	0.0248591	0.0173641	0.030463	0.0301094	0.0465555	0.0488607	0.0883859	0.082655	0.0392578	0.0781347	0.0690117	0.0242233	0.0294712
/TH2	Huvec endothelial cell co-cultured with TH2 blasts and stimulated with TCR and IL-2 to model vascular inflammation in a TH1/2 environment	CD62P/P-selectin	-0.0267632	-0.0546136	-0.0421255	-0.0170248	0.0325781	-0.0385911	-0.00903873	0.0217048	0.014756	0.0336972	0.0267498	-0.0305262	-0.047145	-0.0231387	0.0550506	-0.00466691	-0.0763256	-0.044073	-0.0434841	-0.060435	-0.0512024	-0.0402595	0.0128681
/TH2	Huvec endothelial cell co-cultured with TH2 blasts and stimulated with TCR and IL-2 to model vascular inflammation in a TH1/2 environment	CD69	-0.161719	-0.011991	-0.0362782	0.00625772	0.0125412	-0.042551	-0.00953885	-0.0121205	-0.0239981	-0.0309051	-0.0436633	-0.0209486	-0.00735646	-0.0108923	-0.00359521	-0.00574731	0.020337	0.0413274	0.0551312	0.0464694	0.0278919	0.0156135	0.0256805
/TH2	Huvec endothelial cell co-cultured with TH2 blasts and stimulated with TCR and IL-2 to model vascular inflammation in a TH1/2 environment	CD87/uPAR	-0.21213	-0.15788	-0.150429	-0.105675	-0.0159003	-0.161744	-0.179902	-0.0981246	-0.12898	-0.0785348	-0.145531	-0.140688	-0.133101	-0.0941663	-0.0449151	-0.174013	-0.19072	-0.190191	-0.202892	-0.226579	-0.180774	-0.193287	-0.0995133
/TH2	Huvec endothelial cell co-cultured with TH2 blasts and stimulated with TCR and IL-2 to model vascular inflammation in a TH1/2 environment	Collagen IV	0.0166925	-0.00213916	-0.00750627	0.0288416	-0.0194552	-0.0312023	-0.00572197	0.0157943	-0.00878527	-0.017024	0.0119385	0.0102604	0.0051871	0.0291771	0.0130536	0.0276471	0.0045835	-0.00538267	-0.00655812	-0.0128347	-0.0020123	0.0183655	0.0111139
/TH2	Huvec endothelial cell co-cultured with TH2 blasts and stimulated with TCR and IL-2 to model vascular inflammation in a TH1/2 environment	CXCL8/IL-8	-0.127094	-0.0543146	-0.0882747	0.00435741	0.028758	-0.0420103	-0.0448694	-0.029491	-0.0630287	0.0257035	-0.0533942	-0.0574248	-0.0379583	-0.0555728	0.0479729	-0.0490817	-0.0824463	-0.0839319	-0.0395731	-0.0548242	-0.0486593	-0.0501394	0.0274327
/TH2	Huvec endothelial cell co-cultured with TH2 blasts and stimulated with TCR and IL-2 to model vascular inflammation in a TH1/2 environment	CXCL9/MIG	-0.0122838	0.00909071	-0.0199924	0.00326797	0.0322338	0.000192916	0.0109926	0.0127776	0.0132552	0.0207204	0.00572569	0.00592435	0.00773025	0.00748843	0.0199732	-0.021405	-0.0328312	-0.0339696	-0.0191284	-0.0297332	-0.0178265	0.0131606	0.0208969
/TH2	Huvec endothelial cell co-cultured with TH2 blasts and stimulated with TCR and IL-2 to model vascular inflammation in a TH1/2 environment	PBMC Cytotoxicity	-0.0150374	-0.0104391	-0.0157066	-0.00423968	-0.00785391	-0.0167196	-0.0109563	-0.00679856	-0.00839344	-0.0233592	-0.0358893	-0.0230598	-0.0106763	-0.00148487	-0.0021621	-0.0027702	-0.0509809	-0.0517489	0.00685024	0.00713239	-0.0574766	-0.0597541	-0.00869783
/TH2	Huvec endothelial cell co-cultured with TH2 blasts and stimulated with TCR and IL-2 to model vascular inflammation in a TH1/2 environment	sIL-17A	0.139803	0.0649598	0.0928061	0.129593	0.0581993	0.145567	0.168233	0.164693	0.100142	0.10555	0.053888	0.134172	0.189028	0.095188	0.0364008	0.175191	0.033945	0.0449272	0.0402298	0.0434244	0.0415709	-0.00826613	0.0562236
/TH2	Huvec endothelial cell co-cultured with TH2 blasts and stimulated with TCR and IL-2 to model vascular inflammation in a TH1/2 environment	sIL-17F	-0.0696753	-0.0657628	-0.0542321	-0.0356697	0.00478585	-0.0405426	-0.0126671	0.17252	-0.0473335	-0.0260849	-0.0816292	-0.0789442	0.136976	-0.0332536	-0.0219572	0.136778	0.0215349	0.00310053	0.000740233	0.0613866	0.0530745	0.0959904	0.0435292
/TH2	Huvec endothelial cell co-cultured with TH2 blasts and stimulated with TCR and IL-2 to model vascular inflammation in a TH1/2 environment	SRB	-0.181686	-0.091382	-0.0812193	-0.0710343	-0.0221478	-0.0648534	-0.062079	-0.06611	-0.061875	-0.0368475	-0.125972	-0.0671638	-0.0803909	-0.0567393	-0.0191187	-0.17413	-0.131036	-0.0839441	-0.0826818	-0.0606209	-0.051304	-0.0372967	-0.0137087
3C	HUVEC endothelial cells stimulated with IL-1β, TNF-α/IFN-γ to model vascular inflammation in a TH1 environment	CCL2/MCP-1	-0.253705	-0.23527	-0.168917	-0.09272	0.0262444	-0.161496	-0.14968	-0.156647	-0.0884326	0.00665136	-0.252648	-0.168048	-0.124057	-0.0221681	0.0295634	-0.0948008	-0.119273	-0.138895	-0.153099	-0.154501	-0.0757884	-0.053937	0.0263339
3C	HUVEC endothelial cells stimulated with IL-1β, TNF-α/IFN-γ to model vascular inflammation in a TH1 environment	CD106/VCAM-1	0.0352845	0.0328128	0.0432216	0.0252334	0.0345907	0.0441785	0.0450831	0.0458605	0.0482592	0.0397797	0.0364382	0.0365918	0.0335867	0.0385583	0.0329677	0.0733502	0.0693111	0.0735038	0.0935629	0.0921919	0.0929514	0.0598525	0.0392981
3C	HUVEC endothelial cells stimulated with IL-1β, TNF-α/IFN-γ to model vascular inflammation in a TH1 environment	CD141/Thrombomodulin	-0.0339698	0.0257818	0.0385389	0.0335509	0.0247711	0.0195613	0.0550596	0.051044	0.0555035	0.035065	0.0361681	0.0496409	0.0562238	0.0720972	0.0444953	0.0875256	0.129217	0.1432	0.138654	0.133764	0.126975	0.107358	0.0956
3C	HUVEC endothelial cells stimulated with IL-1β, TNF-α/IFN-γ to model vascular inflammation in a TH1 environment	CD142/Tissue Factor	-0.0612106	0.0664494	0.091856	0.0857888	0.0642562	0.0888745	0.115858	0.119591	0.130071	0.0860398	0.223734	0.150085	0.138677	0.133384	0.0403009	0.112131	0.127856	0.111266	0.142386	0.144797	0.136	0.109068	0.0920322
3C	HUVEC endothelial cells stimulated with IL-1β, TNF-α/IFN-γ to model vascular inflammation in a TH1 environment	CD54/ICAM-1	-0.0592307	-0.0591768	-0.0416691	-0.0426796	-0.00641349	-0.0412551	-0.0545666	-0.0460914	-0.0340749	-0.0146039	-0.0327797	-0.0449164	-0.0484773	-0.0363699	-0.00703439	-0.0154887	-0.0266966	-0.0116307	-0.078048	-0.0134091	-0.0326055	-0.0289237	-0.00518876
3C	HUVEC endothelial cells stimulated with IL-1β, TNF-α/IFN-γ to model vascular inflammation in a TH1 environment	CD62E/E-Selectin	-0.0825531	-0.00292564	0.0149355	0.012825	0.0403071	0.00780173	0.021818	0.0276222	0.0200138	0.021852	0.017825	0.002258	0.0154529	0.0262457	0.0228699	0.0543171	0.0343469	0.0426189	0.0518054	0.0332053	0.0318888	0.0325189	0.0220612
3C	HUVEC endothelial cells stimulated with IL-1β, TNF-α/IFN-γ to model vascular inflammation in a TH1 environment	CD87/uPAR	-0.427516	-0.407707	-0.342436	-0.328421	-0.155726	-0.370465	-0.367893	-0.36775	-0.33949	-0.232293	-0.407395	-0.369749	-0.349344	-0.246926	-0.138333	-0.432409	-0.470881	-0.474902	-0.454579	-0.462948	-0.414995	-0.382786	-0.264515
3C	HUVEC endothelial cells stimulated with IL-1β, TNF-α/IFN-γ to model vascular inflammation in a TH1 environment	CXCL8/IL-8	-0.453167	-0.340617	-0.214584	-0.119523	-0.0162294	-0.273088	-0.274574	-0.211773	-0.104239	0.000998832	-0.301845	-0.300728	-0.180298	-0.095459	0.00749299	-0.380576	-0.41227	-0.399314	-0.362875	-0.288612	-0.221901	-0.18014	-0.10949
3C	HUVEC endothelial cells stimulated with IL-1β, TNF-α/IFN-γ to model vascular inflammation in a TH1 environment	CXCL9/MIG	-0.0253714	-0.0161417	-0.0233754	-0.00423635	0.0135208	-0.0186312	-0.0185396	-0.0164607	-0.0113854	-0.00196007	-0.0195254	-0.0263262	-0.00730496	-0.00372702	0.00808426	-0.0304726	-0.0317862	-0.0347932	-0.0283887	-0.0283404	-0.00713726	-0.0101401	-0.0138412
3C	HUVEC endothelial cells stimulated with IL-1β, TNF-α/IFN-γ to model vascular inflammation in a TH1 environment	HLA-DR	-0.440795	-0.235247	-0.189605	-0.130229	-0.0226559	-0.146598	-0.152579	-0.138027	-0.129256	-0.059362	-0.27771	-0.147801	-0.144455	-0.0759035	-0.00721127	-0.291897	-0.242157	-0.213382	-0.210488	-0.216296	-0.208203	-0.145083	-0.0768141
3C	HUVEC endothelial cells stimulated with IL-1β, TNF-α/IFN-γ to model vascular inflammation in a TH1 environment	Proliferation	-0.228309	-0.11839	-0.116025	-0.0814959	-0.0565052	-0.0886071	-0.0735817	-0.0975553	-0.0361327	-0.00269515	-0.403892	-0.102208	-0.0882909	-0.054064	-0.0650094	-0.144176	-0.0902457	-0.0674827	-0.0261601	-0.0361459	-0.0181135	-0.00305129	-0.0169467
3C	HUVEC endothelial cells stimulated with IL-1β, TNF-α/IFN-γ to model vascular inflammation in a TH1 environment	SRB	-0.214536	-0.11283	-0.0961404	-0.0934329	-0.0454344	-0.0863066	-0.0778627	-0.0845898	-0.0712744	-0.0565005	-0.221679	-0.0985571	-0.0941939	-0.0764712	-0.0489203	-0.0772321	-0.0728804	-0.0875091	-0.0972203	-0.101156	-0.079962	-0.0759704	-0.052395
